# Supplementary material for: Genome-wide analysis of the Populus trichocarpa laccase gene family and functional identification of PtrLAC23
Source: Frontiers journal article supplement (doi:10.3389/fpls.2022.1063813), 2023-01-17
Supplement: Data_Sheet_1.PDF [file Data_Sheet_1.PDF]

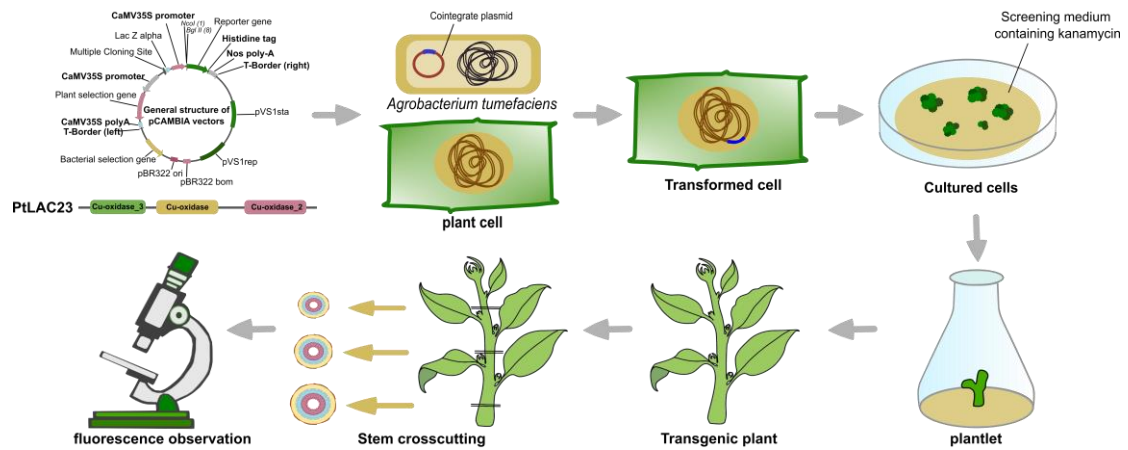

**Fig. S1** Schematic diagram of experimental process of agrobacterium-mediated transformation (ATMT), transgenic plant screening, freehand section and fluorescence observation.
