# Supplementary material for: Genome-wide analysis of the Populus trichocarpa laccase gene family and functional identification of PtrLAC23
Source: Frontiers journal article supplement (doi:10.3389/fpls.2022.1063813), 2023-01-17
Supplement: Data_Sheet_2.PDF [file Data_Sheet_2.PDF]

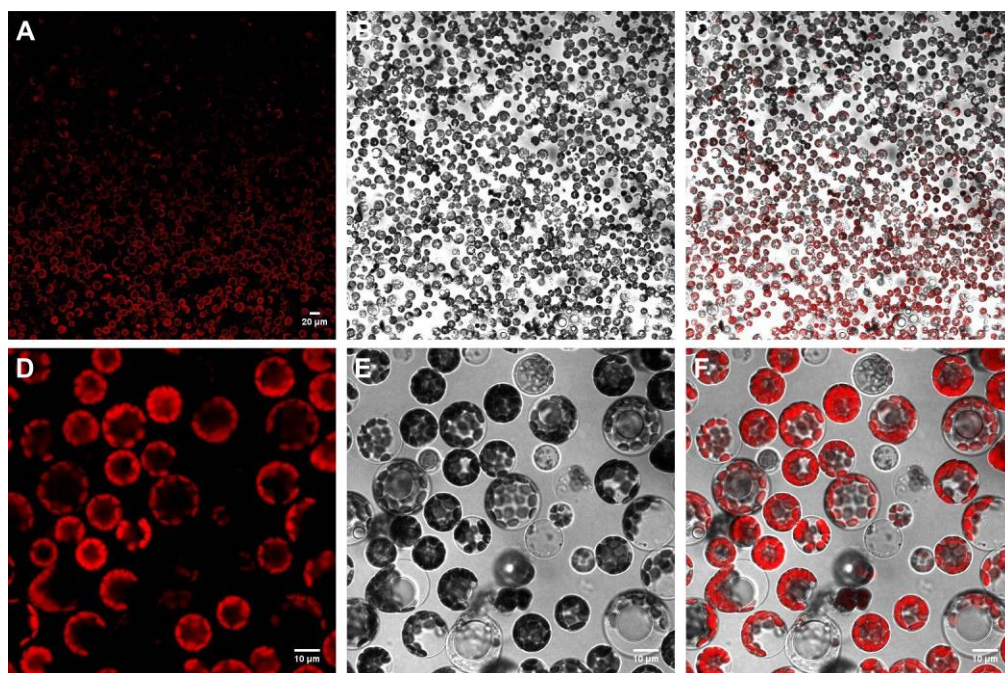

**Fig. S2.** Fluorescence observation of *proLAC23::LAC23-EGFP* transgenic *Populus* protoplasts. (A) spontaneous fluorescence of chloroplast at 20×; (B) image under the bright field at 20×; (C) image after the merge of (A) and (B); (D) spontaneous fluorescence of chloroplast at 100×; (E) image under the bright field at 100×; (F) image after the merge of (D) and (E).
