# Supplementary material for: Genome-wide analysis of the Populus trichocarpa laccase gene family and functional identification of PtrLAC23
Source: Front Plant Sci. 2023 Jan 17;13:1063813. doi: 10.3389/fpls.2022.1063813 (PMC9887407; doi:10.3389/fpls.2022.1063813)
Supplement: Supplementary file 4 [file Table_2.xlsx]

## Sheet: Sheet1
	Apical bud Early Spring f1	Apical bud Early Spring f2	Apical bud mid spring f1	Apical bud mid spring f2	Apical bud late winter f1	Apical bud late winter f2	predormant bud I	predormant bud II	early dormant bud	late dormant bud	Fully open bud	Stem Early spring f1	Stem Early spring f2	stem mid spring f1	stem late fall f1	stem late fall f2	stem early winter f1	stem early winter f2	stem mid winter	stem late winter f1	stem late winter f2	stem node.standard	Stem internode.standard	stem ammonia	Stem.nitrate	stem.urea	leaf immature.standard	Leaf young.standard	leaf first full expanded.standard	Root.standard	root tip.standard	root ammonia	Root.nitrate	root.urea	BESC423.ZL 7 female early	BESC443.ZG 43 female receptive	BESC842.ZI 22 female late	GW9592.ZK 10 male early	GW9840.ZE 30 male early	GW9911.ZK 51 male mid
	1	2	3	4	5	6	7	8	9	10	11	12	13	14	15	16	17	18	19	20	21	22	23	24	25	26	27	28	29	30	31	32	33	34	35	36	37	38	39	40
PtrLAC1	0	0.453	0.692	0	0	0	0.105	0.172	0.088	0.022	0.913	0	0	0.176	0	0	0.022	0	0.052	0.016	0.022	1.294	2.447	1.991	1.823	1.652	0.213	0.945	1.129	1.002	0.93	6.701	7.423	3.441	0.867	0.108	0.374	0.875	0.257	0.249
PtrLAC2	0	0	0.754	0	0	0	0.035	0.034	0.01	0	0.023	0	0	0	0	0	0	0	0	0	0	0.702	2.371	0.3	0.255	0.314	0.004	0.054	0.054	0.024	0.059	0.073	0.07	0.038	1.469	0.101	0.214	2.787	0.353	0.091
PtrLAC3	0	0	0	0	0	0	0	0	0	0	0	0	0	0	0	0	0	0	0	0	0	0	0	0	0	0	0	0	0	0	0	0	0	0	0	0	0.004	0	0	0
PtrLAC4	0	0.399	1.187	0.057	0.041	0	0.031	0.094	0.048	0	0.269	0.074	0	0.02	0.124	0.059	0.028	0.029	0.025	0.029	0	0.795	1.795	0.375	0.51	0.367	0.083	0.161	0.265	3.688	0.15	2.689	3.895	3.322	11.184	7.998	5.601	32.995	11.821	1.152
PtrLAC5	0	0.087	0.216	0	0	0	0	0.01	0.012	0	0.942	0	0	0.061	0	0	0	0	0	0	0	1.176	2.314	0.722	1.019	0.806	0.066	0.667	1.165	0.024	0.619	0.366	0.688	0.403	16.009	4.036	5.993	141.785	107.668	37.285
PtrLAC6	0	0	0	0	0	0	0.007	0	0	0	0.029	0	0	0.035	0	0	0	0	0	0	0	0.013	0.066	0.019	0.068	0	0.005	0	0.026	0.013	0.027	0.101	0.115	0.04	0.169	0.028	0.114	0.013	0.017	0.007
PtrLAC7	0.023	0.777	1.537	0	0	0	0.418	0.26	0.261	0.051	3.005	0.024	0	0.445	0.065	0.066	0	0	0	0	0	7.217	17.102	5.035	5.927	5.308	0.973	3.73	3.9	4.551	3.159	14.69	17.567	9.642	2.601	0.978	2.167	1.468	0.5	0.21
PtrLAC8	0	0.386	0.253	0	0	0	0.056	0.056	0.051	0	0.435	0	0	0.064	0	0	0	0	0	0	0	0.213	0.656	0.284	0.369	0.143	0.03	0.15	0.22	0.779	0.16	0.243	0.469	0.79	0.322	0.109	0.11	0.434	0.152	0.145
PtrLAC50	0	0.347	0.023	0	0.117	0	0	0	0	0	0	0	0	0.09	0.103	0	0	0.014	0	0	0	0.001	0	0	0	0.003	0	0	0	0.651	0	1.146	1.124	0.514	0.085	0.011	0	0.004	0.005	0.324
PtrLAC9	0	0.192	0.047	0	0.051	0.035	0.104	0.017	0.069	0.04	0	0	0	0.06	0.104	0	0	0	0.05	0	0	0.01	0	0.013	0.01	0.021	0.004	0	0	0.068	0	0.117	0.028	3.689	0.411	0.026	0.014	0.048	0.062	2.254
PtrLAC10	0	0.018	0	0	0	0	0.12	0.143	0.447	0.007	0.036	0	0	0	0.073	0	0	0	0	0	0	0.029	0.006	0	0.02	0.048	0.223	0.191	0.043	1.045	0.291	0.667	0.823	0.218	0.006	2.142	0.858	0.011	0	0.007
PtrLAC11	0	0.051	0.298	0	0	0	0.011	0.06	0.123	0	0.389	0	0	0.156	0	0	0	0	0	0	0	8.721	27.795	4.544	6.743	5.142	0.321	0.491	0.57	11.351	0.711	14.458	20.95	14.583	33.308	42.64	23.923	0.502	0.588	0.187
PtrLAC12	0	0	0.677	0	0	0	0.018	0.089	0.017	0	0.084	0	0	0.102	0	0	0	0	0	0	0	4.355	13.32	2.213	3.78	1.978	0.057	0.013	0.077	2.35	0.042	2.329	3.512	2.172	39.295	7.489	13.407	5.249	17.018	0.95
PtrLAC13	0	0.088	1.379	0	0.085	0	0.765	0.342	0.196	0.005	0.063	0	0	0.062	0	0.031	0	0	0	0	0	5.624	0.262	0.061	0.062	0.153	0.007	0.023	0.078	135.99	0.007	14.927	25.067	18.684	14.595	25.243	27.196	1.371	2.808	31.607
PtrLAC14	0	0.114	1.921	0	0	0	0.043	0.064	0.082	0	0.4	0	0	0.055	0	0	0	0	0	0	0	1.964	4.621	1.065	1.551	1.097	0.026	0.249	0.352	1.916	0.249	2.595	4.498	2.435	12.565	7.862	6.971	22.274	14.46	1.452
PtrLAC15	0	0.059	1.238	0	0	0	0.079	0.159	0.064	0	0.587	0	0	0	0	0	0	0	0	0	0	4.147	11.038	3.008	2.791	2.321	0.151	0.493	0.638	2.549	0.419	3.197	5.963	3.43	36.412	21.046	13.653	9.501	11.066	2.111
PtrLAC49	0	0.103	1.666	0	0	0	0.028	0.026	0.01	0	0.107	0	0	0.113	0	0	0	0	0	0	0	1.819	5.027	1.267	1.25	0.908	0.014	0.071	0.119	2.373	0.074	1.705	3.033	2.331	13.696	2.903	7.217	8.195	4.779	0.803
PtrLAC17	0	0.42	1.526	0	0	0	0.339	0.357	0.469	0.028	8.145	0	0	0.037	0	0	0	0	0	0	0	2.505	5.034	3.743	4.711	3.017	0.758	2.932	5.075	4.047	2.908	1.822	3.25	5.395	8.108	9.173	4.703	74.518	46.586	14.157
PtrLAC18	0	0	0	0	0	0	0.014	0.029	0.29	0	0.117	0	0	0	0	0	0	0	0	0	0	5.991	18.445	2.341	3.122	2.628	0.125	0.022	0.018	3.715	0.205	1.983	4.17	2.078	15.724	17.973	12.085	10.155	6.177	0.461
PtrLAC19	0.138	1.254	8.054	0.045	0.182	0.03	1.826	2.785	3.278	0.006	0.114	0.048	0.226	0.406	0.277	0.191	0.07	0.086	0.231	0	0	17.857	33.843	6.863	10.959	7.234	0.201	0.085	0.11	28.45	0.339	21.106	36.241	18.566	101.161	31.59	34.255	2.991	8.121	10.713
PtrLAC20	0	0.139	1.086	0	0	0	0.061	0.1	0.107	0.007	0.105	0	0	0.029	0.021	0	0	0	0	0	0	3.426	9.052	3.095	3.159	4.464	0.094	0.475	0.968	4.226	0.498	14.657	19.067	9.447	40.905	11.923	15.636	0.466	0.419	0.061
PtrLAC21	0	0.247	1.514	0.022	0	0	0.323	0.365	1.202	0.014	0.64	0.023	0.037	0.181	0.074	0.174	0	0	0	0.011	0	7.792	19.64	2.996	3.42	3.719	0.113	0.297	0.449	21.059	0.328	16.689	27.009	18.378	47.167	57.752	32.299	91.037	71.29	10.449
PtrLAC22	0.025	1.296	2.113	0	0	0.039	0.307	0.178	0.094	0.015	2.947	0	0	0.442	0.024	0	0	0	0	0	0.023	0.646	0.882	1.462	1.72	1.332	0.343	1.797	2.517	1.352	1.828	0.253	0.68	1.674	2.24	0.393	0.203	1.36	0.925	1.304
PtrLAC23	0	0	0.269	0	0	0	0.012	0.063	0.011	0	0.008	0	0	0	0	0	0	0	0	0	0	0.972	3.413	0.526	0.439	0.748	0.015	0.038	0.027	0.472	0.046	0.619	0.713	0.182	1.686	0.107	0.386	1.434	1.937	0.061
PtrLAC24	0	0	2.341	0	0	0	0.054	0.035	0	0	0.008	0	0	0	0	0	0	0	0	0	0	1.394	4.345	0.995	0.88	0.96	0.018	0.074	0.046	0.653	0.04	0.756	1.054	0.247	2.108	0.401	0.301	3.62	2.325	0.076
PtrLAC25	0.302	1.209	3.316	0.222	0.161	0.121	1.21	1.795	2.975	0.082	0.739	0.07	0.071	0.642	0.696	0.633	0.261	0.167	0.091	0.077	0.071	6.966	8.127	2.927	2.036	3.871	0.744	0.488	0.174	3.264	1.262	4.02	3.354	2.595	6.829	0.63	3.861	1.4	1.489	3.118
PtrLAC26	0.107	1.309	3.999	0.115	0.075	0.028	0.81	1.213	2.603	0.026	0.09	0.068	0.196	0.423	0.422	0.334	0.109	0.066	0.079	0	0.039	4.749	7.732	1.249	1.79	1.36	1.247	0.192	0.057	9.961	1.653	4.575	8.631	4.495	39.252	7.14	11.887	0.818	1.043	0.653
PtrLAC27	0	0	2.651	0	0	0	0.026	0.031	0.323	0.003	0.108	0	0	0	0.054	0	0	0	0	0	0	4.114	13.209	1.522	2.397	2.079	0.116	0.127	0.091	2.546	0.51	1.356	2.287	1.379	5.093	21.67	5.789	5.863	0.211	0.098
PtrLAC28	0.025	0.834	0.077	0.062	0.106	0	0.025	0	0.091	0.427	0.028	0	0	0.326	0.146	0	0.023	0	0	0	0.038	0.017	0.003	0	0.003	0	0.003	0	0.003	10.771	0	11.78	4.144	5.904	0.579	0.062	0.139	0.052	0.136	0.649
PtrLAC29	0	0.109	5.441	0	0	0	0.028	0.44	0.068	0	0.958	0	0	0.122	0	0	0	0	0	0	0	0.997	2.148	0.957	1.662	1.132	0.263	1.184	1.246	0.567	0.858	1.494	2.173	0.731	4.545	1.989	2.337	0.73	0.365	0.013
PtrLAC30	0.023	0.479	22.11	0.023	0	0	0.174	0.111	0.095	0	0.973	0	0	0.276	0	0	0	0	0	0	0	4.453	11.469	8.616	15.187	18121	0.811	1.795	2.878	5.632	2.342	10.682	15.46	7.749	109.924	61.571	44.151	7.886	4.413	0.602
PtrLAC31	0	0	0.025	0	0	0	0.006	0.022	0.011	0.01	0	0	0	0	0	0	0	0	0	0	0	0	0.004	0	0	0.009	0	0	0	5.759	0.005	0.258	0.172	0.093	0.007	0	0	0.022	0.04	0.007
PtrLAC32	0.446	1.856	0.843	0.139	0.221	0.18	0.717	0.559	2.398	0.143	0.032	0.184	0.302	1.249	1.684	0.884	0.315	0.285	0.371	0.16	0.145	0.205	0.129	0.175	0.151	0.205	0.006	0.007	0.019	16.335	0.013	10.836	12.812	5.576	0.182	0.457	0.269	4.804	4.532	0.149
PtrLAC33	0	1.155	4.998	0	0	0	0.199	0.125	0.273	0.078	0.999	0	0.475	1.125	0	0.028	0	0	0	0.014	0	0.87	1.04	0.53	0.675	0.392	2.888	2.141	1.029	2.728	2.682	1.514	0.735	1.875	0.744	0.075	0.22	0.727	1.049	0.117
PtrLAC34	0	0.032	0	0	0	0	0.051	0	0	0.08	0	0	0	0	0.036	0	0	0	0.038	0.012	0	0.036	0.026	0.373	0.278	0.417	0	0.004	0.007	11.793	0	1.406	2.694	4.448	0.153	0.08	0.094	0	0.029	0.073
PtrLAC35	0	0	0	0	0	0	0.005	0	0	0.006	0	0	0	0	0	0	0	0	0	0	0	0.014	0.056	1.26	1.111	4.106	0	0	0.003	0.651	0	0.069	0.152	0.395	0	0	0.006	0.016	0	0.028
PtrLAC36	0	0	0	0	0	0	0	0	0	0.006	0	0	0	0	0	0	0	0	0	0	0	0	0	0	0	0.037	0	0	0	0.025	0	0	0.01	0.008	0	0	0	0	0.006	0.016
PtrLAC51	0	0	0	0	0	0	0	0	0	0.034	0	0	0	0	0	0	0	0	0	0	0	0	0	0.027	0	0.235	0	0	0	0.015	0	0.007	0	0	0.019	0	0	0.028	0	0
PtrLAC37	0	0	0	0	0	0	0.006	0	0.01	0.007	0.038	0	0	0	0	0	0	0	0	0	0	0.043	0.008	0.014	0.008	0	0.024	0.007	0.034	16.978	0.008	4.055	4.036	1.182	0	0	0	0.008	0	0
PtrLAC38	0	0	0	0	0	0	0	0	0	0	0	0	0	0	0	0	0	0	0	0	0	0	0	0	0	0	0	0	0	0.408	0	0.08	0.764	0.133	0	0	0	0.026	0.083	0.018
PtrLAC39	0	0	0	0	0	0	0	0.009	0	0	0	0	0	0	0	0	0	0	0	0	0	0	0	0	0	0	0	0	0	0.162	0	0.052	0.062	0.01	0	0	0	0	0	0
PtrLAC52	0	0	0.029	0.041	0	0	0.012	0	0.026	0	0.03	0	0	0	0	0	0	0	0	0	0	0.083	0.054	0.004	0.034	0.007	0.278	0.102	0.06	26.629	0.078	4.355	5.17	1.974	0.005	0.01	0	0.009	0.022	0.023
PtrLAC40	0	0	0	0	0	0	0.006	0.008	0.032	0.006	0.068	0	0	0	0	0	0	0	0	0	0	0.002	0.02	0	0.021	0.038	0.028	0.023	0	0.997	0.004	0.436	1.256	0.438	0	0	0	0.009	0.085	0.028
PtrLAC41	0	0.431	7.705	0	0	0	0.088	0.157	0.348	0.018	0.753	0	0	0.176	0.049	0	0.037	0	0	0	0	4.138	10.83	5.394	6.318	6.341	0.195	0.463	0.854	2.544	0.563	4.639	7.105	3.773	18.335	8.145	11.086	91.064	60.954	6.956
PtrLAC42	0	0.05	0.679	0	0	0	0.005	0	0.03	0	0.647	0	0	0.041	0.022	0	0	0	0	0	0	0.421	1.206	0.378	0.341	0.309	0.092	0.619	0.771	0.756	0.514	0.627	0.66	0.669	1.407	0.146	0.378	1.14	0.839	0.306
PtrLAC43	0.39	0.562	0.408	4.334	2.481	0.922	23.5	28.713	38.837	7.175	0.581	0.071	0.144	0.532	2.17	4.169	3.328	1.57	0.733	0.321	0.316	10.635	11.265	1.725	1.584	0.914	6.124	1.802	0.711	33.549	4.272	8.85	18.151	16.682	38.535	21.985	5.099	3.667	16.25	0.309
PtrLAC44	0.701	0.918	0.94	8.961	3.988	2.189	2.505	2.052	3.068	14.458	0.127	0.087	0.024	0.46	3.71	8.281	7.443	2.566	1.776	0.753	0.636	0.498	0.355	0.117	0.008	0.156	0.057	0.01	0.034	19.061	0.026	13.03	12.009	19.662	1.003	1.021	0.349	1.138	0.996	0.448
PtrLAC45	0.564	0.788	0.433	6.265	2.799	1.038	0.813	0.797	0.799	1.046	0.05	0.091	0.055	0.52	2.429	5.048	4.068	1.704	0.758	0.5	0.372	0.259	0.168	0.058	0.028	0.052	0.056	0.007	0.008	2.698	0.025	2.564	2.259	5.16	0.33	0.142	0.126	0.608	0.305	0.156
PtrLAC46	0.124	0.23	0.101	1.787	0.724	0.2	1.528	1.3	2.145	2.249	0.351	0.026	0	0.146	0.901	0.818	1.271	0.618	0.408	0.083	0.111	0.463	0.429	0.118	0.078	0.133	0.077	0.127	0.049	4.894	0.116	4.041	3.654	22.23	0.51	0.239	0.156	1.083	0.511	0.206
PtrLAC47	0.931	1.49	1.031	11.302	5.659	2.097	1.492	1.82	1.954	0.866	0.024	0.285	0.167	0.705	5.145	10.905	9.516	2.699	1.691	1.176	0.608	0.293	0.325	0.061	0.077	0.03	0.044	0.043	0.007	3.836	0.102	1.306	1.194	5.83	1.77	0.421	0.187	0.708	0.706	0.138
PtrLAC48	0.021	0.079	0.373	0.021	0.024	0	0.057	0.07	0.377	0	0	0	0	0.168	0	0.049	0.02	0.013	0	0.013	0	0.028	0.002	0	0	0.008	0.006	0	0.004	0.592	0.018	0.011	0.94	0.391	0.041	0.057	0.035	0.015	0.007	0.02
PtrLAC53	0.098	0.192	0.398	0	0.021	0	0.164	0.263	1.099	0.009	0.017	0.025	0.104	0.293	0	0	0.051	0.029	0	0.016	0.036	0.256	0.024	0	0.064	0.025	0.025	0.043	0.007	1.85	0.04	4.222	3.099	1.187	0.048	0	0.015	0.094	0.058	0.08
PtrLAC16	0.022	0.089	0.069	0	0.048	0	2.35	0.565	0.145	0.28	0.183	0	0.159	0.125	0.083	0	0.026	0.013	0	0	0	0.276	0.233	1.497	0.68	0.365	0.153	0.242	0.309	4.032	0.24	8.471	15.407	21.678	0.23	0.504	0.305	0.148	0.18	0.34
