# Supplementary material for: Genome-wide analysis of the Populus trichocarpa laccase gene family and functional identification of PtrLAC23
Source: Front Plant Sci. 2023 Jan 17;13:1063813. doi: 10.3389/fpls.2022.1063813 (PMC9887407; doi:10.3389/fpls.2022.1063813)
Supplement: Supplementary file 5 [file Table_3.xlsx]

## Sheet: Sheet1
seq id	alignment start	alignment end	envelope start	envelope end	hmm acc	hmm name	type	hmm start	hmm end	hmm length	bit score	E-value	significance	clan
PtrLAC12	39	152	37	153	PF07732.15	Cu-oxidase_3	Domain	3	118	119	141.8	9.6e-42	1	CL0026
PtrLAC12	164	315	163	316	PF00394.22	Cu-oxidase	Domain	2	158	159	147.7	2.9e-43	1	CL0026
PtrLAC12	430	562	428	563	PF07731.14	Cu-oxidase_2	Domain	2	136	137	137.8	1.9e-40	1	CL0026
PtrLAC8	39	152	38	154	PF07732.15	Cu-oxidase_3	Domain	2	117	119	143.1	3.6e-42	1	CL0026
PtrLAC8	166	314	164	315	PF00394.22	Cu-oxidase	Domain	3	158	159	145.4	1.6e-42	1	CL0026
PtrLAC8	271	305	271	310	PF18693.1	TRAM_2	Domain	2	32	64	7.6	4.1	0	CL0021
PtrLAC8	414	546	413	548	PF07731.14	Cu-oxidase_2	Domain	2	135	137	134.8	1.6e-39	1	CL0026
PtrLAC22	36	149	35	151	PF07732.15	Cu-oxidase_3	Domain	2	117	119	143.6	2.5e-42	1	CL0026
PtrLAC22	50	76	28	84	PF01176.19	eIF-1a	Domain	28	53	64	11.4	0.22	0	CL0021
PtrLAC22	164	311	161	312	PF00394.22	Cu-oxidase	Domain	4	158	159	147.9	2.6e-43	1	CL0026
PtrLAC22	411	544	410	545	PF07731.14	Cu-oxidase_2	Domain	2	136	137	137.3	2.7e-40	1	CL0026
PtrLAC17	37	151	36	152	PF07732.15	Cu-oxidase_3	Domain	2	118	119	144.3	1.6e-42	1	CL0026
PtrLAC17	51	79	28	87	PF01176.19	eIF-1a	Domain	28	55	64	13.3	0.056	0	CL0021
PtrLAC17	164	312	162	313	PF00394.22	Cu-oxidase	Domain	3	158	159	146.1	9.2e-43	1	CL0026
PtrLAC17	412	544	411	546	PF07731.14	Cu-oxidase_2	Domain	2	135	137	136.4	5.1e-40	1	CL0026
PtrLAC49	34	146	32	148	PF07732.15	Cu-oxidase_3	Domain	3	117	119	136.7	3.5e-40	1	CL0026
PtrLAC49	71	87	71	88	PF04807.12	Gemini_AC4_5	Family	12	28	33	7.2	4.1	0	No_clan
PtrLAC49	159	309	158	309	PF00394.22	Cu-oxidase	Domain	2	159	159	151.7	1.8e-44	1	CL0026
PtrLAC49	410	542	409	543	PF07731.14	Cu-oxidase_2	Domain	2	136	137	139.7	4.9e-41	1	CL0026
PtrLAC15	34	146	32	148	PF07732.15	Cu-oxidase_3	Domain	3	117	119	136.3	4.7e-40	1	CL0026
PtrLAC15	71	87	71	88	PF04807.12	Gemini_AC4_5	Family	12	28	33	7.2	4.1	0	No_clan
PtrLAC15	159	309	158	309	PF00394.22	Cu-oxidase	Domain	2	159	159	151.3	2.3e-44	1	CL0026
PtrLAC15	410	542	409	543	PF07731.14	Cu-oxidase_2	Domain	2	136	137	139.7	4.9e-41	1	CL0026
PtrLAC14	33	145	31	147	PF07732.15	Cu-oxidase_3	Domain	3	117	119	137.9	1.5e-40	1	CL0026
PtrLAC14	70	86	70	87	PF04807.12	Gemini_AC4_5	Family	12	28	33	7.2	4.1	0	No_clan
PtrLAC14	158	308	157	308	PF00394.22	Cu-oxidase	Domain	2	159	159	152.9	7.4e-45	1	CL0026
PtrLAC14	409	541	408	542	PF07731.14	Cu-oxidase_2	Domain	2	136	137	139.7	4.9e-41	1	CL0026
PtrLAC41	32	144	30	145	PF07732.15	Cu-oxidase_3	Domain	3	117	119	133.9	2.6e-39	1	CL0026
PtrLAC41	157	307	156	307	PF00394.22	Cu-oxidase	Domain	2	159	159	155.6	1.1e-45	1	CL0026
PtrLAC41	408	540	407	541	PF07731.14	Cu-oxidase_2	Domain	2	136	137	140.9	2e-41	1	CL0026
PtrLAC42	39	151	37	153	PF07732.15	Cu-oxidase_3	Domain	3	117	119	136.7	3.6e-40	1	CL0026
PtrLAC42	164	314	163	314	PF00394.22	Cu-oxidase	Domain	2	159	159	150.3	4.6e-44	1	CL0026
PtrLAC42	415	547	414	548	PF07731.14	Cu-oxidase_2	Domain	2	136	137	138.3	1.3e-40	1	CL0026
PtrLAC4	34	146	32	148	PF07732.15	Cu-oxidase_3	Domain	3	117	119	135.5	8.6e-40	1	CL0026
PtrLAC4	160	308	158	309	PF00394.22	Cu-oxidase	Domain	3	158	159	154.3	2.8e-45	1	CL0026
PtrLAC4	408	540	407	541	PF07731.14	Cu-oxidase_2	Domain	2	136	137	134.1	2.6e-39	1	CL0026
PtrLAC21	33	145	31	147	PF07732.15	Cu-oxidase_3	Domain	3	117	119	140.4	2.6e-41	1	CL0026
PtrLAC21	158	307	157	308	PF00394.22	Cu-oxidase	Domain	2	158	159	149.7	7.3e-44	1	CL0026
PtrLAC21	407	539	406	540	PF07731.14	Cu-oxidase_2	Domain	2	136	137	135.5	9.7e-40	1	CL0026
PtrLAC50	35	148	33	149	PF07732.15	Cu-oxidase_3	Domain	3	118	119	134.6	1.6e-39	1	CL0026
PtrLAC50	160	311	159	311	PF00394.22	Cu-oxidase	Domain	2	159	159	140.4	5.3e-41	1	CL0026
PtrLAC50	434	548	414	550	PF07731.14	Cu-oxidase_2	Domain	25	135	137	128.2	1.7e-37	1	CL0026
PtrLAC9	35	148	33	149	PF07732.15	Cu-oxidase_3	Domain	3	118	119	134.7	1.4e-39	1	CL0026
PtrLAC9	160	311	159	311	PF00394.22	Cu-oxidase	Domain	2	159	159	139	1.4e-40	1	CL0026
PtrLAC9	434	548	414	550	PF07731.14	Cu-oxidase_2	Domain	25	135	137	128.5	1.4e-37	1	CL0026
PtrLAC28	31	144	29	145	PF07732.15	Cu-oxidase_3	Domain	3	118	119	134	2.4e-39	1	CL0026
PtrLAC28	156	307	155	307	PF00394.22	Cu-oxidase	Domain	2	159	159	137.7	3.7e-40	1	CL0026
PtrLAC28	432	544	410	546	PF07731.14	Cu-oxidase_2	Domain	27	135	137	130.7	3e-38	1	CL0026
PtrLAC10	34	146	32	148	PF07732.15	Cu-oxidase_3	Domain	3	117	119	123.9	3.3e-36	1	CL0026
PtrLAC10	161	310	160	311	PF00394.22	Cu-oxidase	Domain	3	158	159	124.2	5.1e-36	1	CL0026
PtrLAC10	438	549	415	551	PF07731.14	Cu-oxidase_2	Domain	28	135	137	128.5	1.4e-37	1	CL0026
PtrLAC3	34	146	32	148	PF07732.15	Cu-oxidase_3	Domain	3	117	119	135.2	1.1e-39	1	CL0026
PtrLAC3	160	305	158	306	PF00394.22	Cu-oxidase	Domain	7	158	159	119.5	1.4e-34	1	CL0026
PtrLAC3	408	541	407	543	PF07731.14	Cu-oxidase_2	Domain	2	135	137	138.9	8.6e-41	1	CL0026
PtrLAC43	38	150	36	152	PF07732.15	Cu-oxidase_3	Domain	3	117	119	140.4	2.5e-41	1	CL0026
PtrLAC43	164	314	162	314	PF00394.22	Cu-oxidase	Domain	3	159	159	129.9	8.8e-38	1	CL0026
PtrLAC43	418	549	415	550	PF07731.14	Cu-oxidase_2	Domain	4	136	137	122.9	7.2e-36	1	CL0026
PtrLAC43	464	492	411	555	PF05140.14	ResB	Family	246	273	495	11	0.12	0	No_clan
PtrLAC44	38	150	36	152	PF07732.15	Cu-oxidase_3	Domain	3	117	119	140.4	2.5e-41	1	CL0026
PtrLAC44	164	314	162	314	PF00394.22	Cu-oxidase	Domain	3	159	159	129	1.7e-37	1	CL0026
PtrLAC44	417	548	415	550	PF07731.14	Cu-oxidase_2	Domain	3	135	137	125.9	8.7e-37	1	CL0026
PtrLAC44	464	493	440	537	PF05140.14	ResB	Family	246	274	495	10.6	0.17	0	No_clan
PtrLAC45	38	150	36	152	PF07732.15	Cu-oxidase_3	Domain	3	117	119	140.4	2.5e-41	1	CL0026
PtrLAC45	164	314	162	314	PF00394.22	Cu-oxidase	Domain	3	159	159	124.5	4.2e-36	1	CL0026
PtrLAC45	417	548	415	550	PF07731.14	Cu-oxidase_2	Domain	3	135	137	125.4	1.3e-36	1	CL0026
PtrLAC45	464	493	412	537	PF05140.14	ResB	Family	246	274	495	10.9	0.14	0	No_clan
PtrLAC46	38	150	36	152	PF07732.15	Cu-oxidase_3	Domain	3	117	119	140.4	2.5e-41	1	CL0026
PtrLAC46	164	314	162	314	PF00394.22	Cu-oxidase	Domain	3	159	159	127.3	5.6e-37	1	CL0026
PtrLAC46	259	312	251	329	PF16974.5	NAR2	Family	83	139	174	10.1	0.39	0	No_clan
PtrLAC46	417	548	415	550	PF07731.14	Cu-oxidase_2	Domain	3	135	137	125.5	1.2e-36	1	CL0026
PtrLAC46	464	493	425	539	PF05140.14	ResB	Family	246	274	495	10.7	0.16	0	No_clan
PtrLAC47	38	150	36	152	PF07732.15	Cu-oxidase_3	Domain	3	117	119	140.4	2.5e-41	1	CL0026
PtrLAC47	164	314	162	314	PF00394.22	Cu-oxidase	Domain	3	159	159	129.4	1.2e-37	1	CL0026
PtrLAC47	259	311	251	328	PF16974.5	NAR2	Family	83	138	174	10.2	0.37	0	No_clan
PtrLAC47	417	548	415	550	PF07731.14	Cu-oxidase_2	Domain	3	135	137	125.9	8.7e-37	1	CL0026
PtrLAC47	464	493	440	537	PF05140.14	ResB	Family	246	274	495	10.6	0.17	0	No_clan
PtrLAC25	44	157	42	158	PF07732.15	Cu-oxidase_3	Domain	3	118	119	150.6	1.7e-44	1	CL0026
PtrLAC25	170	320	169	321	PF00394.22	Cu-oxidase	Domain	2	158	159	130.7	5e-38	1	CL0026
PtrLAC25	432	564	431	566	PF07731.14	Cu-oxidase_2	Domain	2	135	137	139.5	5.6e-41	1	CL0026
PtrLAC19	39	153	38	154	PF07732.15	Cu-oxidase_3	Domain	2	118	119	150.9	1.4e-44	1	CL0026
PtrLAC19	165	314	164	316	PF00394.22	Cu-oxidase	Domain	2	157	159	134.4	3.8e-39	1	CL0026
PtrLAC19	424	556	423	557	PF07731.14	Cu-oxidase_2	Domain	2	135	137	138.5	1.1e-40	1	CL0026
PtrLAC26	40	154	39	155	PF07732.15	Cu-oxidase_3	Domain	2	118	119	149.9	2.9e-44	1	CL0026
PtrLAC26	166	316	165	317	PF00394.22	Cu-oxidase	Domain	2	158	159	135.4	1.8e-39	1	CL0026
PtrLAC26	425	557	424	558	PF07731.14	Cu-oxidase_2	Domain	2	135	137	139.4	6e-41	1	CL0026
PtrLAC48	42	154	40	156	PF07732.15	Cu-oxidase_3	Domain	3	117	119	143.9	2.1e-42	1	CL0026
PtrLAC48	168	316	166	317	PF00394.22	Cu-oxidase	Domain	3	158	159	133.4	7.5e-39	1	CL0026
PtrLAC48	426	558	425	560	PF07731.14	Cu-oxidase_2	Domain	2	135	137	135.6	9.1e-40	1	CL0026
PtrLAC53	42	154	40	156	PF07732.15	Cu-oxidase_3	Domain	3	117	119	143.9	2.1e-42	1	CL0026
PtrLAC53	168	316	166	317	PF00394.22	Cu-oxidase	Domain	3	158	159	133.4	7.5e-39	1	CL0026
PtrLAC53	426	558	425	560	PF07731.14	Cu-oxidase_2	Domain	2	135	137	137.1	3e-40	1	CL0026
PtrLAC32	42	154	40	156	PF07732.15	Cu-oxidase_3	Domain	3	117	119	143.5	2.8e-42	1	CL0026
PtrLAC32	168	316	166	317	PF00394.22	Cu-oxidase	Domain	3	158	159	141.9	1.8e-41	1	CL0026
PtrLAC32	426	558	425	560	PF07731.14	Cu-oxidase_2	Domain	2	135	137	134	2.7e-39	1	CL0026
PtrLAC38	33	145	30	146	PF07732.15	Cu-oxidase_3	Domain	4	118	119	135.1	1.1e-39	1	CL0026
PtrLAC38	157	316	156	316	PF00394.22	Cu-oxidase	Domain	2	159	159	133.8	5.5e-39	1	CL0026
PtrLAC38	170	248	160	262	PF16253.5	DUF4909	Family	24	103	127	10.7	0.36	0	No_clan
PtrLAC38	416	551	415	553	PF07731.14	Cu-oxidase_2	Domain	2	135	137	135.3	1.1e-39	1	CL0026
PtrLAC40	32	145	30	146	PF07732.15	Cu-oxidase_3	Domain	3	118	119	136	5.8e-40	1	CL0026
PtrLAC40	157	316	156	316	PF00394.22	Cu-oxidase	Domain	2	159	159	134.2	4.3e-39	1	CL0026
PtrLAC40	170	248	160	262	PF16253.5	DUF4909	Family	24	103	127	10.6	0.37	0	No_clan
PtrLAC40	416	551	415	553	PF07731.14	Cu-oxidase_2	Domain	2	135	137	133.3	4.5e-39	1	CL0026
PtrLAC39	32	145	30	146	PF07732.15	Cu-oxidase_3	Domain	3	118	119	137.3	2.3e-40	1	CL0026
PtrLAC39	157	309	156	309	PF00394.22	Cu-oxidase	Domain	2	159	159	138.4	2.1e-40	1	CL0026
PtrLAC39	187	248	167	262	PF16253.5	DUF4909	Family	41	103	127	14.2	0.029	0	No_clan
PtrLAC39	409	544	408	546	PF07731.14	Cu-oxidase_2	Domain	2	135	137	138.9	8.7e-41	1	CL0026
PtrLAC37	31	145	30	146	PF07732.15	Cu-oxidase_3	Domain	2	118	119	137.8	1.6e-40	1	CL0026
PtrLAC37	157	315	156	315	PF00394.22	Cu-oxidase	Domain	2	159	159	133.7	6.1e-39	1	CL0026
PtrLAC37	415	550	414	552	PF07731.14	Cu-oxidase_2	Domain	2	135	137	131	2.3e-38	1	CL0026
PtrLAC52	31	145	30	146	PF07732.15	Cu-oxidase_3	Domain	2	118	119	137.8	1.6e-40	1	CL0026
PtrLAC52	157	315	156	315	PF00394.22	Cu-oxidase	Domain	2	159	159	133.7	6.1e-39	1	CL0026
PtrLAC52	415	550	414	552	PF07731.14	Cu-oxidase_2	Domain	2	135	137	134	2.7e-39	1	CL0026
PtrLAC13	32	145	30	146	PF07732.15	Cu-oxidase_3	Domain	3	118	119	138.1	1.3e-40	1	CL0026
PtrLAC13	157	308	156	308	PF00394.22	Cu-oxidase	Domain	2	159	159	145.1	1.9e-42	1	CL0026
PtrLAC13	408	544	407	546	PF07731.14	Cu-oxidase_2	Domain	2	135	137	142.3	7.8e-42	1	CL0026
PtrLAC16	9	34	3	40	PF01891.16	CbiM	Family	36	61	207	11.4	0.21	0	CL0315
PtrLAC16	41	84	37	115	PF14568.6	SUKH_6	Domain	6	49	121	10.6	0.56	0	CL0526
PtrLAC16	45	156	43	160	PF07732.15	Cu-oxidase_3	Domain	3	115	119	132.5	6.9e-39	1	CL0026
PtrLAC16	172	332	170	333	PF00394.22	Cu-oxidase	Domain	4	158	159	156.3	6.6e-46	1	CL0026
PtrLAC16	435	559	414	562	PF07731.14	Cu-oxidase_2	Domain	20	134	137	130.2	4.2e-38	1	CL0026
PtrLAC33	41	154	40	156	PF07732.15	Cu-oxidase_3	Domain	2	117	119	132.6	6.8e-39	1	CL0026
PtrLAC33	166	317	166	318	PF00394.22	Cu-oxidase	Domain	1	158	159	134	5e-39	1	CL0026
PtrLAC33	441	555	422	556	PF07731.14	Cu-oxidase_2	Domain	24	136	137	129.2	8.4e-38	1	CL0026
PtrLAC51	9	51	3	52	PF07732.15	Cu-oxidase_3	Domain	74	117	119	36.2	5e-09	1	CL0026
PtrLAC51	64	216	62	216	PF00394.22	Cu-oxidase	Domain	3	159	159	114.9	3.7e-33	1	CL0026
PtrLAC51	330	462	328	464	PF07731.14	Cu-oxidase_2	Domain	3	135	137	139.6	5.1e-41	1	CL0026
PtrLAC36	48	133	29	135	PF07732.15	Cu-oxidase_3	Domain	31	117	119	107.7	3.6e-31	1	CL0026
PtrLAC36	146	298	144	298	PF00394.22	Cu-oxidase	Domain	3	159	159	114.6	4.6e-33	1	CL0026
PtrLAC36	414	527	390	528	PF07731.14	Cu-oxidase_2	Domain	27	136	137	132.5	7.8e-39	1	CL0026
PtrLAC35	37	150	36	151	PF07732.15	Cu-oxidase_3	Domain	2	117	119	145.8	5.3e-43	1	CL0026
PtrLAC35	163	315	161	315	PF00394.22	Cu-oxidase	Domain	3	159	159	124.9	3.2e-36	1	CL0026
PtrLAC35	428	562	427	563	PF07731.14	Cu-oxidase_2	Domain	2	136	137	141.5	1.3e-41	1	CL0026
PtrLAC34	37	150	36	151	PF07732.15	Cu-oxidase_3	Domain	2	117	119	146.8	2.7e-43	1	CL0026
PtrLAC34	163	315	161	315	PF00394.22	Cu-oxidase	Domain	3	159	159	127.6	4.7e-37	1	CL0026
PtrLAC34	428	562	427	563	PF07731.14	Cu-oxidase_2	Domain	2	136	137	143.8	2.6e-42	1	CL0026
PtrLAC31	37	150	36	152	PF07732.15	Cu-oxidase_3	Domain	2	117	119	145.1	8.9e-43	1	CL0026
PtrLAC31	163	315	161	315	PF00394.22	Cu-oxidase	Domain	3	159	159	125.2	2.5e-36	1	CL0026
PtrLAC31	428	562	427	563	PF07731.14	Cu-oxidase_2	Domain	2	136	137	142.2	8.2e-42	1	CL0026
PtrLAC29	43	152	39	154	PF07732.15	Cu-oxidase_3	Domain	5	116	119	140.3	2.7e-41	1	CL0026
PtrLAC29	166	316	165	318	PF00394.22	Cu-oxidase	Domain	2	157	159	139.9	7.5e-41	1	CL0026
PtrLAC29	445	563	416	565	PF07731.14	Cu-oxidase_2	Domain	23	135	137	134.2	2.5e-39	1	CL0026
PtrLAC30	43	152	39	154	PF07732.15	Cu-oxidase_3	Domain	5	116	119	138.7	8.5e-41	1	CL0026
PtrLAC30	166	316	165	318	PF00394.22	Cu-oxidase	Domain	2	157	159	139.8	8.2e-41	1	CL0026
PtrLAC30	442	563	416	565	PF07731.14	Cu-oxidase_2	Domain	12	135	137	134.7	1.7e-39	1	CL0026
PtrLAC6	43	153	39	154	PF07732.15	Cu-oxidase_3	Domain	5	117	119	137.1	2.7e-40	1	CL0026
PtrLAC6	166	316	165	318	PF00394.22	Cu-oxidase	Domain	2	157	159	142.1	1.6e-41	1	CL0026
PtrLAC6	442	563	426	565	PF07731.14	Cu-oxidase_2	Domain	12	135	137	138.1	1.5e-40	1	CL0026
PtrLAC7	43	153	39	154	PF07732.15	Cu-oxidase_3	Domain	5	117	119	140.8	2e-41	1	CL0026
PtrLAC7	166	318	165	318	PF00394.22	Cu-oxidase	Domain	2	159	159	141.6	2.2e-41	1	CL0026
PtrLAC7	443	563	414	565	PF07731.14	Cu-oxidase_2	Domain	23	135	137	133.8	3.2e-39	1	CL0026
PtrLAC1	43	153	39	154	PF07732.15	Cu-oxidase_3	Domain	5	117	119	141.2	1.4e-41	1	CL0026
PtrLAC1	166	318	165	318	PF00394.22	Cu-oxidase	Domain	2	159	159	147.3	4.1e-43	1	CL0026
PtrLAC1	438	563	412	565	PF07731.14	Cu-oxidase_2	Domain	8	135	137	133.3	4.7e-39	1	CL0026
PtrLAC5	40	152	38	154	PF07732.15	Cu-oxidase_3	Domain	3	117	119	141.1	1.5e-41	1	CL0026
PtrLAC5	40	58	38	58	PF17219.3	YAF2_RYBP	Motif	3	21	33	9.4	0.75	0	No_clan
PtrLAC5	165	315	164	317	PF00394.22	Cu-oxidase	Domain	2	157	159	139.1	1.3e-40	1	CL0026
PtrLAC5	444	562	428	564	PF07731.14	Cu-oxidase_2	Domain	23	135	137	135.2	1.2e-39	1	CL0026
PtrLAC23	46	158	44	160	PF07732.15	Cu-oxidase_3	Domain	3	117	119	138.8	7.9e-41	1	CL0026
PtrLAC23	171	322	170	323	PF00394.22	Cu-oxidase	Domain	2	158	159	141.2	2.9e-41	1	CL0026
PtrLAC23	440	557	418	560	PF07731.14	Cu-oxidase_2	Domain	23	134	137	133.2	4.9e-39	1	CL0026
PtrLAC24	46	158	44	160	PF07732.15	Cu-oxidase_3	Domain	3	117	119	138.8	8.2e-41	1	CL0026
PtrLAC24	171	322	170	323	PF00394.22	Cu-oxidase	Domain	2	158	159	141.7	2.1e-41	1	CL0026
PtrLAC24	440	557	418	560	PF07731.14	Cu-oxidase_2	Domain	23	134	137	133.2	4.9e-39	1	CL0026
PtrLAC2	46	158	44	160	PF07732.15	Cu-oxidase_3	Domain	3	117	119	139.5	4.8e-41	1	CL0026
PtrLAC2	46	64	45	64	PF17219.3	YAF2_RYBP	Motif	3	21	33	11	0.25	0	No_clan
PtrLAC2	171	322	170	323	PF00394.22	Cu-oxidase	Domain	2	158	159	141.4	2.5e-41	1	CL0026
PtrLAC2	440	557	418	560	PF07731.14	Cu-oxidase_2	Domain	23	134	137	131.3	1.9e-38	1	CL0026
PtrLAC20	46	158	44	160	PF07732.15	Cu-oxidase_3	Domain	3	117	119	138.9	7.6e-41	1	CL0026
PtrLAC20	171	322	170	323	PF00394.22	Cu-oxidase	Domain	2	158	159	143.6	5.5e-42	1	CL0026
PtrLAC20	440	557	419	560	PF07731.14	Cu-oxidase_2	Domain	23	134	137	136	6.5e-40	1	CL0026
PtrLAC11	42	155	41	157	PF07732.15	Cu-oxidase_3	Domain	2	117	119	139.8	4e-41	1	CL0026
PtrLAC11	168	319	167	320	PF00394.22	Cu-oxidase	Domain	2	158	159	148.4	1.9e-43	1	CL0026
PtrLAC11	436	561	423	564	PF07731.14	Cu-oxidase_2	Domain	7	134	137	132.9	6.3e-39	1	CL0026
PtrLAC27	35	145	30	146	PF07732.15	Cu-oxidase_3	Domain	6	118	119	137.1	2.7e-40	1	CL0026
PtrLAC27	158	305	156	306	PF00394.22	Cu-oxidase	Domain	3	158	159	148.2	2.1e-43	1	CL0026
PtrLAC27	405	538	404	539	PF07731.14	Cu-oxidase_2	Domain	2	136	137	141.7	1.2e-41	1	CL0026
PtrLAC18	35	146	31	147	PF07732.15	Cu-oxidase_3	Domain	5	118	119	139.1	6.4e-41	1	CL0026
PtrLAC18	159	306	157	307	PF00394.22	Cu-oxidase	Domain	3	158	159	147.1	4.7e-43	1	CL0026
PtrLAC18	407	539	405	540	PF07731.14	Cu-oxidase_2	Domain	3	136	137	138.1	1.6e-40	1	CL0026
