# Supplementary material for: Genome-wide analysis of the Populus trichocarpa laccase gene family and functional identification of PtrLAC23
Source: Front Plant Sci. 2023 Jan 17;13:1063813. doi: 10.3389/fpls.2022.1063813 (PMC9887407; doi:10.3389/fpls.2022.1063813)
Supplement: Supplementary file 6 [file Table_4.xlsx]

## Sheet: Sheet1
motif_1	DPKKFNLVDPPERNTVGVPSGGWAAIRFKADNPGVWFMHCHLEVHTSWGL
motif_2	HWHGVRQLRSGWADGPAYITQCPIQPGQSYTYNFTITGQRG
motif_3	GKTYLLRIINAALNDELFFSIANHTLTVVEVDAVYTKPFTTDTIMIAPGQ
motif_4	GEWWNADVEAVINZALATGGGPNVSDAYTINGLPGPLYNCS
motif_5	GTKLYVLPYNSTVEJVLQDTSILGVENHPJHLHGFNFFVVGQGFGNFBPK
motif_6	TRLCSTKSIVTVNGKFPGPTJYAREGDTLLVKVVNHVPYN
motif_7	TLWWHAHISWLRATVYGAJIILPKRGTPY
motif_8	CQGPNGTRFAASMNNVSFVMP
motif_9	VENGKGPNQSLLPPPADLPKC
motif_10	NVPQTIDRRLFFTVGLGJNPC
motif_11	ISGVFTTDFPDKPPVPFBYTG
motif_12	LPAFNDTAFATNFTSKLRSLA
motif_13	PFDNTTTTAILZYKGA
motif_14	QPPGKYYMAARPYAS
motif_15	PFPKPHKEVPI
