# Supplementary material for: Genome-wide analysis of the Populus trichocarpa laccase gene family and functional identification of PtrLAC23
Source: Front Plant Sci. 2023 Jan 17;13:1063813. doi: 10.3389/fpls.2022.1063813 (PMC9887407; doi:10.3389/fpls.2022.1063813)
Supplement: Supplementary file 7 [file Table_5.xlsx]

## Sheet: Sheet1
Potri.001G054600.1.v3.0	PtrLAC1	G-box	TAAACGTG	173	193	218	8	-	Brassica oleracea	light responsiveness
Potri.001G054600.1.v3.0	PtrLAC1	MRE	AACCTAA	1337	1357	1382	7	+	Petroselinum crispum	MYB binding site involved in light responsiveness
Potri.001G054600.1.v3.0	PtrLAC1	MRE	AACCTAA	1928	1948	1973	7	-	Petroselinum crispum	MYB binding site involved in light responsiveness
Potri.001G054600.1.v3.0	PtrLAC1	AuxRR-core	GGTCCAT	295	315	340	7	+	Nicotiana tabacum	auxin responsiveness
Potri.001G054600.1.v3.0	PtrLAC1	TCCC-motif	TCTCCCT	1017	1037	1062	7	-	Spinacia oleracea	light responsiveness
Potri.001G054600.1.v3.0	PtrLAC1	TCT-motif	TCTTAC	1251	1271	1296	6	+	Arabidopsis thaliana	light responsiveness
Potri.001G054600.1.v3.0	PtrLAC1	GT1-motif	GGTTAAT	25	45	70	7	+	Avena sativa	light responsiveness
Potri.001G054600.1.v3.0	PtrLAC1	GT1-motif	GGTTAA	1272	1292	1317	6	+	Arabidopsis thaliana	light responsiveness
Potri.001G054600.1.v3.0	PtrLAC1	Box 4	ATTAAT	873	893	918	6	+	Petroselinum crispum	light responsiveness
Potri.001G054600.1.v3.0	PtrLAC1	Box 4	ATTAAT	1032	1052	1077	6	-	Petroselinum crispum	light responsiveness
Potri.001G054600.1.v3.0	PtrLAC1	ABRE	ACGTG	173	193	218	5	-	Arabidopsis thaliana	abscisic acid responsiveness
Potri.001G054600.1.v3.0	PtrLAC1	TC-rich repeats	ATTCTCTAAC	761	781	806	9	-	Nicotiana tabacum	defense and stress responsiveness
Potri.001G054600.1.v3.0	PtrLAC1	CGTCA-motif	CGTCA	990	1010	1035	5	-	Hordeum vulgare	MeJA-responsiveness
Potri.001G054600.1.v3.0	PtrLAC1	G-Box	CACGTT	173	193	218	6	+	Pisum sativum	light responsiveness
Potri.001G054600.1.v3.0	PtrLAC1	I-box	atGATAAGGTC	288	308	333	10	+	Helianthus annuus	light responsiveness
Potri.001G054600.1.v3.0	PtrLAC1	GARE-motif	TCTGTTG	199	219	244	7	-	Brassica oleracea	gibberellin-responsiveness
Potri.001G054600.1.v3.0	PtrLAC1	LAMP-element	CTTTATCA	1221	1241	1266	8	+	Pisum sativum	light responsiveness
Potri.001G054600.1.v3.0	PtrLAC1	P-box	CCTTTTG	311	331	356	7	-	Oryza sativa	gibberellin-responsiveness
Potri.001G054600.1.v3.0	PtrLAC1	P-box	CCTTTTG	515	535	560	7	+	Oryza sativa	gibberellin-responsiveness
Potri.001G054600.1.v3.0	PtrLAC1	MBS	CAACTG	421	441	466	6	-	Arabidopsis thaliana	drought-inducibility
Potri.001G054600.1.v3.0	PtrLAC1	MBS	CAACTG	491	511	536	6	+	Arabidopsis thaliana	drought-inducibility
Potri.001G054600.1.v3.0	PtrLAC1	MBS	CAACTG	1557	1577	1602	6	+	Arabidopsis thaliana	drought-inducibility
Potri.001G054600.1.v3.0	PtrLAC1	TGACG-motif	TGACG	990	1010	1035	5	+	Hordeum vulgare	MeJA-responsiveness
Potri.001G184300.1.v3.0	PtrLAC2	TCT-motif	TCTTAC	1877	1897	1922	6	-	Arabidopsis thaliana	light responsiveness
Potri.001G184300.1.v3.0	PtrLAC2	GT1-motif	GGTTAA	893	913	938	6	+	Arabidopsis thaliana	light responsiveness
Potri.001G184300.1.v3.0	PtrLAC2	GT1-motif	GGTTAAT	1596	1616	1641	7	-	Avena sativa	light responsiveness
Potri.001G184300.1.v3.0	PtrLAC2	GT1-motif	GGTTAA	1597	1617	1642	6	-	Arabidopsis thaliana	light responsiveness
Potri.001G184300.1.v3.0	PtrLAC2	GA-motif	ATAGATAA	421	441	466	8	-	Arabidopsis thaliana	light responsiveness
Potri.001G184300.1.v3.0	PtrLAC2	Box II	TGGTAATAA	1451	1471	1496	9	+	Solanum tuberosum	light responsiveness
Potri.001G184300.1.v3.0	PtrLAC2	Box 4	ATTAAT	276	296	321	6	+	Petroselinum crispum	light responsiveness
Potri.001G184300.1.v3.0	PtrLAC2	Box 4	ATTAAT	560	580	605	6	+	Petroselinum crispum	light responsiveness
Potri.001G184300.1.v3.0	PtrLAC2	Box 4	ATTAAT	819	839	864	6	+	Petroselinum crispum	light responsiveness
Potri.001G184300.1.v3.0	PtrLAC2	Box 4	ATTAAT	925	945	970	6	+	Petroselinum crispum	light responsiveness
Potri.001G184300.1.v3.0	PtrLAC2	Box 4	ATTAAT	970	990	1015	6	+	Petroselinum crispum	light responsiveness
Potri.001G184300.1.v3.0	PtrLAC2	Box 4	ATTAAT	1694	1714	1739	6	-	Petroselinum crispum	light responsiveness
Potri.001G184300.1.v3.0	PtrLAC2	ABRE	ACGTG	29	49	74	5	+	Arabidopsis thaliana	abscisic acid responsiveness
Potri.001G184300.1.v3.0	PtrLAC2	CGTCA-motif	CGTCA	340	360	385	5	+	Hordeum vulgare	MeJA-responsiveness
Potri.001G184300.1.v3.0	PtrLAC2	chs-CMA1a	TTACTTAA	225	245	270	8	+	Daucus carota	light responsiveness
Potri.001G184300.1.v3.0	PtrLAC2	GATA-motif	GATAGGA	1919	1939	1964	7	-	Arabidopsis thaliana	light responsiveness
Potri.001G184300.1.v3.0	PtrLAC2	MBS	CAACTG	542	562	587	6	-	Arabidopsis thaliana	drought-inducibility
Potri.001G184300.1.v3.0	PtrLAC2	TGACG-motif	TGACG	340	360	385	5	-	Hordeum vulgare	MeJA-responsiveness
Potri.001G184300.1.v3.0	PtrLAC2	P-box	CCTTTTG	360	380	405	7	-	Oryza sativa	gibberellin-responsiveness
Potri.001G184300.1.v3.0	PtrLAC2	G-Box	CACGTT	28	48	73	6	-	Pisum sativum	light responsiveness
Potri.001G206200.1.v3.0	PtrLAC3	ATCT-motif	AATCTAATCC	466	486	511	9	-	Pisum sativum	light responsiveness
Potri.001G206200.1.v3.0	PtrLAC3	ATCT-motif	AATCTAATCC	1688	1708	1733	9	+	Pisum sativum	light responsiveness
Potri.001G206200.1.v3.0	PtrLAC3	LTR	CCGAAA	1563	1583	1608	6	+	Hordeum vulgare	low-temperature responsiveness
Potri.001G206200.1.v3.0	PtrLAC3	CGTCA-motif	CGTCA	1653	1673	1698	5	-	Hordeum vulgare	MeJA-responsiveness
Potri.001G206200.1.v3.0	PtrLAC3	CGTCA-motif	CGTCA	1905	1925	1950	5	-	Hordeum vulgare	MeJA-responsiveness
Potri.001G206200.1.v3.0	PtrLAC3	chs-CMA1a	TTACTTAA	343	363	388	8	+	Daucus carota	light responsiveness
Potri.001G206200.1.v3.0	PtrLAC3	GATA-motif	GATAGGA	1049	1069	1094	7	+	Arabidopsis thaliana	light responsiveness
Potri.001G206200.1.v3.0	PtrLAC3	TGACG-motif	TGACG	1653	1673	1698	5	+	Hordeum vulgare	MeJA-responsiveness
Potri.001G206200.1.v3.0	PtrLAC3	TGACG-motif	TGACG	1905	1925	1950	5	+	Hordeum vulgare	MeJA-responsiveness
Potri.001G206200.1.v3.0	PtrLAC3	P-box	CCTTTTG	168	188	213	7	-	Oryza sativa	gibberellin-responsiveness
Potri.001G206200.1.v3.0	PtrLAC3	P-box	CCTTTTG	1674	1694	1719	7	-	Oryza sativa	gibberellin-responsiveness
Potri.001G206200.1.v3.0	PtrLAC3	P-box	CCTTTTG	1864	1884	1909	7	-	Oryza sativa	gibberellin-responsiveness
Potri.001G206200.1.v3.0	PtrLAC3	GARE-motif	TCTGTTG	947	967	992	7	+	Brassica oleracea	gibberellin-responsiveness
Potri.001G206200.1.v3.0	PtrLAC3	GT1-motif	GGTTAA	52	72	97	6	+	Arabidopsis thaliana	light responsiveness
Potri.001G206200.1.v3.0	PtrLAC3	GT1-motif	GGTTAAT	441	461	486	7	-	Avena sativa	light responsiveness
Potri.001G206200.1.v3.0	PtrLAC3	GT1-motif	GGTTAA	442	462	487	6	-	Arabidopsis thaliana	light responsiveness
Potri.001G206200.1.v3.0	PtrLAC3	TCT-motif	TCTTAC	137	157	182	6	-	Arabidopsis thaliana	light responsiveness
Potri.001G206200.1.v3.0	PtrLAC3	TCT-motif	TCTTAC	814	834	859	6	+	Arabidopsis thaliana	light responsiveness
Potri.001G206200.1.v3.0	PtrLAC3	AE-box	AGAAACAA	581	601	626	8	+	Arabidopsis thaliana	light responsiveness
Potri.001G206200.1.v3.0	PtrLAC3	TGA-element	AACGAC	802	822	847	6	+	Brassica oleracea	auxin responsiveness
Potri.001G206200.1.v3.0	PtrLAC3	Box 4	ATTAAT	120	140	165	6	+	Petroselinum crispum	light responsiveness
Potri.001G206200.1.v3.0	PtrLAC3	Box 4	ATTAAT	1790	1810	1835	6	-	Petroselinum crispum	light responsiveness
Potri.001G248700.1.v3.0	PtrLAC4	LTR	CCGAAA	1507	1527	1552	6	-	Hordeum vulgare	low-temperature responsiveness
Potri.001G248700.1.v3.0	PtrLAC4	CGTCA-motif	CGTCA	974	994	1019	5	+	Hordeum vulgare	MeJA-responsiveness
Potri.001G248700.1.v3.0	PtrLAC4	CGTCA-motif	CGTCA	1102	1122	1147	5	-	Hordeum vulgare	MeJA-responsiveness
Potri.001G248700.1.v3.0	PtrLAC4	TC-rich repeats	GTTTTCTTAC	291	311	336	9	+	Nicotiana tabacum	defense and stress responsiveness
Potri.001G248700.1.v3.0	PtrLAC4	TGACG-motif	TGACG	974	994	1019	5	-	Hordeum vulgare	MeJA-responsiveness
Potri.001G248700.1.v3.0	PtrLAC4	TGACG-motif	TGACG	1102	1122	1147	5	+	Hordeum vulgare	MeJA-responsiveness
Potri.001G248700.1.v3.0	PtrLAC4	GARE-motif	TCTGTTG	1179	1199	1224	7	+	Brassica oleracea	gibberellin-responsiveness
Potri.001G248700.1.v3.0	PtrLAC4	GT1-motif	GGTTAA	1266	1286	1311	6	+	Arabidopsis thaliana	light responsiveness
Potri.001G248700.1.v3.0	PtrLAC4	TCCC-motif	TCTCCCT	1960	1980	2005	7	-	Spinacia oleracea	light responsiveness
Potri.001G248700.1.v3.0	PtrLAC4	MRE	AACCTAA	533	553	578	7	-	Petroselinum crispum	MYB binding site involved in light responsiveness
Potri.001G248700.1.v3.0	PtrLAC4	MRE	AACCTAA	791	811	836	7	-	Petroselinum crispum	MYB binding site involved in light responsiveness
Potri.001G248700.1.v3.0	PtrLAC4	AE-box	AGAAACAA	1782	1802	1827	8	-	Arabidopsis thaliana	light responsiveness
Potri.001G248700.1.v3.0	PtrLAC4	TGA-element	AACGAC	1838	1858	1883	6	+	Brassica oleracea	auxin responsiveness
Potri.001G248700.1.v3.0	PtrLAC4	Box 4	ATTAAT	-13	7	32	6	+	Petroselinum crispum	light responsiveness
Potri.001G248700.1.v3.0	PtrLAC4	Box 4	ATTAAT	125	145	170	6	+	Petroselinum crispum	light responsiveness
Potri.001G248700.1.v3.0	PtrLAC4	Box 4	ATTAAT	597	617	642	6	+	Petroselinum crispum	light responsiveness
Potri.001G248700.1.v3.0	PtrLAC4	Box 4	ATTAAT	835	855	880	6	+	Petroselinum crispum	light responsiveness
Potri.001G248700.1.v3.0	PtrLAC4	Box 4	ATTAAT	839	859	884	6	+	Petroselinum crispum	light responsiveness
Potri.001G248700.1.v3.0	PtrLAC4	Box 4	ATTAAT	1437	1457	1482	6	-	Petroselinum crispum	light responsiveness
Potri.001G248700.1.v3.0	PtrLAC4	Box 4	ATTAAT	1480	1500	1525	6	-	Petroselinum crispum	light responsiveness
Potri.001G248700.1.v3.0	PtrLAC4	Box 4	ATTAAT	1928	1948	1973	6	-	Petroselinum crispum	light responsiveness
Potri.001G341600.1.v3.0	PtrLAC5	L-box	ATCCCACCTAC	640	660	685	10	-	Petroselinum crispum	light responsiveness
Potri.001G341600.1.v3.0	PtrLAC5	G-box	TACGTG	1120	1140	1165	6	-	Arabidopsis thaliana	light responsiveness
Potri.001G341600.1.v3.0	PtrLAC5	TCT-motif	TCTTAC	1198	1218	1243	6	+	Arabidopsis thaliana	light responsiveness
Potri.001G341600.1.v3.0	PtrLAC5	GT1-motif	GGTTAA	552	572	597	6	+	Arabidopsis thaliana	light responsiveness
Potri.001G341600.1.v3.0	PtrLAC5	GT1-motif	GGTTAA	1206	1226	1251	6	+	Arabidopsis thaliana	light responsiveness
Potri.001G341600.1.v3.0	PtrLAC5	GT1-motif	GGTTAA	1954	1974	1999	6	-	Arabidopsis thaliana	light responsiveness
Potri.001G341600.1.v3.0	PtrLAC5	Sp1	GGGCGG	1023	1043	1068	6	-	Oryza sativa	light responsiveness
Potri.001G341600.1.v3.0	PtrLAC5	Box 4	ATTAAT	318	338	363	6	+	Petroselinum crispum	light responsiveness
Potri.001G341600.1.v3.0	PtrLAC5	Box 4	ATTAAT	1441	1461	1486	6	-	Petroselinum crispum	light responsiveness
Potri.001G341600.1.v3.0	PtrLAC5	Box 4	ATTAAT	1767	1787	1812	6	-	Petroselinum crispum	light responsiveness
Potri.001G341600.1.v3.0	PtrLAC5	ABRE	ACGTG	1120	1140	1165	5	-	Arabidopsis thaliana	abscisic acid responsiveness
Potri.001G341600.1.v3.0	PtrLAC5	TGA-element	AACGAC	680	700	725	6	-	Brassica oleracea	auxin responsiveness
Potri.001G341600.1.v3.0	PtrLAC5	Gap-box	CAAATGAA(A/G)A	1625	1645	1670	9.5	-	Arabidopsis thaliana	light responsiveness
Potri.001G341600.1.v3.0	PtrLAC5	CGTCA-motif	CGTCA	1008	1028	1053	5	+	Hordeum vulgare	MeJA-responsiveness
Potri.001G341600.1.v3.0	PtrLAC5	LTR	CCGAAA	415	435	460	6	+	Hordeum vulgare	low-temperature responsiveness
Potri.001G341600.1.v3.0	PtrLAC5	LTR	CCGAAA	466	486	511	6	+	Hordeum vulgare	low-temperature responsiveness
Potri.001G341600.1.v3.0	PtrLAC5	LTR	CCGAAA	525	545	570	6	+	Hordeum vulgare	low-temperature responsiveness
Potri.001G341600.1.v3.0	PtrLAC5	TC-rich repeats	GTTTTCTTAC	1194	1214	1239	9	+	Nicotiana tabacum	defense and stress responsiveness
Potri.001G341600.1.v3.0	PtrLAC5	chs-CMA2a	TCACTTGA	832	852	877	8	-	Petroselinum crispum	light responsiveness
Potri.001G341600.1.v3.0	PtrLAC5	MBS	CAACTG	156	176	201	6	+	Arabidopsis thaliana	drought-inducibility
Potri.001G341600.1.v3.0	PtrLAC5	TGACG-motif	TGACG	1008	1028	1053	5	-	Hordeum vulgare	MeJA-responsiveness
Potri.001G401100.1.v3.0	PtrLAC6	I-box	gGATAAGGTG	1173	1193	1218	9	-	Zea mays	light responsiveness
Potri.001G401100.1.v3.0	PtrLAC6	chs-CMA2a	TCACTTGA	1129	1149	1174	8	-	Petroselinum crispum	light responsiveness
Potri.001G401100.1.v3.0	PtrLAC6	GATA-motif	GATAGGA	786	806	831	7	-	Arabidopsis thaliana	light responsiveness
Potri.001G401100.1.v3.0	PtrLAC6	GATA-motif	AAGGATAAGG	1175	1195	1220	9	-	Solanum tuberosum	light responsiveness
Potri.001G401100.1.v3.0	PtrLAC6	MBS	CAACTG	223	243	268	6	-	Arabidopsis thaliana	drought-inducibility
Potri.001G401100.1.v3.0	PtrLAC6	LTR	CCGAAA	105	125	150	6	+	Hordeum vulgare	low-temperature responsiveness
Potri.001G401100.1.v3.0	PtrLAC6	TC-rich repeats	ATTCTCTAAC	1325	1345	1370	10	+	Nicotiana tabacum	defense and stress responsiveness
Potri.001G401100.1.v3.0	PtrLAC6	Box 4	ATTAAT	498	518	543	6	+	Petroselinum crispum	light responsiveness
Potri.001G401100.1.v3.0	PtrLAC6	Box 4	ATTAAT	504	524	549	6	+	Petroselinum crispum	light responsiveness
Potri.001G401100.1.v3.0	PtrLAC6	Box 4	ATTAAT	1267	1287	1312	6	-	Petroselinum crispum	light responsiveness
Potri.001G401100.1.v3.0	PtrLAC6	Box 4	ATTAAT	1610	1630	1655	6	-	Petroselinum crispum	light responsiveness
Potri.001G401100.1.v3.0	PtrLAC6	GT1-motif	GGTTAA	1584	1604	1629	6	-	Arabidopsis thaliana	light responsiveness
Potri.001G401100.1.v3.0	PtrLAC6	MRE	AACCTAA	658	678	703	7	-	Petroselinum crispum	MYB binding site involved in light responsiveness
Potri.001G401100.1.v3.0	PtrLAC6	AE-box	AGAAACAA	928	948	973	8	+	Arabidopsis thaliana	light responsiveness
Potri.001G401300.1.v3.0	PtrLAC7	Sp1	GGGCGG	804	824	849	6	-	Oryza sativa	light responsiveness
Potri.001G401300.1.v3.0	PtrLAC7	GT1-motif	GGTTAAT	208	228	253	7	+	Avena sativa	light responsiveness
Potri.001G401300.1.v3.0	PtrLAC7	GT1-motif	GGTTAA	1186	1206	1231	6	+	Arabidopsis thaliana	light responsiveness
Potri.001G401300.1.v3.0	PtrLAC7	TCT-motif	TCTTAC	182	202	227	6	+	Arabidopsis thaliana	light responsiveness
Potri.001G401300.1.v3.0	PtrLAC7	TCT-motif	TCTTAC	1174	1194	1219	6	+	Arabidopsis thaliana	light responsiveness
Potri.001G401300.1.v3.0	PtrLAC7	TCT-motif	TCTTAC	1661	1681	1706	6	-	Arabidopsis thaliana	light responsiveness
Potri.001G401300.1.v3.0	PtrLAC7	TCCC-motif	TCTCCCT	1057	1077	1102	7	+	Spinacia oleracea	light responsiveness
Potri.001G401300.1.v3.0	PtrLAC7	G-box	CACGAC	857	877	902	6	+	Zea mays	light responsiveness
Potri.001G401300.1.v3.0	PtrLAC7	G-box	TACGTG	1181	1201	1226	6	+	Arabidopsis thaliana	light responsiveness
Potri.001G401300.1.v3.0	PtrLAC7	ACE	GCGACGTACC	1514	1534	1559	9	-	Petroselinum crispum	light responsiveness
Potri.001G401300.1.v3.0	PtrLAC7	TGA-element	AACGAC	90	110	135	6	+	Brassica oleracea	auxin responsiveness
Potri.001G401300.1.v3.0	PtrLAC7	TGA-element	AACGAC	273	293	318	6	-	Brassica oleracea	auxin responsiveness
Potri.001G401300.1.v3.0	PtrLAC7	ABRE	ACGTG	32	52	77	5	+	Arabidopsis thaliana	abscisic acid responsiveness
Potri.001G401300.1.v3.0	PtrLAC7	ABRE	ACGTG	1182	1202	1227	5	+	Arabidopsis thaliana	abscisic acid responsiveness
Potri.001G401300.1.v3.0	PtrLAC7	Box 4	ATTAAT	-4	16	41	6	+	Petroselinum crispum	light responsiveness
Potri.001G401300.1.v3.0	PtrLAC7	Box 4	ATTAAT	435	455	480	6	+	Petroselinum crispum	light responsiveness
Potri.001G401300.1.v3.0	PtrLAC7	Box 4	ATTAAT	1244	1264	1289	6	-	Petroselinum crispum	light responsiveness
Potri.001G401300.1.v3.0	PtrLAC7	Box II	TGGTAATAA	1784	1804	1829	9	+	Solanum tuberosum	light responsiveness
Potri.001G401300.1.v3.0	PtrLAC7	TATC-box	TATCCCA	1695	1715	1740	7	-	Oryza sativa	gibberellin-responsiveness
Potri.001G401300.1.v3.0	PtrLAC7	TC-rich repeats	GTTTTCTTAC	1170	1190	1215	9	+	Nicotiana tabacum	defense and stress responsiveness
Potri.001G401300.1.v3.0	PtrLAC7	TC-rich repeats	GTTTTCTTAC	1661	1681	1706	9	-	Nicotiana tabacum	defense and stress responsiveness
Potri.001G401300.1.v3.0	PtrLAC7	MBS	CAACTG	1447	1467	1492	6	+	Arabidopsis thaliana	drought-inducibility
Potri.001G401300.1.v3.0	PtrLAC7	GARE-motif	TCTGTTG	1536	1556	1581	7	-	Brassica oleracea	gibberellin-responsiveness
Potri.001G401300.1.v3.0	PtrLAC7	G-Box	CACGTT	31	51	76	6	-	Pisum sativum	light responsiveness
Potri.001G401300.1.v3.0	PtrLAC7	P-box	CCTTTTG	1737	1757	1782	7	-	Oryza sativa	gibberellin-responsiveness
Potri.004G156400.1.v3.0	PtrLAC8	CGTCA-motif	CGTCA	1047	1067	1092	5	-	Hordeum vulgare	MeJA-responsiveness
Potri.004G156400.1.v3.0	PtrLAC8	LTR	CCGAAA	1182	1202	1227	6	+	Hordeum vulgare	low-temperature responsiveness
Potri.004G156400.1.v3.0	PtrLAC8	LTR	CCGAAA	1310	1330	1355	6	-	Hordeum vulgare	low-temperature responsiveness
Potri.004G156400.1.v3.0	PtrLAC8	TC-rich repeats	GTTTTCTTAC	862	882	907	9	+	Nicotiana tabacum	defense and stress responsiveness
Potri.004G156400.1.v3.0	PtrLAC8	GATA-motif	AAGATAAGATT	377	397	422	10	+	Arabidopsis thaliana	light responsiveness
Potri.004G156400.1.v3.0	PtrLAC8	GATA-motif	GATAGGG	1795	1815	1840	7	-	Pisum sativum	light responsiveness
Potri.004G156400.1.v3.0	PtrLAC8	TGACG-motif	TGACG	1047	1067	1092	5	+	Hordeum vulgare	MeJA-responsiveness
Potri.004G156400.1.v3.0	PtrLAC8	TCCC-motif	TCTCCCT	754	774	799	7	-	Spinacia oleracea	light responsiveness
Potri.004G156400.1.v3.0	PtrLAC8	G-box	CACGTC	546	566	591	6	+	Zea mays	light responsiveness
Potri.004G156400.1.v3.0	PtrLAC8	Box 4	ATTAAT	64	84	109	6	+	Petroselinum crispum	light responsiveness
Potri.004G156400.1.v3.0	PtrLAC8	ABRE	ACGTG	546	566	591	5	-	Arabidopsis thaliana	abscisic acid responsiveness
Potri.005G200500.1.v3.0	PtrLAC50	CGTCA-motif	CGTCA	642	662	687	5	-	Hordeum vulgare	MeJA-responsiveness
Potri.005G200500.1.v3.0	PtrLAC50	TGACG-motif	TGACG	642	662	687	5	+	Hordeum vulgare	MeJA-responsiveness
Potri.005G200500.1.v3.0	PtrLAC50	GARE-motif	TCTGTTG	402	422	447	7	+	Brassica oleracea	gibberellin-responsiveness
Potri.005G200500.1.v3.0	PtrLAC50	I-box	AGATAAGG	1508	1528	1553	8	-	Triticum aestivum	light responsiveness
Potri.005G200500.1.v3.0	PtrLAC50	AuxRR-core	GGTCCAT	359	379	404	7	+	Nicotiana tabacum	auxin responsiveness
Potri.005G200500.1.v3.0	PtrLAC50	GT1-motif	GGTTAA	623	643	668	6	-	Arabidopsis thaliana	light responsiveness
Potri.005G200500.1.v3.0	PtrLAC50	TCT-motif	TCTTAC	752	772	797	6	+	Arabidopsis thaliana	light responsiveness
Potri.005G200500.1.v3.0	PtrLAC50	G-box	CACGAC	413	433	458	6	+	Zea mays	light responsiveness
Potri.005G200500.1.v3.0	PtrLAC50	G-box	TACGTG	1622	1642	1667	6	-	Arabidopsis thaliana	light responsiveness
Potri.005G200500.1.v3.0	PtrLAC50	ABRE	ACGTG	1622	1642	1667	5	-	Arabidopsis thaliana	abscisic acid responsiveness
Potri.005G200500.1.v3.0	PtrLAC50	Box 4	ATTAAT	81	101	126	6	+	Petroselinum crispum	light responsiveness
Potri.005G200500.1.v3.0	PtrLAC50	Box 4	ATTAAT	202	222	247	6	+	Petroselinum crispum	light responsiveness
Potri.005G200500.1.v3.0	PtrLAC50	Box 4	ATTAAT	491	511	536	6	+	Petroselinum crispum	light responsiveness
Potri.005G200500.1.v3.0	PtrLAC50	Box 4	ATTAAT	511	531	556	6	+	Petroselinum crispum	light responsiveness
Potri.005G200500.1.v3.0	PtrLAC50	Box 4	ATTAAT	724	744	769	6	+	Petroselinum crispum	light responsiveness
Potri.005G200500.1.v3.0	PtrLAC50	Box 4	ATTAAT	1138	1158	1183	6	-	Petroselinum crispum	light responsiveness
Potri.005G200600.1.v3.0	PtrLAC9	AE-box	AGAAACTT	995	1015	1040	8	-	Arabidopsis thaliana	light responsiveness
Potri.005G200600.1.v3.0	PtrLAC9	MRE	AACCTAA	873	893	918	7	-	Petroselinum crispum	MYB binding site involved in light responsiveness
Potri.005G200600.1.v3.0	PtrLAC9	MRE	AACCTAA	986	1006	1031	7	-	Petroselinum crispum	MYB binding site involved in light responsiveness
Potri.005G200600.1.v3.0	PtrLAC9	MRE	AACCTAA	1286	1306	1331	7	-	Petroselinum crispum	MYB binding site involved in light responsiveness
Potri.005G200600.1.v3.0	PtrLAC9	AT1-motif	AATTATTTTTTATT	940	960	985	13	+	Solanum tuberosum	light responsiveness
Potri.005G200600.1.v3.0	PtrLAC9	GT1-motif	GGTTAA	277	297	322	6	+	Arabidopsis thaliana	light responsiveness
Potri.005G200600.1.v3.0	PtrLAC9	chs-Unit 1 m1	ACCTAACCCGC	72	92	117	10	-	Hordeum vulgare	light responsiveness
Potri.005G200600.1.v3.0	PtrLAC9	G-box	TACGTG	131	151	176	6	+	Arabidopsis thaliana	light responsiveness
Potri.005G200600.1.v3.0	PtrLAC9	Box 4	ATTAAT	771	791	816	6	+	Petroselinum crispum	light responsiveness
Potri.005G200600.1.v3.0	PtrLAC9	Box 4	ATTAAT	807	827	852	6	+	Petroselinum crispum	light responsiveness
Potri.005G200600.1.v3.0	PtrLAC9	Box 4	ATTAAT	1515	1535	1560	6	-	Petroselinum crispum	light responsiveness
Potri.005G200600.1.v3.0	PtrLAC9	ABRE	TACGTGTC	131	151	176	8	+	Oryza sativa	abscisic acid responsiveness
Potri.005G200600.1.v3.0	PtrLAC9	ABRE	ACGTG	132	152	177	5	+	Arabidopsis thaliana	abscisic acid responsiveness
Potri.005G200600.1.v3.0	PtrLAC9	ABRE	ACGTG	680	700	725	5	+	Arabidopsis thaliana	abscisic acid responsiveness
Potri.005G200600.1.v3.0	PtrLAC9	LTR	CCGAAA	779	799	824	6	+	Hordeum vulgare	low-temperature responsiveness
Potri.005G200600.1.v3.0	PtrLAC9	MBS	CAACTG	404	424	449	6	+	Arabidopsis thaliana	drought-inducibility
Potri.005G200600.1.v3.0	PtrLAC9	G-Box	CACGTT	679	699	724	6	-	Pisum sativum	light responsiveness
Potri.005G200700.1.v3.0	PtrLAC10	chs-CMA1a	TTACTTAA	73	93	118	8	-	Daucus carota	light responsiveness
Potri.005G200700.1.v3.0	PtrLAC10	Gap-box	CAAATGAA(A/G)A	1159	1179	1204	9.5	+	Arabidopsis thaliana	light responsiveness
Potri.005G200700.1.v3.0	PtrLAC10	Box 4	ATTAAT	159	179	204	6	+	Petroselinum crispum	light responsiveness
Potri.005G200700.1.v3.0	PtrLAC10	Box 4	ATTAAT	390	410	435	6	+	Petroselinum crispum	light responsiveness
Potri.005G200700.1.v3.0	PtrLAC10	Box 4	ATTAAT	1263	1283	1308	6	-	Petroselinum crispum	light responsiveness
Potri.005G200700.1.v3.0	PtrLAC10	Box 4	ATTAAT	1507	1527	1552	6	-	Petroselinum crispum	light responsiveness
Potri.005G200700.1.v3.0	PtrLAC10	Box 4	ATTAAT	1662	1682	1707	6	-	Petroselinum crispum	light responsiveness
Potri.005G200700.1.v3.0	PtrLAC10	Box 4	ATTAAT	1849	1869	1894	6	-	Petroselinum crispum	light responsiveness
Potri.005G200700.1.v3.0	PtrLAC10	Box 4	ATTAAT	1853	1873	1898	6	-	Petroselinum crispum	light responsiveness
Potri.005G200700.1.v3.0	PtrLAC10	Box 4	ATTAAT	1857	1877	1902	6	-	Petroselinum crispum	light responsiveness
Potri.005G200700.1.v3.0	PtrLAC10	GT1-motif	GGTTAA	286	306	331	6	-	Arabidopsis thaliana	light responsiveness
Potri.005G200700.1.v3.0	PtrLAC10	TCT-motif	TCTTAC	418	438	463	6	+	Arabidopsis thaliana	light responsiveness
Potri.005G200700.1.v3.0	PtrLAC10	TCT-motif	TCTTAC	1675	1695	1720	6	-	Arabidopsis thaliana	light responsiveness
Potri.006G087100.1.v3.0	PtrLAC11	Box 4	ATTAAT	801	821	846	6	+	Petroselinum crispum	light responsiveness
Potri.006G087100.1.v3.0	PtrLAC11	Box 4	ATTAAT	1248	1268	1293	6	-	Petroselinum crispum	light responsiveness
Potri.006G087100.1.v3.0	PtrLAC11	Box 4	ATTAAT	1372	1392	1417	6	-	Petroselinum crispum	light responsiveness
Potri.006G087100.1.v3.0	PtrLAC11	Box 4	ATTAAT	1817	1837	1862	6	-	Petroselinum crispum	light responsiveness
Potri.006G087100.1.v3.0	PtrLAC11	ABRE	ACGTG	352	372	397	5	+	Arabidopsis thaliana	abscisic acid responsiveness
Potri.006G087100.1.v3.0	PtrLAC11	ABRE	CGTACGTGCA	570	590	615	9	+	Hordeum vulgare	abscisic acid responsiveness
Potri.006G087100.1.v3.0	PtrLAC11	ABRE	TACGTGTC	1863	1883	1908	8	+	Oryza sativa	abscisic acid responsiveness
Potri.006G087100.1.v3.0	PtrLAC11	ABRE	ACGTG	1864	1884	1909	5	+	Arabidopsis thaliana	abscisic acid responsiveness
Potri.006G087100.1.v3.0	PtrLAC11	G-box	CACGTC	351	371	396	6	-	Zea mays	light responsiveness
Potri.006G087100.1.v3.0	PtrLAC11	G-box	TACGTG	1863	1883	1908	6	+	Arabidopsis thaliana	light responsiveness
Potri.006G087100.1.v3.0	PtrLAC11	ACE	GACACGTATG	1861	1881	1906	9	-	Petroselinum crispum	light responsiveness
Potri.006G087100.1.v3.0	PtrLAC11	MRE	AACCTAA	357	377	402	7	+	Petroselinum crispum	MYB binding site involved in light responsiveness
Potri.006G087100.1.v3.0	PtrLAC11	MRE	AACCTAA	885	905	930	7	+	Petroselinum crispum	MYB binding site involved in light responsiveness
Potri.006G087100.1.v3.0	PtrLAC11	TCT-motif	TCTTAC	1712	1732	1757	6	+	Arabidopsis thaliana	light responsiveness
Potri.006G087100.1.v3.0	PtrLAC11	TCT-motif	TCTTAC	1822	1842	1867	6	+	Arabidopsis thaliana	light responsiveness
Potri.006G087100.1.v3.0	PtrLAC11	GT1-motif	GGTTAA	883	903	928	6	-	Arabidopsis thaliana	light responsiveness
Potri.006G087100.1.v3.0	PtrLAC11	P-box	CCTTTTG	703	723	748	7	-	Oryza sativa	gibberellin-responsiveness
Potri.006G087100.1.v3.0	PtrLAC11	MBS	CAACTG	150	170	195	6	-	Arabidopsis thaliana	drought-inducibility
Potri.006G087100.1.v3.0	PtrLAC11	TGACG-motif	TGACG	1805	1825	1850	5	+	Hordeum vulgare	MeJA-responsiveness
Potri.006G087100.1.v3.0	PtrLAC11	chs-CMA2a	TCACTTGA	534	554	579	8	-	Petroselinum crispum	light responsiveness
Potri.006G087100.1.v3.0	PtrLAC11	TC-rich repeats	GTTTTCTTAC	718	738	763	9	-	Nicotiana tabacum	defense and stress responsiveness
Potri.006G087100.1.v3.0	PtrLAC11	CGTCA-motif	CGTCA	1805	1825	1850	5	-	Hordeum vulgare	MeJA-responsiveness
Potri.006G087500.1.v3.0	PtrLAC12	AT1-motif	AATTATTTTTTATT	83	103	128	13	-	Solanum tuberosum	light responsiveness
Potri.006G087500.1.v3.0	PtrLAC12	TCT-motif	TCTTAC	1603	1623	1648	6	+	Arabidopsis thaliana	light responsiveness
Potri.006G087500.1.v3.0	PtrLAC12	TCCC-motif	TCTCCCT	1919	1939	1964	7	+	Spinacia oleracea	light responsiveness
Potri.006G087500.1.v3.0	PtrLAC12	G-box	TACGTG	518	538	563	6	+	Arabidopsis thaliana	light responsiveness
Potri.006G087500.1.v3.0	PtrLAC12	G-box	CACGTC	1589	1609	1634	6	+	Zea mays	light responsiveness
Potri.006G087500.1.v3.0	PtrLAC12	ABRE	ACGTG	519	539	564	5	+	Arabidopsis thaliana	abscisic acid responsiveness
Potri.006G087500.1.v3.0	PtrLAC12	ABRE	ACGTG	1589	1609	1634	5	-	Arabidopsis thaliana	abscisic acid responsiveness
Potri.006G087500.1.v3.0	PtrLAC12	Box 4	ATTAAT	98	118	143	6	+	Petroselinum crispum	light responsiveness
Potri.006G087500.1.v3.0	PtrLAC12	Box 4	ATTAAT	425	445	470	6	+	Petroselinum crispum	light responsiveness
Potri.006G087500.1.v3.0	PtrLAC12	Box 4	ATTAAT	445	465	490	6	+	Petroselinum crispum	light responsiveness
Potri.006G087500.1.v3.0	PtrLAC12	Box 4	ATTAAT	468	488	513	6	+	Petroselinum crispum	light responsiveness
Potri.006G087500.1.v3.0	PtrLAC12	Box 4	ATTAAT	657	677	702	6	+	Petroselinum crispum	light responsiveness
Potri.006G087500.1.v3.0	PtrLAC12	Box 4	ATTAAT	1074	1094	1119	6	-	Petroselinum crispum	light responsiveness
Potri.006G087500.1.v3.0	PtrLAC12	Box 4	ATTAAT	1138	1158	1183	6	-	Petroselinum crispum	light responsiveness
Potri.006G087500.1.v3.0	PtrLAC12	TATC-box	TATCCCA	148	168	193	7	+	Oryza sativa	gibberellin-responsiveness
Potri.006G087500.1.v3.0	PtrLAC12	TATC-box	TATCCCA	208	228	253	7	+	Oryza sativa	gibberellin-responsiveness
Potri.006G087500.1.v3.0	PtrLAC12	TC-rich repeats	ATTCTCTAAC	1682	1702	1727	9	-	Nicotiana tabacum	defense and stress responsiveness
Potri.006G087500.1.v3.0	PtrLAC12	CGTCA-motif	CGTCA	1563	1583	1608	5	-	Hordeum vulgare	MeJA-responsiveness
Potri.006G087500.1.v3.0	PtrLAC12	TGACG-motif	TGACG	1563	1583	1608	5	+	Hordeum vulgare	MeJA-responsiveness
Potri.006G087500.1.v3.0	PtrLAC12	MBS	CAACTG	1425	1445	1470	6	-	Arabidopsis thaliana	drought-inducibility
Potri.006G087500.1.v3.0	PtrLAC12	GATA-motif	AAGATAAGATT	1517	1537	1562	10	+	Arabidopsis thaliana	light responsiveness
Potri.006G094100.1.v3.0	PtrLAC13	CGTCA-motif	CGTCA	111	131	156	5	+	Hordeum vulgare	MeJA-responsiveness
Potri.006G094100.1.v3.0	PtrLAC13	LTR	CCGAAA	1636	1656	1681	6	+	Hordeum vulgare	low-temperature responsiveness
Potri.006G094100.1.v3.0	PtrLAC13	MBS	CAACTG	0	20	45	6	-	Arabidopsis thaliana	drought-inducibility
Potri.006G094100.1.v3.0	PtrLAC13	TGACG-motif	TGACG	111	131	156	5	-	Hordeum vulgare	MeJA-responsiveness
Potri.006G094100.1.v3.0	PtrLAC13	chs-CMA2a	TCACTTGA	1775	1795	1820	8	+	Petroselinum crispum	light responsiveness
Potri.006G094100.1.v3.0	PtrLAC13	MRE	AACCTAA	455	475	500	7	+	Petroselinum crispum	MYB binding site involved in light responsiveness
Potri.006G094100.1.v3.0	PtrLAC13	TCT-motif	TCTTAC	539	559	584	6	-	Arabidopsis thaliana	light responsiveness
Potri.006G094100.1.v3.0	PtrLAC13	TCCC-motif	TCTCCCT	1126	1146	1171	7	+	Spinacia oleracea	light responsiveness
Potri.006G094100.1.v3.0	PtrLAC13	Box 4	ATTAAT	153	173	198	6	+	Petroselinum crispum	light responsiveness
Potri.006G094100.1.v3.0	PtrLAC13	Box 4	ATTAAT	681	701	726	6	+	Petroselinum crispum	light responsiveness
Potri.006G094100.1.v3.0	PtrLAC13	Box 4	ATTAAT	793	813	838	6	+	Petroselinum crispum	light responsiveness
Potri.006G094100.1.v3.0	PtrLAC13	ABRE	AACCCGG	1487	1507	1532	7	-	Arabidopsis thaliana	abscisic acid responsiveness
Potri.006G096900.1.v3.0	PtrLAC14	chs-CMA1a	TTACTTAA	196	216	241	8	-	Daucus carota	light responsiveness
Potri.006G096900.1.v3.0	PtrLAC14	chs-CMA1a	TTACTTAA	1304	1324	1349	8	+	Daucus carota	light responsiveness
Potri.006G096900.1.v3.0	PtrLAC14	TC-rich repeats	ATTCTCTAAC	725	745	770	9	+	Nicotiana tabacum	defense and stress responsiveness
Potri.006G096900.1.v3.0	PtrLAC14	TC-rich repeats	GTTTTCTTAC	1722	1742	1767	9	+	Nicotiana tabacum	defense and stress responsiveness
Potri.006G096900.1.v3.0	PtrLAC14	TC-rich repeats	GTTTTCTTAC	1766	1786	1811	9	-	Nicotiana tabacum	defense and stress responsiveness
Potri.006G096900.1.v3.0	PtrLAC14	GATA-motif	AAGATAAGATT	496	516	541	10	+	Arabidopsis thaliana	light responsiveness
Potri.006G096900.1.v3.0	PtrLAC14	GATA-motif	AAGATAAGATT	708	728	753	10	+	Arabidopsis thaliana	light responsiveness
Potri.006G096900.1.v3.0	PtrLAC14	G-box	CACGTC	1737	1757	1782	6	+	Zea mays	light responsiveness
Potri.006G096900.1.v3.0	PtrLAC14	AE-box	AGAAACAA	222	242	267	8	-	Arabidopsis thaliana	light responsiveness
Potri.006G096900.1.v3.0	PtrLAC14	AE-box	AGAAACTT	256	276	301	8	+	Arabidopsis thaliana	light responsiveness
Potri.006G096900.1.v3.0	PtrLAC14	MRE	AACCTAA	423	443	468	7	+	Petroselinum crispum	MYB binding site involved in light responsiveness
Potri.006G096900.1.v3.0	PtrLAC14	AT1-motif	AATTATTTTTTATT	213	233	258	13	+	Solanum tuberosum	light responsiveness
Potri.006G096900.1.v3.0	PtrLAC14	TCT-motif	TCTTAC	31	51	76	6	-	Arabidopsis thaliana	light responsiveness
Potri.006G096900.1.v3.0	PtrLAC14	TCT-motif	TCTTAC	1766	1786	1811	6	-	Arabidopsis thaliana	light responsiveness
Potri.006G096900.1.v3.0	PtrLAC14	TCT-motif	TCTTAC	1927	1947	1972	6	-	Arabidopsis thaliana	light responsiveness
Potri.006G096900.1.v3.0	PtrLAC14	GT1-motif	GGTTAA	461	481	506	6	-	Arabidopsis thaliana	light responsiveness
Potri.006G096900.1.v3.0	PtrLAC14	chs-CMA2b	GAACCTACACAC	1810	1830	1855	11	+	Hordeum vulgare	light responsiveness
Potri.006G096900.1.v3.0	PtrLAC14	Box 4	ATTAAT	50	70	95	6	+	Petroselinum crispum	light responsiveness
Potri.006G096900.1.v3.0	PtrLAC14	Box 4	ATTAAT	1632	1652	1677	6	-	Petroselinum crispum	light responsiveness
Potri.006G096900.1.v3.0	PtrLAC14	ABRE	ACGTG	1737	1757	1782	5	-	Arabidopsis thaliana	abscisic acid responsiveness
Potri.006G096900.1.v3.0	PtrLAC14	TGA-element	AACGAC	1192	1212	1237	6	+	Brassica oleracea	auxin responsiveness
Potri.006G096900.1.v3.0	PtrLAC14	TGA-element	AACGAC	1840	1860	1885	6	+	Brassica oleracea	auxin responsiveness
Potri.006G097000.1.v3.0	PtrLAC15	TC-rich repeats	GTTTTCTTAC	1765	1785	1810	9	-	Nicotiana tabacum	defense and stress responsiveness
Potri.006G097000.1.v3.0	PtrLAC15	LTR	CCGAAA	473	493	518	6	-	Hordeum vulgare	low-temperature responsiveness
Potri.006G097000.1.v3.0	PtrLAC15	GATA-motif	AAGATAAGATT	786	806	831	10	+	Arabidopsis thaliana	light responsiveness
Potri.006G097000.1.v3.0	PtrLAC15	G-Box	CACGTT	620	640	665	6	+	Pisum sativum	light responsiveness
Potri.006G097000.1.v3.0	PtrLAC15	G-Box	CACGTG	864	884	909	6	+	Pisum sativum	light responsiveness
Potri.006G097000.1.v3.0	PtrLAC15	GARE-motif	TCTGTTG	1939	1959	1984	7	-	Brassica oleracea	gibberellin-responsiveness
Potri.006G097000.1.v3.0	PtrLAC15	I-box	AAGATAAGGCT	1779	1799	1824	10	+	Gossypium hirsutum	light responsiveness
Potri.006G097000.1.v3.0	PtrLAC15	LAMP-element	CTTTATCA	843	863	888	8	-	Pisum sativum	light responsiveness
Potri.006G097000.1.v3.0	PtrLAC15	P-box	CCTTTTG	-6	14	39	7	+	Oryza sativa	gibberellin-responsiveness
Potri.006G097000.1.v3.0	PtrLAC15	MRE	AACCTAA	624	644	669	7	-	Petroselinum crispum	MYB binding site involved in light responsiveness
Potri.006G097000.1.v3.0	PtrLAC15	MRE	AACCTAA	632	652	677	7	+	Petroselinum crispum	MYB binding site involved in light responsiveness
Potri.006G097000.1.v3.0	PtrLAC15	MRE	AACCTAA	1827	1847	1872	7	+	Petroselinum crispum	MYB binding site involved in light responsiveness
Potri.006G097000.1.v3.0	PtrLAC15	AT1-motif	AATTATTTTTTATT	128	148	173	13	+	Solanum tuberosum	light responsiveness
Potri.006G097000.1.v3.0	PtrLAC15	TCT-motif	TCTTAC	1765	1785	1810	6	-	Arabidopsis thaliana	light responsiveness
Potri.006G097000.1.v3.0	PtrLAC15	TCT-motif	TCTTAC	1777	1797	1822	6	-	Arabidopsis thaliana	light responsiveness
Potri.006G097000.1.v3.0	PtrLAC15	GT1-motif	GGTTAA	218	238	263	6	-	Arabidopsis thaliana	light responsiveness
Potri.006G097000.1.v3.0	PtrLAC15	GT1-motif	GGTTAAT	269	289	314	7	-	Avena sativa	light responsiveness
Potri.006G097000.1.v3.0	PtrLAC15	GT1-motif	GGTTAA	270	290	315	6	-	Arabidopsis thaliana	light responsiveness
Potri.006G097000.1.v3.0	PtrLAC15	GT1-motif	GGTTAA	1046	1066	1091	6	-	Arabidopsis thaliana	light responsiveness
Potri.006G097000.1.v3.0	PtrLAC15	GT1-motif	GGTTAA	1379	1399	1424	6	-	Arabidopsis thaliana	light responsiveness
Potri.006G097000.1.v3.0	PtrLAC15	G-box	CACGTG	864	884	909	6	+	Arabidopsis thaliana	light responsiveness
Potri.006G097000.1.v3.0	PtrLAC15	ACE	CTAACGTATT	618	638	663	9	-	Petroselinum crispum	light responsiveness
Potri.006G097000.1.v3.0	PtrLAC15	TGA-element	AACGAC	1842	1862	1887	6	+	Brassica oleracea	auxin responsiveness
Potri.006G097000.1.v3.0	PtrLAC15	Box 4	ATTAAT	686	706	731	6	+	Petroselinum crispum	light responsiveness
Potri.006G097000.1.v3.0	PtrLAC15	Box 4	ATTAAT	1475	1495	1520	6	-	Petroselinum crispum	light responsiveness
Potri.006G097000.1.v3.0	PtrLAC15	Box 4	ATTAAT	1682	1702	1727	6	-	Petroselinum crispum	light responsiveness
Potri.006G097000.1.v3.0	PtrLAC15	ABRE	ACGTG	620	640	665	5	-	Arabidopsis thaliana	abscisic acid responsiveness
Potri.006G097000.1.v3.0	PtrLAC15	ABRE	CACGTG	864	884	909	6	+	Arabidopsis thaliana	abscisic acid responsiveness
Potri.006G097000.1.v3.0	PtrLAC15	ABRE	ACGTG	865	885	910	5	+	Arabidopsis thaliana	abscisic acid responsiveness
Potri.006G097100.1.v3.0	PtrLAC49	ABRE	CACGTG	867	887	912	6	+	Arabidopsis thaliana	abscisic acid responsiveness
Potri.006G097100.1.v3.0	PtrLAC49	ABRE	ACGTG	868	888	913	5	+	Arabidopsis thaliana	abscisic acid responsiveness
Potri.006G097100.1.v3.0	PtrLAC49	ABRE	ACGTG	892	912	937	5	+	Arabidopsis thaliana	abscisic acid responsiveness
Potri.006G097100.1.v3.0	PtrLAC49	Box 4	ATTAAT	1475	1495	1520	6	-	Petroselinum crispum	light responsiveness
Potri.006G097100.1.v3.0	PtrLAC49	Box 4	ATTAAT	1590	1610	1635	6	-	Petroselinum crispum	light responsiveness
Potri.006G097100.1.v3.0	PtrLAC49	Box 4	ATTAAT	1682	1702	1727	6	-	Petroselinum crispum	light responsiveness
Potri.006G097100.1.v3.0	PtrLAC49	Gap-box	CAAATGAA(A/G)A	1460	1480	1505	9.5	+	Arabidopsis thaliana	light responsiveness
Potri.006G097100.1.v3.0	PtrLAC49	TGA-element	AACGAC	1842	1862	1887	6	+	Brassica oleracea	auxin responsiveness
Potri.006G097100.1.v3.0	PtrLAC49	G-box	CACGTG	867	887	912	6	+	Arabidopsis thaliana	light responsiveness
Potri.006G097100.1.v3.0	PtrLAC49	G-box	CAGACGTGGCA	889	909	934	10	+	Nicotiana plumbaginifolia	light responsiveness
Potri.006G097100.1.v3.0	PtrLAC49	G-box	CACGTC	891	911	936	6	-	Zea mays	light responsiveness
Potri.006G097100.1.v3.0	PtrLAC49	MRE	AACCTAA	-10	10	35	7	-	Petroselinum crispum	MYB binding site involved in light responsiveness
Potri.006G097100.1.v3.0	PtrLAC49	MRE	AACCTAA	1827	1847	1872	7	+	Petroselinum crispum	MYB binding site involved in light responsiveness
Potri.006G097100.1.v3.0	PtrLAC49	AT1-motif	AATTATTTTTTATT	133	153	178	13	+	Solanum tuberosum	light responsiveness
Potri.006G097100.1.v3.0	PtrLAC49	AT1-motif	AATTATTTTTTATT	693	713	738	14	+	Solanum tuberosum	light responsiveness
Potri.006G097100.1.v3.0	PtrLAC49	AT1-motif	AATTATTTTTTATT	807	827	852	13	-	Solanum tuberosum	light responsiveness
Potri.006G097100.1.v3.0	PtrLAC49	GT1-motif	GGTTAA	223	243	268	6	-	Arabidopsis thaliana	light responsiveness
Potri.006G097100.1.v3.0	PtrLAC49	GT1-motif	GGTTAAT	274	294	319	7	-	Avena sativa	light responsiveness
Potri.006G097100.1.v3.0	PtrLAC49	GT1-motif	GGTTAA	275	295	320	6	-	Arabidopsis thaliana	light responsiveness
Potri.006G097100.1.v3.0	PtrLAC49	GT1-motif	GGTTAA	635	655	680	6	+	Arabidopsis thaliana	light responsiveness
Potri.006G097100.1.v3.0	PtrLAC49	GT1-motif	GGTTAAT	749	769	794	7	-	Avena sativa	light responsiveness
Potri.006G097100.1.v3.0	PtrLAC49	GT1-motif	GGTTAA	750	770	795	6	-	Arabidopsis thaliana	light responsiveness
Potri.006G097100.1.v3.0	PtrLAC49	TCT-motif	TCTTAC	1393	1413	1438	6	+	Arabidopsis thaliana	light responsiveness
Potri.006G097100.1.v3.0	PtrLAC49	TCT-motif	TCTTAC	1765	1785	1810	6	-	Arabidopsis thaliana	light responsiveness
Potri.006G097100.1.v3.0	PtrLAC49	TCT-motif	TCTTAC	1777	1797	1822	6	-	Arabidopsis thaliana	light responsiveness
Potri.006G097100.1.v3.0	PtrLAC49	GARE-motif	TCTGTTG	1493	1513	1538	7	+	Brassica oleracea	gibberellin-responsiveness
Potri.006G097100.1.v3.0	PtrLAC49	GARE-motif	TCTGTTG	1939	1959	1984	7	-	Brassica oleracea	gibberellin-responsiveness
Potri.006G097100.1.v3.0	PtrLAC49	I-box	AAGATAAGGCT	1779	1799	1824	10	+	Gossypium hirsutum	light responsiveness
Potri.006G097100.1.v3.0	PtrLAC49	G-Box	CACGTG	867	887	912	6	+	Pisum sativum	light responsiveness
Potri.006G097100.1.v3.0	PtrLAC49	TC-rich repeats	GTTTTCTTAC	446	466	491	9	-	Nicotiana tabacum	defense and stress responsiveness
Potri.006G097100.1.v3.0	PtrLAC49	TC-rich repeats	GTTTTCTTAC	1765	1785	1810	9	-	Nicotiana tabacum	defense and stress responsiveness
Potri.006G097100.1.v3.0	PtrLAC49	TATC-box	TATCCCA	70	90	115	7	-	Oryza sativa	gibberellin-responsiveness
Potri.007G023300.1.v3.0	PtrLAC17	G-box	CACGTG	1403	1423	1448	6	-	Arabidopsis thaliana	light responsiveness
Potri.007G023300.1.v3.0	PtrLAC17	AuxRR-core	GGTCCAT	1322	1342	1367	7	-	Nicotiana tabacum	auxin responsiveness
Potri.007G023300.1.v3.0	PtrLAC17	AuxRR-core	GGTCCAT	1371	1391	1416	7	+	Nicotiana tabacum	auxin responsiveness
Potri.007G023300.1.v3.0	PtrLAC17	AE-box	AGAAACAA	732	752	777	8	+	Arabidopsis thaliana	light responsiveness
Potri.007G023300.1.v3.0	PtrLAC17	AE-box	AGAAACAA	831	851	876	8	+	Arabidopsis thaliana	light responsiveness
Potri.007G023300.1.v3.0	PtrLAC17	MRE	AACCTAA	150	170	195	7	-	Petroselinum crispum	MYB binding site involved in light responsiveness
Potri.007G023300.1.v3.0	PtrLAC17	MRE	AACCTAA	406	426	451	7	-	Petroselinum crispum	MYB binding site involved in light responsiveness
Potri.007G023300.1.v3.0	PtrLAC17	MRE	AACCTAA	1150	1170	1195	7	+	Petroselinum crispum	MYB binding site involved in light responsiveness
Potri.007G023300.1.v3.0	PtrLAC17	GT1-motif	GGTTAAT	153	173	198	7	+	Avena sativa	light responsiveness
Potri.007G023300.1.v3.0	PtrLAC17	GT1-motif	GGTTAA	245	265	290	6	+	Arabidopsis thaliana	light responsiveness
Potri.007G023300.1.v3.0	PtrLAC17	GT1-motif	GGTTAAT	1147	1167	1192	7	-	Avena sativa	light responsiveness
Potri.007G023300.1.v3.0	PtrLAC17	GT1-motif	GGTTAA	1148	1168	1193	6	-	Arabidopsis thaliana	light responsiveness
Potri.007G023300.1.v3.0	PtrLAC17	GT1-motif	GGTTAA	1744	1764	1789	6	+	Arabidopsis thaliana	light responsiveness
Potri.007G023300.1.v3.0	PtrLAC17	ABRE	ACGTG	871	891	916	5	+	Arabidopsis thaliana	abscisic acid responsiveness
Potri.007G023300.1.v3.0	PtrLAC17	ABRE	CACGTG	1403	1423	1448	6	-	Arabidopsis thaliana	abscisic acid responsiveness
Potri.007G023300.1.v3.0	PtrLAC17	ABRE	ACGTG	1404	1424	1449	5	+	Arabidopsis thaliana	abscisic acid responsiveness
Potri.007G023300.1.v3.0	PtrLAC17	Box 4	ATTAAT	1697	1717	1742	6	-	Petroselinum crispum	light responsiveness
Potri.007G023300.1.v3.0	PtrLAC17	TGA-element	AACGAC	644	664	689	6	-	Brassica oleracea	auxin responsiveness
Potri.007G023300.1.v3.0	PtrLAC17	TC-rich repeats	ATTCTCTAAC	127	147	172	9	-	Nicotiana tabacum	defense and stress responsiveness
Potri.007G023300.1.v3.0	PtrLAC17	TC-rich repeats	GTTTTCTTAC	445	465	490	9	-	Nicotiana tabacum	defense and stress responsiveness
Potri.007G023300.1.v3.0	PtrLAC17	TC-rich repeats	ATTCTCTAAC	743	763	788	9	-	Nicotiana tabacum	defense and stress responsiveness
Potri.007G023300.1.v3.0	PtrLAC17	CGTCA-motif	CGTCA	1765	1785	1810	5	+	Hordeum vulgare	MeJA-responsiveness
Potri.007G023300.1.v3.0	PtrLAC17	ATC-motif	AGCTATCCA	1396	1416	1441	9	+	Arabidopsis thaliana	light responsiveness
Potri.007G023300.1.v3.0	PtrLAC17	I-box	atGATAAGGTC	0	20	45	10	+	Helianthus annuus	light responsiveness
Potri.007G023300.1.v3.0	PtrLAC17	I-box	gGATAAGGTG	1	21	46	9	+	Zea mays	light responsiveness
Potri.007G023300.1.v3.0	PtrLAC17	G-Box	CACGTT	870	890	915	6	-	Pisum sativum	light responsiveness
Potri.007G023300.1.v3.0	PtrLAC17	G-Box	CACGTG	1403	1423	1448	6	-	Pisum sativum	light responsiveness
Potri.007G023300.1.v3.0	PtrLAC17	TGACG-motif	TGACG	1765	1785	1810	5	-	Hordeum vulgare	MeJA-responsiveness
Potri.007G023300.1.v3.0	PtrLAC17	GATA-motif	AAGATAAGATT	768	788	813	10	+	Arabidopsis thaliana	light responsiveness
Potri.007G023300.1.v3.0	PtrLAC17	GATA-motif	AAGGATAAGG	1941	1961	1986	9	-	Solanum tuberosum	light responsiveness
Potri.008G064000.1.v3.0	PtrLAC18	chs-Unit 1 m1	ACCTAACCCGG	1839	1859	1884	10	+	Zea mays	light responsiveness
Potri.008G064000.1.v3.0	PtrLAC18	G-box	CACGTC	705	725	750	6	-	Zea mays	light responsiveness
Potri.008G064000.1.v3.0	PtrLAC18	GT1-motif	GGTTAA	1507	1527	1552	6	-	Arabidopsis thaliana	light responsiveness
Potri.008G064000.1.v3.0	PtrLAC18	TCT-motif	TCTTAC	460	480	505	6	+	Arabidopsis thaliana	light responsiveness
Potri.008G064000.1.v3.0	PtrLAC18	TCT-motif	TCTTAC	1748	1768	1793	6	+	Arabidopsis thaliana	light responsiveness
Potri.008G064000.1.v3.0	PtrLAC18	ABRE	ACGTG	706	726	751	5	+	Arabidopsis thaliana	abscisic acid responsiveness
Potri.008G064000.1.v3.0	PtrLAC18	Box 4	ATTAAT	71	91	116	6	+	Petroselinum crispum	light responsiveness
Potri.008G064000.1.v3.0	PtrLAC18	Box 4	ATTAAT	204	224	249	6	+	Petroselinum crispum	light responsiveness
Potri.008G064000.1.v3.0	PtrLAC18	Box 4	ATTAAT	221	241	266	6	+	Petroselinum crispum	light responsiveness
Potri.008G064000.1.v3.0	PtrLAC18	Box 4	ATTAAT	419	439	464	6	+	Petroselinum crispum	light responsiveness
Potri.008G064000.1.v3.0	PtrLAC18	Box 4	ATTAAT	766	786	811	6	+	Petroselinum crispum	light responsiveness
Potri.008G064000.1.v3.0	PtrLAC18	Box 4	ATTAAT	1192	1212	1237	6	-	Petroselinum crispum	light responsiveness
Potri.008G064000.1.v3.0	PtrLAC18	Box 4	ATTAAT	1222	1242	1267	6	-	Petroselinum crispum	light responsiveness
Potri.008G064000.1.v3.0	PtrLAC18	Box 4	ATTAAT	1232	1252	1277	6	-	Petroselinum crispum	light responsiveness
Potri.008G064000.1.v3.0	PtrLAC18	Box 4	ATTAAT	1732	1752	1777	6	-	Petroselinum crispum	light responsiveness
Potri.008G064000.1.v3.0	PtrLAC18	TGA-element	AACGAC	1722	1742	1767	6	-	Brassica oleracea	auxin responsiveness
Potri.008G064000.1.v3.0	PtrLAC18	TC-rich repeats	GTTTTCTTAC	869	889	914	9	-	Nicotiana tabacum	defense and stress responsiveness
Potri.008G064000.1.v3.0	PtrLAC18	TC-rich repeats	GTTTTCTTAC	1794	1814	1839	9	-	Nicotiana tabacum	defense and stress responsiveness
Potri.008G064000.1.v3.0	PtrLAC18	MBS	CAACTG	1680	1700	1725	6	-	Arabidopsis thaliana	drought-inducibility
Potri.008G073700.1.v3.0	PtrLAC19	TGACG-motif	TGACG	567	587	612	5	-	Hordeum vulgare	MeJA-responsiveness
Potri.008G073700.1.v3.0	PtrLAC19	TGACG-motif	TGACG	1515	1535	1560	5	+	Hordeum vulgare	MeJA-responsiveness
Potri.008G073700.1.v3.0	PtrLAC19	G-Box	CACGTG	1326	1346	1371	6	-	Pisum sativum	light responsiveness
Potri.008G073700.1.v3.0	PtrLAC19	AAAC-motif	CAATCAAAACCT	1824	1844	1869	11	+	Spinacia oleracea	light responsiveness
Potri.008G073700.1.v3.0	PtrLAC19	CGTCA-motif	CGTCA	567	587	612	5	+	Hordeum vulgare	MeJA-responsiveness
Potri.008G073700.1.v3.0	PtrLAC19	CGTCA-motif	CGTCA	1515	1535	1560	5	-	Hordeum vulgare	MeJA-responsiveness
Potri.008G073700.1.v3.0	PtrLAC19	TGA-element	AACGAC	683	703	728	6	-	Brassica oleracea	auxin responsiveness
Potri.008G073700.1.v3.0	PtrLAC19	TGA-element	AACGAC	1189	1209	1234	6	-	Brassica oleracea	auxin responsiveness
Potri.008G073700.1.v3.0	PtrLAC19	ABRE	ACGTG	565	585	610	5	-	Arabidopsis thaliana	abscisic acid responsiveness
Potri.008G073700.1.v3.0	PtrLAC19	ABRE	ACGTG	1077	1097	1122	5	-	Arabidopsis thaliana	abscisic acid responsiveness
Potri.008G073700.1.v3.0	PtrLAC19	ABRE	ACGTG	1116	1136	1161	5	-	Arabidopsis thaliana	abscisic acid responsiveness
Potri.008G073700.1.v3.0	PtrLAC19	ABRE	CGCACGTGTC	1324	1344	1369	9	+	Hordeum vulgare	abscisic acid responsiveness
Potri.008G073700.1.v3.0	PtrLAC19	ABRE	CACGTG	1326	1346	1371	6	-	Arabidopsis thaliana	abscisic acid responsiveness
Potri.008G073700.1.v3.0	PtrLAC19	ABRE	ACGTG	1327	1347	1372	5	+	Arabidopsis thaliana	abscisic acid responsiveness
Potri.008G073700.1.v3.0	PtrLAC19	Box 4	ATTAAT	20	40	65	6	+	Petroselinum crispum	light responsiveness
Potri.008G073700.1.v3.0	PtrLAC19	Box 4	ATTAAT	703	723	748	6	+	Petroselinum crispum	light responsiveness
Potri.008G073700.1.v3.0	PtrLAC19	Box 4	ATTAAT	966	986	1011	6	+	Petroselinum crispum	light responsiveness
Potri.008G073700.1.v3.0	PtrLAC19	AuxRR-core	GGTCCAT	783	803	828	7	+	Nicotiana tabacum	auxin responsiveness
Potri.008G073700.1.v3.0	PtrLAC19	MRE	AACCTAA	1831	1851	1876	7	+	Petroselinum crispum	MYB binding site involved in light responsiveness
Potri.008G073700.1.v3.0	PtrLAC19	GT1-motif	GGTTAA	221	241	266	6	-	Arabidopsis thaliana	light responsiveness
Potri.008G073700.1.v3.0	PtrLAC19	GT1-motif	GGTTAAT	1067	1087	1112	7	-	Avena sativa	light responsiveness
Potri.008G073700.1.v3.0	PtrLAC19	GT1-motif	GGTTAA	1068	1088	1113	6	-	Arabidopsis thaliana	light responsiveness
Potri.008G073700.1.v3.0	PtrLAC19	GT1-motif	GGTTAA	1339	1359	1384	6	-	Arabidopsis thaliana	light responsiveness
Potri.008G073700.1.v3.0	PtrLAC19	GT1-motif	GGTTAAT	1357	1377	1402	7	+	Avena sativa	light responsiveness
Potri.008G073700.1.v3.0	PtrLAC19	G-box	CACGTC	565	585	610	6	+	Zea mays	light responsiveness
Potri.008G073700.1.v3.0	PtrLAC19	G-box	CACGTC	1077	1097	1122	6	+	Zea mays	light responsiveness
Potri.008G073700.1.v3.0	PtrLAC19	G-box	CACGTC	1116	1136	1161	6	+	Zea mays	light responsiveness
Potri.008G073700.1.v3.0	PtrLAC19	G-box	CACGTG	1326	1346	1371	6	-	Arabidopsis thaliana	light responsiveness
Potri.009G034500.1.v3.0	PtrLAC20	ATC-motif	AGTAATCT	943	963	988	8	-	Spinacia oleracea	light responsiveness
Potri.009G034500.1.v3.0	PtrLAC20	LTR	CCGAAA	1350	1370	1395	6	-	Hordeum vulgare	low-temperature responsiveness
Potri.009G034500.1.v3.0	PtrLAC20	GATA-motif	GATAGGA	759	779	804	7	+	Arabidopsis thaliana	light responsiveness
Potri.009G034500.1.v3.0	PtrLAC20	GATA-motif	GATAGGA	1371	1391	1416	7	-	Arabidopsis thaliana	light responsiveness
Potri.009G034500.1.v3.0	PtrLAC20	GATA-motif	GATAGGA	1917	1937	1962	7	-	Arabidopsis thaliana	light responsiveness
Potri.009G034500.1.v3.0	PtrLAC20	MBS	CAACTG	322	342	367	6	-	Arabidopsis thaliana	drought-inducibility
Potri.009G034500.1.v3.0	PtrLAC20	LAMP-element	CTTTATCA	575	595	620	8	+	Pisum sativum	light responsiveness
Potri.009G034500.1.v3.0	PtrLAC20	G-Box	CACGTT	1424	1444	1469	6	-	Pisum sativum	light responsiveness
Potri.009G034500.1.v3.0	PtrLAC20	GA-motif	ATAGATAA	205	225	250	8	-	Arabidopsis thaliana	light responsiveness
Potri.009G034500.1.v3.0	PtrLAC20	GT1-motif	GGTTAAT	65	85	110	7	-	Avena sativa	light responsiveness
Potri.009G034500.1.v3.0	PtrLAC20	GT1-motif	GGTTAA	66	86	111	6	-	Arabidopsis thaliana	light responsiveness
Potri.009G034500.1.v3.0	PtrLAC20	GT1-motif	GTGTGTGAA	852	872	897	9	-	Solanum tuberosum	light responsiveness
Potri.009G034500.1.v3.0	PtrLAC20	GT1-motif	GGTTAA	1656	1676	1701	6	+	Arabidopsis thaliana	light responsiveness
Potri.009G034500.1.v3.0	PtrLAC20	TCT-motif	TCTTAC	1873	1893	1918	6	-	Arabidopsis thaliana	light responsiveness
Potri.009G034500.1.v3.0	PtrLAC20	TCCC-motif	TCTCCCT	1725	1745	1770	7	+	Spinacia oleracea	light responsiveness
Potri.009G034500.1.v3.0	PtrLAC20	ABRE	ACGTG	1425	1445	1470	5	+	Arabidopsis thaliana	abscisic acid responsiveness
Potri.009G034500.1.v3.0	PtrLAC20	Box 4	ATTAAT	1545	1565	1590	6	-	Petroselinum crispum	light responsiveness
Potri.009G042500.1.v3.0	PtrLAC21	LTR	CCGAAA	1491	1511	1536	6	-	Hordeum vulgare	low-temperature responsiveness
Potri.009G042500.1.v3.0	PtrLAC21	CGTCA-motif	CGTCA	1431	1451	1476	5	-	Hordeum vulgare	MeJA-responsiveness
Potri.009G042500.1.v3.0	PtrLAC21	CGTCA-motif	CGTCA	1507	1527	1552	5	+	Hordeum vulgare	MeJA-responsiveness
Potri.009G042500.1.v3.0	PtrLAC21	CGTCA-motif	CGTCA	1745	1765	1790	5	-	Hordeum vulgare	MeJA-responsiveness
Potri.009G042500.1.v3.0	PtrLAC21	chs-CMA1a	TTACTTAA	510	530	555	8	+	Daucus carota	light responsiveness
Potri.009G042500.1.v3.0	PtrLAC21	P-box	CCTTTTG	482	502	527	7	-	Oryza sativa	gibberellin-responsiveness
Potri.009G042500.1.v3.0	PtrLAC21	I-box	cGATAAGGCG	458	478	503	9	-	Zea mays	light responsiveness
Potri.009G042500.1.v3.0	PtrLAC21	GATA-motif	AAGATAAGATT	717	737	762	10	+	Arabidopsis thaliana	light responsiveness
Potri.009G042500.1.v3.0	PtrLAC21	TGACG-motif	TGACG	1431	1451	1476	5	+	Hordeum vulgare	MeJA-responsiveness
Potri.009G042500.1.v3.0	PtrLAC21	TGACG-motif	TGACG	1507	1527	1552	5	-	Hordeum vulgare	MeJA-responsiveness
Potri.009G042500.1.v3.0	PtrLAC21	TGACG-motif	TGACG	1745	1765	1790	5	+	Hordeum vulgare	MeJA-responsiveness
Potri.009G042500.1.v3.0	PtrLAC21	MBS	CAACTG	1606	1626	1651	6	-	Arabidopsis thaliana	drought-inducibility
Potri.009G042500.1.v3.0	PtrLAC21	MBS	CAACTG	1680	1700	1725	6	-	Arabidopsis thaliana	drought-inducibility
Potri.009G042500.1.v3.0	PtrLAC21	G-box	CACGAC	273	293	318	6	-	Zea mays	light responsiveness
Potri.009G042500.1.v3.0	PtrLAC21	G-box	CACGAC	879	899	924	6	-	Zea mays	light responsiveness
Potri.009G042500.1.v3.0	PtrLAC21	G-box	TACGTG	947	967	992	6	-	Arabidopsis thaliana	light responsiveness
Potri.009G042500.1.v3.0	PtrLAC21	GT1-motif	GGTTAA	158	178	203	6	+	Arabidopsis thaliana	light responsiveness
Potri.009G042500.1.v3.0	PtrLAC21	GT1-motif	GGTTAA	514	534	559	6	-	Arabidopsis thaliana	light responsiveness
Potri.009G042500.1.v3.0	PtrLAC21	TCCC-motif	TCTCCCT	1955	1975	2000	7	-	Spinacia oleracea	light responsiveness
Potri.009G042500.1.v3.0	PtrLAC21	TCT-motif	TCTTAC	815	835	860	6	-	Arabidopsis thaliana	light responsiveness
Potri.009G042500.1.v3.0	PtrLAC21	AE-box	AGAAACAA	1753	1773	1798	8	-	Arabidopsis thaliana	light responsiveness
Potri.009G042500.1.v3.0	PtrLAC21	ABRE	CGTACGTGCA	945	965	990	9	-	Hordeum vulgare	abscisic acid responsiveness
Potri.009G042500.1.v3.0	PtrLAC21	ABRE	ACGTG	947	967	992	5	-	Arabidopsis thaliana	abscisic acid responsiveness
Potri.009G042500.1.v3.0	PtrLAC21	Box 4	ATTAAT	1194	1214	1239	6	-	Petroselinum crispum	light responsiveness
Potri.009G042500.1.v3.0	PtrLAC21	Box 4	ATTAAT	1417	1437	1462	6	-	Petroselinum crispum	light responsiveness
Potri.009G042500.1.v3.0	PtrLAC21	Box 4	ATTAAT	1847	1867	1892	6	-	Petroselinum crispum	light responsiveness
Potri.009G042500.1.v3.0	PtrLAC21	TGA-element	AACGAC	1823	1843	1868	6	+	Brassica oleracea	auxin responsiveness
Potri.009G102700.1.v3.0	PtrLAC22	Box II	TGGTAATAA	485	505	530	9	+	Solanum tuberosum	light responsiveness
Potri.009G102700.1.v3.0	PtrLAC22	AE-box	AGAAACAA	652	672	697	8	+	Arabidopsis thaliana	light responsiveness
Potri.009G102700.1.v3.0	PtrLAC22	MRE	AACCTAA	1534	1554	1579	7	+	Petroselinum crispum	MYB binding site involved in light responsiveness
Potri.009G102700.1.v3.0	PtrLAC22	TCT-motif	TCTTAC	564	584	609	6	-	Arabidopsis thaliana	light responsiveness
Potri.009G102700.1.v3.0	PtrLAC22	TCT-motif	TCTTAC	1546	1566	1591	6	-	Arabidopsis thaliana	light responsiveness
Potri.009G102700.1.v3.0	PtrLAC22	GT1-motif	GGTTAA	1041	1061	1086	6	-	Arabidopsis thaliana	light responsiveness
Potri.009G102700.1.v3.0	PtrLAC22	GT1-motif	GGTTAA	1593	1613	1638	6	+	Arabidopsis thaliana	light responsiveness
Potri.009G102700.1.v3.0	PtrLAC22	TGACG-motif	TGACG	408	428	453	5	-	Hordeum vulgare	MeJA-responsiveness
Potri.009G102700.1.v3.0	PtrLAC22	TGACG-motif	TGACG	429	449	474	5	-	Hordeum vulgare	MeJA-responsiveness
Potri.009G102700.1.v3.0	PtrLAC22	TGACG-motif	TGACG	628	648	673	5	+	Hordeum vulgare	MeJA-responsiveness
Potri.009G102700.1.v3.0	PtrLAC22	TGACG-motif	TGACG	673	693	718	5	+	Hordeum vulgare	MeJA-responsiveness
Potri.009G102700.1.v3.0	PtrLAC22	GATA-motif	GATAGGG	1789	1809	1834	7	-	Pisum sativum	light responsiveness
Potri.009G102700.1.v3.0	PtrLAC22	TC-rich repeats	ATTCTCTAAC	332	352	377	9	+	Nicotiana tabacum	defense and stress responsiveness
Potri.009G102700.1.v3.0	PtrLAC22	TC-rich repeats	ATTCTCTAAC	349	369	394	9	-	Nicotiana tabacum	defense and stress responsiveness
Potri.009G102700.1.v3.0	PtrLAC22	TC-rich repeats	GTTTTCTTAC	1546	1566	1591	9	-	Nicotiana tabacum	defense and stress responsiveness
Potri.009G102700.1.v3.0	PtrLAC22	CGTCA-motif	CGTCA	408	428	453	5	+	Hordeum vulgare	MeJA-responsiveness
Potri.009G102700.1.v3.0	PtrLAC22	CGTCA-motif	CGTCA	429	449	474	5	+	Hordeum vulgare	MeJA-responsiveness
Potri.009G102700.1.v3.0	PtrLAC22	CGTCA-motif	CGTCA	628	648	673	5	-	Hordeum vulgare	MeJA-responsiveness
Potri.009G102700.1.v3.0	PtrLAC22	CGTCA-motif	CGTCA	673	693	718	5	-	Hordeum vulgare	MeJA-responsiveness
Potri.009G102700.1.v3.0	PtrLAC22	LTR	CCGAAA	452	472	497	6	+	Hordeum vulgare	low-temperature responsiveness
Potri.009G156600.1.v3.0	PtrLAC23	ABRE	ACGTG	841	861	886	5	+	Arabidopsis thaliana	abscisic acid responsiveness
Potri.009G156600.1.v3.0	PtrLAC23	Box 4	ATTAAT	72	92	117	6	+	Petroselinum crispum	light responsiveness
Potri.009G156600.1.v3.0	PtrLAC23	Box 4	ATTAAT	76	96	121	6	+	Petroselinum crispum	light responsiveness
Potri.009G156600.1.v3.0	PtrLAC23	Box 4	ATTAAT	278	298	323	6	+	Petroselinum crispum	light responsiveness
Potri.009G156600.1.v3.0	PtrLAC23	Box 4	ATTAAT	539	559	584	6	+	Petroselinum crispum	light responsiveness
Potri.009G156600.1.v3.0	PtrLAC23	Box 4	ATTAAT	798	818	843	6	+	Petroselinum crispum	light responsiveness
Potri.009G156600.1.v3.0	PtrLAC23	Box 4	ATTAAT	903	923	948	6	+	Petroselinum crispum	light responsiveness
Potri.009G156600.1.v3.0	PtrLAC23	Box 4	ATTAAT	948	968	993	6	+	Petroselinum crispum	light responsiveness
Potri.009G156600.1.v3.0	PtrLAC23	Box 4	ATTAAT	1694	1714	1739	6	-	Petroselinum crispum	light responsiveness
Potri.009G156600.1.v3.0	PtrLAC23	G-box	TACGTG	840	860	885	6	+	Arabidopsis thaliana	light responsiveness
Potri.009G156600.1.v3.0	PtrLAC23	GT1-motif	GGTTAAT	181	201	226	7	+	Avena sativa	light responsiveness
Potri.009G156600.1.v3.0	PtrLAC23	GT1-motif	GGTTAA	871	891	916	6	+	Arabidopsis thaliana	light responsiveness
Potri.009G156600.1.v3.0	PtrLAC23	GT1-motif	GGTTAAT	1596	1616	1641	7	-	Avena sativa	light responsiveness
Potri.009G156600.1.v3.0	PtrLAC23	GT1-motif	GGTTAA	1597	1617	1642	6	-	Arabidopsis thaliana	light responsiveness
Potri.009G156600.1.v3.0	PtrLAC23	GA-motif	ATAGATAA	400	420	445	8	-	Arabidopsis thaliana	light responsiveness
Potri.009G156600.1.v3.0	PtrLAC23	TCT-motif	TCTTAC	1877	1897	1922	6	-	Arabidopsis thaliana	light responsiveness
Potri.009G156600.1.v3.0	PtrLAC23	MBS	CAACTG	521	541	566	6	-	Arabidopsis thaliana	drought-inducibility
Potri.009G156600.1.v3.0	PtrLAC23	chs-CMA2a	TCACTTGA	1445	1465	1490	8	+	Petroselinum crispum	light responsiveness
Potri.009G156600.1.v3.0	PtrLAC23	GATA-motif	GATAGGA	60	80	105	7	+	Arabidopsis thaliana	light responsiveness
Potri.009G156600.1.v3.0	PtrLAC23	GATA-motif	GATAGGA	1919	1939	1964	7	-	Arabidopsis thaliana	light responsiveness
Potri.009G156800.1.v3.0	PtrLAC24	G-box	TACGTG	842	862	887	6	+	Arabidopsis thaliana	light responsiveness
Potri.009G156800.1.v3.0	PtrLAC24	GA-motif	ATAGATAA	402	422	447	8	-	Arabidopsis thaliana	light responsiveness
Potri.009G156800.1.v3.0	PtrLAC24	MRE	AACCTAA	186	206	231	7	-	Petroselinum crispum	MYB binding site involved in light responsiveness
Potri.009G156800.1.v3.0	PtrLAC24	GATA-motif	GATAGGA	1919	1939	1964	7	-	Arabidopsis thaliana	light responsiveness
Potri.009G156800.1.v3.0	PtrLAC24	MBS	CAACTG	523	543	568	6	-	Arabidopsis thaliana	drought-inducibility
Potri.009G156800.1.v3.0	PtrLAC24	TCT-motif	TCTTAC	1877	1897	1922	6	-	Arabidopsis thaliana	light responsiveness
Potri.009G156800.1.v3.0	PtrLAC24	GT1-motif	GGTTAAT	50	70	95	7	+	Avena sativa	light responsiveness
Potri.009G156800.1.v3.0	PtrLAC24	GT1-motif	GGTTAA	873	893	918	6	+	Arabidopsis thaliana	light responsiveness
Potri.009G156800.1.v3.0	PtrLAC24	GT1-motif	GGTTAAT	1598	1618	1643	7	-	Avena sativa	light responsiveness
Potri.009G156800.1.v3.0	PtrLAC24	GT1-motif	GGTTAA	1599	1619	1644	6	-	Arabidopsis thaliana	light responsiveness
Potri.009G156800.1.v3.0	PtrLAC24	Box 4	ATTAAT	148	168	193	6	+	Petroselinum crispum	light responsiveness
Potri.009G156800.1.v3.0	PtrLAC24	Box 4	ATTAAT	541	561	586	6	+	Petroselinum crispum	light responsiveness
Potri.009G156800.1.v3.0	PtrLAC24	Box 4	ATTAAT	800	820	845	6	+	Petroselinum crispum	light responsiveness
Potri.009G156800.1.v3.0	PtrLAC24	Box 4	ATTAAT	905	925	950	6	+	Petroselinum crispum	light responsiveness
Potri.009G156800.1.v3.0	PtrLAC24	Box 4	ATTAAT	950	970	995	6	+	Petroselinum crispum	light responsiveness
Potri.009G156800.1.v3.0	PtrLAC24	Box 4	ATTAAT	1696	1716	1741	6	-	Petroselinum crispum	light responsiveness
Potri.009G156800.1.v3.0	PtrLAC24	ABRE	ACGTG	843	863	888	5	+	Arabidopsis thaliana	abscisic acid responsiveness
Potri.009G156800.1.v3.0	PtrLAC24	chs-CMA2a	TCACTTGA	1447	1467	1492	8	+	Petroselinum crispum	light responsiveness
Potri.010G183500.1.v3.0	PtrLAC25	G-box	CACGTG	1160	1180	1205	6	-	Arabidopsis thaliana	light responsiveness
Potri.010G183500.1.v3.0	PtrLAC25	G-box	CACGTC	1548	1568	1593	6	+	Zea mays	light responsiveness
Potri.010G183500.1.v3.0	PtrLAC25	ACE	CTAACGTATT	693	713	738	9	-	Petroselinum crispum	light responsiveness
Potri.010G183500.1.v3.0	PtrLAC25	MRE	AACCTAA	619	639	664	7	+	Petroselinum crispum	MYB binding site involved in light responsiveness
Potri.010G183500.1.v3.0	PtrLAC25	MRE	AACCTAA	1847	1867	1892	7	+	Petroselinum crispum	MYB binding site involved in light responsiveness
Potri.010G183500.1.v3.0	PtrLAC25	TCCC-motif	TCTCCCT	1100	1120	1145	7	-	Spinacia oleracea	light responsiveness
Potri.010G183500.1.v3.0	PtrLAC25	GT1-motif	GGTTAAT	318	338	363	7	+	Avena sativa	light responsiveness
Potri.010G183500.1.v3.0	PtrLAC25	GT1-motif	GGTTAA	617	637	662	6	-	Arabidopsis thaliana	light responsiveness
Potri.010G183500.1.v3.0	PtrLAC25	GT1-motif	GGTTAAT	739	759	784	7	+	Avena sativa	light responsiveness
Potri.010G183500.1.v3.0	PtrLAC25	Box 4	ATTAAT	98	118	143	6	+	Petroselinum crispum	light responsiveness
Potri.010G183500.1.v3.0	PtrLAC25	Box 4	ATTAAT	442	462	487	6	+	Petroselinum crispum	light responsiveness
Potri.010G183500.1.v3.0	PtrLAC25	Box 4	ATTAAT	978	998	1023	6	+	Petroselinum crispum	light responsiveness
Potri.010G183500.1.v3.0	PtrLAC25	Box 4	ATTAAT	1053	1073	1098	6	-	Petroselinum crispum	light responsiveness
Potri.010G183500.1.v3.0	PtrLAC25	Box 4	ATTAAT	1069	1089	1114	6	-	Petroselinum crispum	light responsiveness
Potri.010G183500.1.v3.0	PtrLAC25	Box 4	ATTAAT	1538	1558	1583	6	-	Petroselinum crispum	light responsiveness
Potri.010G183500.1.v3.0	PtrLAC25	Box 4	ATTAAT	1662	1682	1707	6	-	Petroselinum crispum	light responsiveness
Potri.010G183500.1.v3.0	PtrLAC25	Box 4	ATTAAT	1740	1760	1785	6	-	Petroselinum crispum	light responsiveness
Potri.010G183500.1.v3.0	PtrLAC25	ABRE	ACGTG	32	52	77	5	-	Arabidopsis thaliana	abscisic acid responsiveness
Potri.010G183500.1.v3.0	PtrLAC25	ABRE	ACGTG	718	738	763	5	+	Arabidopsis thaliana	abscisic acid responsiveness
Potri.010G183500.1.v3.0	PtrLAC25	ABRE	ACGTG	1133	1153	1178	5	-	Arabidopsis thaliana	abscisic acid responsiveness
Potri.010G183500.1.v3.0	PtrLAC25	ABRE	CACGTG	1160	1180	1205	6	-	Arabidopsis thaliana	abscisic acid responsiveness
Potri.010G183500.1.v3.0	PtrLAC25	ABRE	ACGTG	1161	1181	1206	5	+	Arabidopsis thaliana	abscisic acid responsiveness
Potri.010G183500.1.v3.0	PtrLAC25	ABRE	ACGTG	1548	1568	1593	5	-	Arabidopsis thaliana	abscisic acid responsiveness
Potri.010G183500.1.v3.0	PtrLAC25	TGA-element	AACGAC	1506	1526	1551	6	-	Brassica oleracea	auxin responsiveness
Potri.010G183500.1.v3.0	PtrLAC25	CGTCA-motif	CGTCA	1550	1570	1595	5	+	Hordeum vulgare	MeJA-responsiveness
Potri.010G183500.1.v3.0	PtrLAC25	LTR	CCGAAA	1843	1863	1888	6	+	Hordeum vulgare	low-temperature responsiveness
Potri.010G183500.1.v3.0	PtrLAC25	G-Box	CACGTT	32	52	77	6	+	Pisum sativum	light responsiveness
Potri.010G183500.1.v3.0	PtrLAC25	G-Box	CACGTT	717	737	762	6	-	Pisum sativum	light responsiveness
Potri.010G183500.1.v3.0	PtrLAC25	G-Box	CACGTT	1133	1153	1178	6	+	Pisum sativum	light responsiveness
Potri.010G183500.1.v3.0	PtrLAC25	G-Box	CACGTG	1160	1180	1205	6	-	Pisum sativum	light responsiveness
Potri.010G183500.1.v3.0	PtrLAC25	MBS	CAACTG	169	189	214	6	+	Arabidopsis thaliana	drought-inducibility
Potri.010G183500.1.v3.0	PtrLAC25	MBS	CAACTG	1374	1394	1419	6	-	Arabidopsis thaliana	drought-inducibility
Potri.010G183500.1.v3.0	PtrLAC25	TGACG-motif	TGACG	1550	1570	1595	5	-	Hordeum vulgare	MeJA-responsiveness
Potri.010G183600.1.v3.0	PtrLAC26	AAAC-motif	CAATCAAAACCT	1834	1854	1879	11	+	Spinacia oleracea	light responsiveness
Potri.010G183600.1.v3.0	PtrLAC26	LAMP-element	CTTTATCA	1266	1286	1311	8	-	Pisum sativum	light responsiveness
Potri.010G183600.1.v3.0	PtrLAC26	GARE-motif	TCTGTTG	1668	1688	1713	7	-	Brassica oleracea	gibberellin-responsiveness
Potri.010G183600.1.v3.0	PtrLAC26	GARE-motif	TCTGTTG	1693	1713	1738	7	+	Brassica oleracea	gibberellin-responsiveness
Potri.010G183600.1.v3.0	PtrLAC26	G-box	TACGTG	1302	1322	1347	6	+	Arabidopsis thaliana	light responsiveness
Potri.010G183600.1.v3.0	PtrLAC26	GT1-motif	GGTTAA	631	651	676	6	+	Arabidopsis thaliana	light responsiveness
Potri.010G183600.1.v3.0	PtrLAC26	GT1-motif	GGTTAA	633	653	678	6	-	Arabidopsis thaliana	light responsiveness
Potri.010G183600.1.v3.0	PtrLAC26	GT1-motif	GGTTAAT	1494	1514	1539	7	+	Avena sativa	light responsiveness
Potri.010G183600.1.v3.0	PtrLAC26	MRE	AACCTAA	1841	1861	1886	7	+	Petroselinum crispum	MYB binding site involved in light responsiveness
Potri.010G183600.1.v3.0	PtrLAC26	Box 4	ATTAAT	17	37	62	6	+	Petroselinum crispum	light responsiveness
Potri.010G183600.1.v3.0	PtrLAC26	Box 4	ATTAAT	1001	1021	1046	6	-	Petroselinum crispum	light responsiveness
Potri.010G183600.1.v3.0	PtrLAC26	Box 4	ATTAAT	1049	1069	1094	6	-	Petroselinum crispum	light responsiveness
Potri.010G183600.1.v3.0	PtrLAC26	Box 4	ATTAAT	1499	1519	1544	6	-	Petroselinum crispum	light responsiveness
Potri.010G183600.1.v3.0	PtrLAC26	Box 4	ATTAAT	1503	1523	1548	6	-	Petroselinum crispum	light responsiveness
Potri.010G183600.1.v3.0	PtrLAC26	Box 4	ATTAAT	1601	1621	1646	6	-	Petroselinum crispum	light responsiveness
Potri.010G183600.1.v3.0	PtrLAC26	ABRE	AACCCGG	612	632	657	7	+	Arabidopsis thaliana	abscisic acid responsiveness
Potri.010G183600.1.v3.0	PtrLAC26	ABRE	AACCCGG	635	655	680	7	+	Arabidopsis thaliana	abscisic acid responsiveness
Potri.010G183600.1.v3.0	PtrLAC26	ABRE	AACCCGG	749	769	794	7	+	Arabidopsis thaliana	abscisic acid responsiveness
Potri.010G183600.1.v3.0	PtrLAC26	ABRE	GACACGTACGT	1299	1319	1344	10	-	Oryza sativa	abscisic acid responsiveness
Potri.010G183600.1.v3.0	PtrLAC26	ABRE	TACGTGTC	1302	1322	1347	8	+	Oryza sativa	abscisic acid responsiveness
Potri.010G183600.1.v3.0	PtrLAC26	ABRE	ACGTG	1303	1323	1348	5	+	Arabidopsis thaliana	abscisic acid responsiveness
Potri.010G183600.1.v3.0	PtrLAC26	TGA-element	AACGAC	796	816	841	6	-	Brassica oleracea	auxin responsiveness
Potri.010G193100.1.v3.0	PtrLAC27	ABRE	ACGTG	969	989	1014	5	+	Arabidopsis thaliana	abscisic acid responsiveness
Potri.010G193100.1.v3.0	PtrLAC27	Box 4	ATTAAT	1590	1610	1635	6	-	Petroselinum crispum	light responsiveness
Potri.010G193100.1.v3.0	PtrLAC27	Box 4	ATTAAT	1651	1671	1696	6	-	Petroselinum crispum	light responsiveness
Potri.010G193100.1.v3.0	PtrLAC27	Box 4	ATTAAT	1744	1764	1789	6	-	Petroselinum crispum	light responsiveness
Potri.010G193100.1.v3.0	PtrLAC27	TCT-motif	TCTTAC	358	378	403	6	+	Arabidopsis thaliana	light responsiveness
Potri.010G193100.1.v3.0	PtrLAC27	TCT-motif	TCTTAC	1235	1255	1280	6	-	Arabidopsis thaliana	light responsiveness
Potri.010G193100.1.v3.0	PtrLAC27	G-box	CACGAC	602	622	647	6	-	Zea mays	light responsiveness
Potri.010G193100.1.v3.0	PtrLAC27	TGACG-motif	TGACG	336	356	381	5	+	Hordeum vulgare	MeJA-responsiveness
Potri.010G193100.1.v3.0	PtrLAC27	TGACG-motif	TGACG	937	957	982	5	+	Hordeum vulgare	MeJA-responsiveness
Potri.010G193100.1.v3.0	PtrLAC27	TGACG-motif	TGACG	1123	1143	1168	5	+	Hordeum vulgare	MeJA-responsiveness
Potri.010G193100.1.v3.0	PtrLAC27	MBS	CAACTG	806	826	851	6	+	Arabidopsis thaliana	drought-inducibility
Potri.010G193100.1.v3.0	PtrLAC27	MBS	CAACTG	1697	1717	1742	6	-	Arabidopsis thaliana	drought-inducibility
Potri.010G193100.1.v3.0	PtrLAC27	I-box	GTATAAGGCC	769	789	814	9	-	Larix laricina	light responsiveness
Potri.010G193100.1.v3.0	PtrLAC27	G-Box	CACGTT	968	988	1013	6	-	Pisum sativum	light responsiveness
Potri.010G193100.1.v3.0	PtrLAC27	TC-rich repeats	GTTTTCTTAC	1255	1275	1300	9	-	Nicotiana tabacum	defense and stress responsiveness
Potri.010G193100.1.v3.0	PtrLAC27	TC-rich repeats	GTTTTCTTAC	1806	1826	1851	9	-	Nicotiana tabacum	defense and stress responsiveness
Potri.010G193100.1.v3.0	PtrLAC27	LTR	CCGAAA	280	300	325	6	-	Hordeum vulgare	low-temperature responsiveness
Potri.010G193100.1.v3.0	PtrLAC27	CGTCA-motif	CGTCA	336	356	381	5	-	Hordeum vulgare	MeJA-responsiveness
Potri.010G193100.1.v3.0	PtrLAC27	CGTCA-motif	CGTCA	937	957	982	5	-	Hordeum vulgare	MeJA-responsiveness
Potri.010G193100.1.v3.0	PtrLAC27	CGTCA-motif	CGTCA	1123	1143	1168	5	-	Hordeum vulgare	MeJA-responsiveness
Potri.011G071100.1.v3.0	PtrLAC28	G-box	TACGTG	276	296	321	6	+	Arabidopsis thaliana	light responsiveness
Potri.011G071100.1.v3.0	PtrLAC28	AT1-motif	AATTATTTTTTATT	37	57	82	13	+	Solanum tuberosum	light responsiveness
Potri.011G071100.1.v3.0	PtrLAC28	Box 4	ATTAAT	56	76	101	6	+	Petroselinum crispum	light responsiveness
Potri.011G071100.1.v3.0	PtrLAC28	Box 4	ATTAAT	102	122	147	6	+	Petroselinum crispum	light responsiveness
Potri.011G071100.1.v3.0	PtrLAC28	Box 4	ATTAAT	140	160	185	6	+	Petroselinum crispum	light responsiveness
Potri.011G071100.1.v3.0	PtrLAC28	Box 4	ATTAAT	289	309	334	6	+	Petroselinum crispum	light responsiveness
Potri.011G071100.1.v3.0	PtrLAC28	Box 4	ATTAAT	1010	1030	1055	6	-	Petroselinum crispum	light responsiveness
Potri.011G071100.1.v3.0	PtrLAC28	Box 4	ATTAAT	1034	1054	1079	6	-	Petroselinum crispum	light responsiveness
Potri.011G071100.1.v3.0	PtrLAC28	Box 4	ATTAAT	1644	1664	1689	6	-	Petroselinum crispum	light responsiveness
Potri.011G071100.1.v3.0	PtrLAC28	ABRE	CGTACGTGCA	274	294	319	9	+	Hordeum vulgare	abscisic acid responsiveness
Potri.011G071100.1.v3.0	PtrLAC28	ABRE	ACGTG	277	297	322	5	+	Arabidopsis thaliana	abscisic acid responsiveness
Potri.011G071100.1.v3.0	PtrLAC28	TC-rich repeats	ATTCTCTAAC	1135	1155	1180	9	-	Nicotiana tabacum	defense and stress responsiveness
Potri.011G071100.1.v3.0	PtrLAC28	P-box	CCTTTTG	556	576	601	7	+	Oryza sativa	gibberellin-responsiveness
Potri.011G071100.1.v3.0	PtrLAC28	I-box	cGATAAGGCG	1358	1378	1403	9	-	Zea mays	light responsiveness
Potri.011G120200.1.v3.0	PtrLAC29	MBS	CAACTG	1253	1273	1298	6	+	Arabidopsis thaliana	drought-inducibility
Potri.011G120200.1.v3.0	PtrLAC29	TGACG-motif	TGACG	207	227	252	5	+	Hordeum vulgare	MeJA-responsiveness
Potri.011G120200.1.v3.0	PtrLAC29	TGACG-motif	TGACG	729	749	774	5	+	Hordeum vulgare	MeJA-responsiveness
Potri.011G120200.1.v3.0	PtrLAC29	TGACG-motif	TGACG	1078	1098	1123	5	+	Hordeum vulgare	MeJA-responsiveness
Potri.011G120200.1.v3.0	PtrLAC29	ACA-motif	AATCACAACCATA	960	980	1005	12	-	Arabidopsis thaliana	light responsiveness
Potri.011G120200.1.v3.0	PtrLAC29	G-Box	CACGTT	859	879	904	6	+	Pisum sativum	light responsiveness
Potri.011G120200.1.v3.0	PtrLAC29	LAMP-element	CTTTATCA	1136	1156	1181	8	+	Pisum sativum	light responsiveness
Potri.011G120200.1.v3.0	PtrLAC29	ATC-motif	AGTAATCT	1377	1397	1422	8	+	Spinacia oleracea	light responsiveness
Potri.011G120200.1.v3.0	PtrLAC29	TATC-box	TATCCCA	1696	1716	1741	7	-	Oryza sativa	gibberellin-responsiveness
Potri.011G120200.1.v3.0	PtrLAC29	TC-rich repeats	ATTCTCTAAC	593	613	638	9	-	Nicotiana tabacum	defense and stress responsiveness
Potri.011G120200.1.v3.0	PtrLAC29	TC-rich repeats	ATTCTCTAAC	1462	1482	1507	9	+	Nicotiana tabacum	defense and stress responsiveness
Potri.011G120200.1.v3.0	PtrLAC29	CGTCA-motif	CGTCA	207	227	252	5	-	Hordeum vulgare	MeJA-responsiveness
Potri.011G120200.1.v3.0	PtrLAC29	CGTCA-motif	CGTCA	729	749	774	5	-	Hordeum vulgare	MeJA-responsiveness
Potri.011G120200.1.v3.0	PtrLAC29	CGTCA-motif	CGTCA	1078	1098	1123	5	-	Hordeum vulgare	MeJA-responsiveness
Potri.011G120200.1.v3.0	PtrLAC29	Box 4	ATTAAT	614	634	659	6	+	Petroselinum crispum	light responsiveness
Potri.011G120200.1.v3.0	PtrLAC29	ABRE	ACGTG	859	879	904	5	-	Arabidopsis thaliana	abscisic acid responsiveness
Potri.011G120200.1.v3.0	PtrLAC29	AE-box	AGAAACAA	1535	1555	1580	8	-	Arabidopsis thaliana	light responsiveness
Potri.011G120200.1.v3.0	PtrLAC29	MRE	AACCTAA	110	130	155	7	-	Petroselinum crispum	MYB binding site involved in light responsiveness
Potri.011G120200.1.v3.0	PtrLAC29	AuxRR-core	GGTCCAT	1099	1119	1144	7	-	Nicotiana tabacum	auxin responsiveness
Potri.011G120200.1.v3.0	PtrLAC29	TCT-motif	TCTTAC	1164	1184	1209	6	+	Arabidopsis thaliana	light responsiveness
Potri.011G120200.1.v3.0	PtrLAC29	TCCC-motif	TCTCCCT	1037	1057	1082	7	+	Spinacia oleracea	light responsiveness
Potri.011G120200.1.v3.0	PtrLAC29	GT1-motif	GGTTAA	1185	1205	1230	6	+	Arabidopsis thaliana	light responsiveness
Potri.011G120200.1.v3.0	PtrLAC29	ACE	GACACGTATG	822	842	867	9	+	Petroselinum crispum	light responsiveness
Potri.011G120300.1.v3.0	PtrLAC30	TCT-motif	TCTTAC	1152	1172	1197	6	+	Arabidopsis thaliana	light responsiveness
Potri.011G120300.1.v3.0	PtrLAC30	TCT-motif	TCTTAC	1415	1435	1460	6	+	Arabidopsis thaliana	light responsiveness
Potri.011G120300.1.v3.0	PtrLAC30	TCCC-motif	TCTCCCT	1028	1048	1073	7	+	Spinacia oleracea	light responsiveness
Potri.011G120300.1.v3.0	PtrLAC30	GT1-motif	GGTTAAT	1173	1193	1218	7	+	Avena sativa	light responsiveness
Potri.011G120300.1.v3.0	PtrLAC30	GT1-motif	GGTTAA	1444	1464	1489	6	+	Arabidopsis thaliana	light responsiveness
Potri.011G120300.1.v3.0	PtrLAC30	AE-box	AGAAACAA	1528	1548	1573	8	-	Arabidopsis thaliana	light responsiveness
Potri.011G120300.1.v3.0	PtrLAC30	ACE	GACACGTATG	817	837	862	9	+	Petroselinum crispum	light responsiveness
Potri.011G120300.1.v3.0	PtrLAC30	TGA-element	AACGAC	831	851	876	6	+	Brassica oleracea	auxin responsiveness
Potri.011G120300.1.v3.0	PtrLAC30	TGA-element	AACGAC	849	869	894	6	+	Brassica oleracea	auxin responsiveness
Potri.011G120300.1.v3.0	PtrLAC30	Box 4	ATTAAT	460	480	505	6	+	Petroselinum crispum	light responsiveness
Potri.011G120300.1.v3.0	PtrLAC30	Box 4	ATTAAT	595	615	640	6	+	Petroselinum crispum	light responsiveness
Potri.011G120300.1.v3.0	PtrLAC30	Box 4	ATTAAT	863	883	908	6	+	Petroselinum crispum	light responsiveness
Potri.011G120300.1.v3.0	PtrLAC30	ATC-motif	AGTAATCT	1366	1386	1411	8	+	Spinacia oleracea	light responsiveness
Potri.011G120300.1.v3.0	PtrLAC30	TATC-box	TATCCCA	1695	1715	1740	7	-	Oryza sativa	gibberellin-responsiveness
Potri.011G120300.1.v3.0	PtrLAC30	CGTCA-motif	CGTCA	172	192	217	5	-	Hordeum vulgare	MeJA-responsiveness
Potri.011G120300.1.v3.0	PtrLAC30	CGTCA-motif	CGTCA	1065	1085	1110	5	-	Hordeum vulgare	MeJA-responsiveness
Potri.011G120300.1.v3.0	PtrLAC30	TC-rich repeats	ATTCTCTAAC	1455	1475	1500	9	+	Nicotiana tabacum	defense and stress responsiveness
Potri.011G120300.1.v3.0	PtrLAC30	ACA-motif	AATCACAACCATA	947	967	992	12	-	Arabidopsis thaliana	light responsiveness
Potri.011G120300.1.v3.0	PtrLAC30	TGACG-motif	TGACG	172	192	217	5	+	Hordeum vulgare	MeJA-responsiveness
Potri.011G120300.1.v3.0	PtrLAC30	TGACG-motif	TGACG	1065	1085	1110	5	+	Hordeum vulgare	MeJA-responsiveness
Potri.011G120300.1.v3.0	PtrLAC30	LAMP-element	CTTTATCA	1124	1144	1169	8	+	Pisum sativum	light responsiveness
Potri.011G120300.1.v3.0	PtrLAC30	GARE-motif	TCTGTTG	1244	1264	1289	7	-	Brassica oleracea	gibberellin-responsiveness
Potri.012G048900.1.v3.0	PtrLAC31	TGACG-motif	TGACG	96	116	141	5	+	Hordeum vulgare	MeJA-responsiveness
Potri.012G048900.1.v3.0	PtrLAC31	TGACG-motif	TGACG	1745	1765	1790	5	-	Hordeum vulgare	MeJA-responsiveness
Potri.012G048900.1.v3.0	PtrLAC31	GATA-motif	GATAGGG	1596	1616	1641	7	-	Pisum sativum	light responsiveness
Potri.012G048900.1.v3.0	PtrLAC31	TC-rich repeats	ATTCTCTAAC	489	509	534	9	+	Nicotiana tabacum	defense and stress responsiveness
Potri.012G048900.1.v3.0	PtrLAC31	CGTCA-motif	CGTCA	96	116	141	5	-	Hordeum vulgare	MeJA-responsiveness
Potri.012G048900.1.v3.0	PtrLAC31	CGTCA-motif	CGTCA	1745	1765	1790	5	+	Hordeum vulgare	MeJA-responsiveness
Potri.012G048900.1.v3.0	PtrLAC31	Box 4	ATTAAT	663	683	708	6	+	Petroselinum crispum	light responsiveness
Potri.012G048900.1.v3.0	PtrLAC31	Box 4	ATTAAT	1214	1234	1259	6	-	Petroselinum crispum	light responsiveness
Potri.012G048900.1.v3.0	PtrLAC31	Box 4	ATTAAT	1248	1268	1293	6	-	Petroselinum crispum	light responsiveness
Potri.012G048900.1.v3.0	PtrLAC31	ABRE	ACGTG	1563	1583	1608	5	+	Arabidopsis thaliana	abscisic acid responsiveness
Potri.012G048900.1.v3.0	PtrLAC31	TGA-element	AACGAC	411	431	456	6	-	Brassica oleracea	auxin responsiveness
Potri.012G048900.1.v3.0	PtrLAC31	TGA-element	AACGAC	642	662	687	6	-	Brassica oleracea	auxin responsiveness
Potri.012G048900.1.v3.0	PtrLAC31	G-box	TACGTG	1562	1582	1607	6	+	Arabidopsis thaliana	light responsiveness
Potri.012G048900.1.v3.0	PtrLAC31	AE-box	AGAAACAA	1280	1300	1325	8	+	Arabidopsis thaliana	light responsiveness
Potri.012G048900.1.v3.0	PtrLAC31	Sp1	GGGCGG	1499	1519	1544	6	-	Oryza sativa	light responsiveness
Potri.012G048900.1.v3.0	PtrLAC31	TCCC-motif	TCTCCCT	1343	1363	1388	7	+	Spinacia oleracea	light responsiveness
Potri.012G048900.1.v3.0	PtrLAC31	TCT-motif	TCTTAC	1298	1318	1343	6	-	Arabidopsis thaliana	light responsiveness
Potri.012G048900.1.v3.0	PtrLAC31	GT1-motif	GGTTAA	633	653	678	6	+	Arabidopsis thaliana	light responsiveness
Potri.013G152700.1.v3.0	PtrLAC32	GATA-motif	GATAGGG	267	287	312	7	-	Pisum sativum	light responsiveness
Potri.013G152700.1.v3.0	PtrLAC32	GATA-motif	AAGATAAGATT	1539	1559	1584	10	+	Arabidopsis thaliana	light responsiveness
Potri.013G152700.1.v3.0	PtrLAC32	MBS	CAACTG	968	988	1013	6	-	Arabidopsis thaliana	drought-inducibility
Potri.013G152700.1.v3.0	PtrLAC32	TGACG-motif	TGACG	876	896	921	5	+	Hordeum vulgare	MeJA-responsiveness
Potri.013G152700.1.v3.0	PtrLAC32	CGTCA-motif	CGTCA	876	896	921	5	-	Hordeum vulgare	MeJA-responsiveness
Potri.013G152700.1.v3.0	PtrLAC32	TC-rich repeats	ATTCTCTAAC	599	619	644	9	+	Nicotiana tabacum	defense and stress responsiveness
Potri.013G152700.1.v3.0	PtrLAC32	Gap-box	CAAATGAA(A/G)A	1734	1754	1779	9.5	-	Arabidopsis thaliana	light responsiveness
Potri.013G152700.1.v3.0	PtrLAC32	Box 4	ATTAAT	363	383	408	6	+	Petroselinum crispum	light responsiveness
Potri.013G152700.1.v3.0	PtrLAC32	Box 4	ATTAAT	860	880	905	6	+	Petroselinum crispum	light responsiveness
Potri.013G152700.1.v3.0	PtrLAC32	Box 4	ATTAAT	1058	1078	1103	6	-	Petroselinum crispum	light responsiveness
Potri.013G152700.1.v3.0	PtrLAC32	Box 4	ATTAAT	1228	1248	1273	6	-	Petroselinum crispum	light responsiveness
Potri.013G152700.1.v3.0	PtrLAC32	Box 4	ATTAAT	1354	1374	1399	6	-	Petroselinum crispum	light responsiveness
Potri.013G152700.1.v3.0	PtrLAC32	ABRE	ACGTG	1046	1066	1091	5	-	Arabidopsis thaliana	abscisic acid responsiveness
Potri.013G152700.1.v3.0	PtrLAC32	ABRE	ACGTG	1519	1539	1564	5	-	Arabidopsis thaliana	abscisic acid responsiveness
Potri.013G152700.1.v3.0	PtrLAC32	TCT-motif	TCTTAC	193	213	238	6	-	Arabidopsis thaliana	light responsiveness
Potri.013G152700.1.v3.0	PtrLAC32	TCT-motif	TCTTAC	1913	1933	1958	6	+	Arabidopsis thaliana	light responsiveness
Potri.013G152700.1.v3.0	PtrLAC32	GT1-motif	GGTTAA	589	609	634	6	+	Arabidopsis thaliana	light responsiveness
Potri.013G152700.1.v3.0	PtrLAC32	MRE	AACCTAA	894	914	939	7	-	Petroselinum crispum	MYB binding site involved in light responsiveness
Potri.013G152700.1.v3.0	PtrLAC32	G-box	CACGTC	1046	1066	1091	6	+	Zea mays	light responsiveness
Potri.013G152700.1.v3.0	PtrLAC32	G-box	TACGTG	1519	1539	1564	6	-	Arabidopsis thaliana	light responsiveness
Potri.014G100600.1.v3.0	PtrLAC33	AE-box	AGAAACAA	1360	1380	1405	8	+	Arabidopsis thaliana	light responsiveness
Potri.014G100600.1.v3.0	PtrLAC33	AuxRR-core	GGTCCAT	1012	1032	1057	7	+	Nicotiana tabacum	auxin responsiveness
Potri.014G100600.1.v3.0	PtrLAC33	ACE	GCGACGTACC	1550	1570	1595	9	-	Petroselinum crispum	light responsiveness
Potri.014G100600.1.v3.0	PtrLAC33	G-box	CACGTG	238	258	283	6	+	Arabidopsis thaliana	light responsiveness
Potri.014G100600.1.v3.0	PtrLAC33	TGA-element	AACGAC	196	216	241	6	+	Brassica oleracea	auxin responsiveness
Potri.014G100600.1.v3.0	PtrLAC33	Box 4	ATTAAT	330	350	375	6	+	Petroselinum crispum	light responsiveness
Potri.014G100600.1.v3.0	PtrLAC33	Box 4	ATTAAT	351	371	396	6	+	Petroselinum crispum	light responsiveness
Potri.014G100600.1.v3.0	PtrLAC33	Box 4	ATTAAT	489	509	534	6	+	Petroselinum crispum	light responsiveness
Potri.014G100600.1.v3.0	PtrLAC33	Box 4	ATTAAT	523	543	568	6	+	Petroselinum crispum	light responsiveness
Potri.014G100600.1.v3.0	PtrLAC33	Box 4	ATTAAT	561	581	606	6	+	Petroselinum crispum	light responsiveness
Potri.014G100600.1.v3.0	PtrLAC33	Box 4	ATTAAT	588	608	633	6	+	Petroselinum crispum	light responsiveness
Potri.014G100600.1.v3.0	PtrLAC33	Box 4	ATTAAT	909	929	954	6	+	Petroselinum crispum	light responsiveness
Potri.014G100600.1.v3.0	PtrLAC33	Box 4	ATTAAT	1867	1887	1912	6	-	Petroselinum crispum	light responsiveness
Potri.014G100600.1.v3.0	PtrLAC33	ABRE	CACGTG	238	258	283	6	+	Arabidopsis thaliana	abscisic acid responsiveness
Potri.014G100600.1.v3.0	PtrLAC33	ABRE	ACGTG	239	259	284	5	+	Arabidopsis thaliana	abscisic acid responsiveness
Potri.014G100600.1.v3.0	PtrLAC33	CGTCA-motif	CGTCA	1631	1651	1676	5	+	Hordeum vulgare	MeJA-responsiveness
Potri.014G100600.1.v3.0	PtrLAC33	GATA-motif	AAGGATAAGG	895	915	940	9	+	Solanum tuberosum	light responsiveness
Potri.014G100600.1.v3.0	PtrLAC33	MBS	CAACTG	506	526	551	6	-	Arabidopsis thaliana	drought-inducibility
Potri.014G100600.1.v3.0	PtrLAC33	MBS	CAACTG	1488	1508	1533	6	+	Arabidopsis thaliana	drought-inducibility
Potri.014G100600.1.v3.0	PtrLAC33	TGACG-motif	TGACG	1631	1651	1676	5	-	Hordeum vulgare	MeJA-responsiveness
Potri.014G100600.1.v3.0	PtrLAC33	G-Box	CACGTG	238	258	283	6	+	Pisum sativum	light responsiveness
Potri.015G040400.1.v3.0	PtrLAC34	G-Box	CACGTT	181	201	226	6	-	Pisum sativum	light responsiveness
Potri.015G040400.1.v3.0	PtrLAC34	G-Box	CACGTT	942	962	987	6	-	Pisum sativum	light responsiveness
Potri.015G040400.1.v3.0	PtrLAC34	G-Box	CACGTT	1124	1144	1169	6	-	Pisum sativum	light responsiveness
Potri.015G040400.1.v3.0	PtrLAC34	GARE-motif	TCTGTTG	736	756	781	7	+	Brassica oleracea	gibberellin-responsiveness
Potri.015G040400.1.v3.0	PtrLAC34	GATA-motif	AAGATAAGATT	593	613	638	10	+	Arabidopsis thaliana	light responsiveness
Potri.015G040400.1.v3.0	PtrLAC34	GATA-motif	GATAGGG	728	748	773	7	-	Pisum sativum	light responsiveness
Potri.015G040400.1.v3.0	PtrLAC34	chs-CMA2a	TCACTTGA	97	117	142	8	+	Petroselinum crispum	light responsiveness
Potri.015G040400.1.v3.0	PtrLAC34	TC-rich repeats	ATTCTCTAAC	1867	1887	1912	9	-	Nicotiana tabacum	defense and stress responsiveness
Potri.015G040400.1.v3.0	PtrLAC34	ATC-motif	AGTAATCT	392	412	437	8	+	Spinacia oleracea	light responsiveness
Potri.015G040400.1.v3.0	PtrLAC34	Box 4	ATTAAT	115	135	160	6	+	Petroselinum crispum	light responsiveness
Potri.015G040400.1.v3.0	PtrLAC34	Box 4	ATTAAT	789	809	834	6	+	Petroselinum crispum	light responsiveness
Potri.015G040400.1.v3.0	PtrLAC34	Box 4	ATTAAT	1539	1559	1584	6	-	Petroselinum crispum	light responsiveness
Potri.015G040400.1.v3.0	PtrLAC34	ABRE	ACGTG	182	202	227	5	+	Arabidopsis thaliana	abscisic acid responsiveness
Potri.015G040400.1.v3.0	PtrLAC34	ABRE	ACGTG	943	963	988	5	+	Arabidopsis thaliana	abscisic acid responsiveness
Potri.015G040400.1.v3.0	PtrLAC34	ABRE	ACGTG	1125	1145	1170	5	+	Arabidopsis thaliana	abscisic acid responsiveness
Potri.015G040400.1.v3.0	PtrLAC34	TGA-element	AACGAC	373	393	418	6	+	Brassica oleracea	auxin responsiveness
Potri.015G040400.1.v3.0	PtrLAC34	TGA-element	AACGAC	1183	1203	1228	6	+	Brassica oleracea	auxin responsiveness
Potri.015G040400.1.v3.0	PtrLAC34	TGA-element	AACGAC	1750	1770	1795	6	-	Brassica oleracea	auxin responsiveness
Potri.015G040400.1.v3.0	PtrLAC34	G-box	CACGAC	1456	1476	1501	6	-	Zea mays	light responsiveness
Potri.015G040400.1.v3.0	PtrLAC34	TCT-motif	TCTTAC	1275	1295	1320	6	+	Arabidopsis thaliana	light responsiveness
Potri.015G040400.1.v3.0	PtrLAC34	GT1-motif	GGTTAAT	1072	1092	1117	7	+	Avena sativa	light responsiveness
Potri.015G040600.1.v3.0	PtrLAC35	CGTCA-motif	CGTCA	16	36	61	5	-	Hordeum vulgare	MeJA-responsiveness
Potri.015G040600.1.v3.0	PtrLAC35	TC-rich repeats	GTTTTCTTAC	747	767	792	9	-	Nicotiana tabacum	defense and stress responsiveness
Potri.015G040600.1.v3.0	PtrLAC35	TC-rich repeats	ATTCTCTAAC	1866	1886	1911	9	-	Nicotiana tabacum	defense and stress responsiveness
Potri.015G040600.1.v3.0	PtrLAC35	P-box	CCTTTTG	503	523	548	7	-	Oryza sativa	gibberellin-responsiveness
Potri.015G040600.1.v3.0	PtrLAC35	I-box	TGATAATGT	42	62	87	9	+	Solanum tuberosum	light responsiveness
Potri.015G040600.1.v3.0	PtrLAC35	I-box	TGATAATGT	1117	1137	1162	9	+	Solanum tuberosum	light responsiveness
Potri.015G040600.1.v3.0	PtrLAC35	AuxRE	TGTCTCAATAAG	488	508	533	11	-	Glycine max	auxin responsiveness
Potri.015G040600.1.v3.0	PtrLAC35	TGACG-motif	TGACG	16	36	61	5	+	Hordeum vulgare	MeJA-responsiveness
Potri.015G040600.1.v3.0	PtrLAC35	G-box	CACGAC	1530	1550	1575	6	-	Zea mays	light responsiveness
Potri.015G040600.1.v3.0	PtrLAC35	TCT-motif	TCTTAC	244	264	289	6	-	Arabidopsis thaliana	light responsiveness
Potri.015G040600.1.v3.0	PtrLAC35	TCT-motif	TCTTAC	857	877	902	6	-	Arabidopsis thaliana	light responsiveness
Potri.015G040600.1.v3.0	PtrLAC35	TGA-element	AACGAC	1780	1800	1825	6	-	Brassica oleracea	auxin responsiveness
Potri.015G040700.1.v3.0	PtrLAC36	ACE	CTAACGTATT	1367	1387	1412	9	+	Petroselinum crispum	light responsiveness
Potri.015G040700.1.v3.0	PtrLAC36	G-box	CACGTG	938	958	983	6	+	Arabidopsis thaliana	light responsiveness
Potri.015G040700.1.v3.0	PtrLAC36	GT1-motif	GGTTAA	120	140	165	6	-	Arabidopsis thaliana	light responsiveness
Potri.015G040700.1.v3.0	PtrLAC36	GT1-motif	GGTTAA	292	312	337	6	+	Arabidopsis thaliana	light responsiveness
Potri.015G040700.1.v3.0	PtrLAC36	GT1-motif	GGTTAA	394	414	439	6	-	Arabidopsis thaliana	light responsiveness
Potri.015G040700.1.v3.0	PtrLAC36	GT1-motif	GGTTAA	402	422	447	6	+	Arabidopsis thaliana	light responsiveness
Potri.015G040700.1.v3.0	PtrLAC36	GT1-motif	GGTTAAT	572	592	617	7	+	Avena sativa	light responsiveness
Potri.015G040700.1.v3.0	PtrLAC36	GT1-motif	GGTTAA	736	756	781	6	+	Arabidopsis thaliana	light responsiveness
Potri.015G040700.1.v3.0	PtrLAC36	GT1-motif	GGTTAA	738	758	783	6	-	Arabidopsis thaliana	light responsiveness
Potri.015G040700.1.v3.0	PtrLAC36	GT1-motif	GGTTAA	754	774	799	6	+	Arabidopsis thaliana	light responsiveness
Potri.015G040700.1.v3.0	PtrLAC36	MRE	AACCTAA	289	309	334	7	-	Petroselinum crispum	MYB binding site involved in light responsiveness
Potri.015G040700.1.v3.0	PtrLAC36	ABRE	CACGTG	938	958	983	6	+	Arabidopsis thaliana	abscisic acid responsiveness
Potri.015G040700.1.v3.0	PtrLAC36	ABRE	ACGTG	939	959	984	5	+	Arabidopsis thaliana	abscisic acid responsiveness
Potri.015G040700.1.v3.0	PtrLAC36	Box 4	ATTAAT	229	249	274	6	+	Petroselinum crispum	light responsiveness
Potri.015G040700.1.v3.0	PtrLAC36	Box 4	ATTAAT	666	686	711	6	+	Petroselinum crispum	light responsiveness
Potri.015G040700.1.v3.0	PtrLAC36	Box 4	ATTAAT	1228	1248	1273	6	-	Petroselinum crispum	light responsiveness
Potri.015G040700.1.v3.0	PtrLAC36	Gap-box	CAAATGAA(A/G)A	173	193	218	9.5	+	Arabidopsis thaliana	light responsiveness
Potri.015G040700.1.v3.0	PtrLAC36	TC-rich repeats	ATTCTCTAAC	1692	1712	1737	9	-	Nicotiana tabacum	defense and stress responsiveness
Potri.015G040700.1.v3.0	PtrLAC36	TC-rich repeats	ATTCTCTAAC	1866	1886	1911	9	-	Nicotiana tabacum	defense and stress responsiveness
Potri.015G040700.1.v3.0	PtrLAC36	ATC-motif	AGTAATCT	845	865	890	8	-	Spinacia oleracea	light responsiveness
Potri.015G040700.1.v3.0	PtrLAC36	ATCT-motif	AATCTAATCC	875	895	920	9	+	Pisum sativum	light responsiveness
Potri.015G040700.1.v3.0	PtrLAC36	I-box	TGATAATGT	1215	1235	1260	9	+	Solanum tuberosum	light responsiveness
Potri.015G040700.1.v3.0	PtrLAC36	G-Box	CACGTG	938	958	983	6	+	Pisum sativum	light responsiveness
Potri.015G040700.1.v3.0	PtrLAC36	MBS	CAACTG	926	946	971	6	+	Arabidopsis thaliana	drought-inducibility
Potri.015G040800.1.v3.0	PtrLAC51	LTR	CCGAAA	-13	7	32	6	-	Hordeum vulgare	low-temperature responsiveness
Potri.015G040800.1.v3.0	PtrLAC51	LTR	CCGAAA	463	483	508	6	+	Hordeum vulgare	low-temperature responsiveness
Potri.015G040800.1.v3.0	PtrLAC51	TC-rich repeats	GTTTTCTTAC	368	388	413	9	+	Nicotiana tabacum	defense and stress responsiveness
Potri.015G040800.1.v3.0	PtrLAC51	MBS	CAACTG	611	631	656	6	+	Arabidopsis thaliana	drought-inducibility
Potri.015G040800.1.v3.0	PtrLAC51	I-box	TGATAATGT	863	883	908	9	+	Solanum tuberosum	light responsiveness
Potri.015G040800.1.v3.0	PtrLAC51	TCT-motif	TCTTAC	1445	1465	1490	6	-	Arabidopsis thaliana	light responsiveness
Potri.015G040800.1.v3.0	PtrLAC51	GT1-motif	GGTTAA	77	97	122	6	-	Arabidopsis thaliana	light responsiveness
Potri.015G040800.1.v3.0	PtrLAC51	ACE	CTAACGTATT	1015	1035	1060	9	+	Petroselinum crispum	light responsiveness
Potri.015G040800.1.v3.0	PtrLAC51	G-box	CACGAC	1715	1735	1760	6	-	Zea mays	light responsiveness
Potri.015G040800.1.v3.0	PtrLAC51	Box 4	ATTAAT	694	714	739	6	+	Petroselinum crispum	light responsiveness
Potri.015G040800.1.v3.0	PtrLAC51	Box 4	ATTAAT	876	896	921	6	+	Petroselinum crispum	light responsiveness
Potri.015G040800.1.v3.0	PtrLAC51	Box 4	ATTAAT	1671	1691	1716	6	-	Petroselinum crispum	light responsiveness
Potri.015G040800.1.v3.0	PtrLAC51	Box 4	ATTAAT	1754	1774	1799	6	-	Petroselinum crispum	light responsiveness
Potri.015G040800.1.v3.0	PtrLAC51	Box 4	ATTAAT	1786	1806	1831	6	-	Petroselinum crispum	light responsiveness
Potri.016G106000.1.v3.0	PtrLAC37	G-Box	TCCACATGGCA	196	216	241	10	-	Triticum aestivum	light responsiveness
Potri.016G106000.1.v3.0	PtrLAC37	I-box	gGATAAGGTG	150	170	195	9	-	Zea mays	light responsiveness
Potri.016G106000.1.v3.0	PtrLAC37	TGACG-motif	TGACG	218	238	263	5	+	Hordeum vulgare	MeJA-responsiveness
Potri.016G106000.1.v3.0	PtrLAC37	CGTCA-motif	CGTCA	218	238	263	5	-	Hordeum vulgare	MeJA-responsiveness
Potri.016G106000.1.v3.0	PtrLAC37	LTR	CCGAAA	558	578	603	6	+	Hordeum vulgare	low-temperature responsiveness
Potri.016G106000.1.v3.0	PtrLAC37	ATC-motif	AGTAATCT	778	798	823	8	+	Spinacia oleracea	light responsiveness
Potri.016G106000.1.v3.0	PtrLAC37	ATC-motif	AGCTATCCA	947	967	992	9	+	Arabidopsis thaliana	light responsiveness
Potri.016G106000.1.v3.0	PtrLAC37	ATC-motif	AGCTATCCA	1020	1040	1065	9	+	Arabidopsis thaliana	light responsiveness
Potri.016G106000.1.v3.0	PtrLAC37	TATC-box	TATCCCA	1643	1663	1688	7	+	Oryza sativa	gibberellin-responsiveness
Potri.016G106000.1.v3.0	PtrLAC37	Box 4	ATTAAT	533	553	578	6	+	Petroselinum crispum	light responsiveness
Potri.016G106000.1.v3.0	PtrLAC37	Box 4	ATTAAT	542	562	587	6	+	Petroselinum crispum	light responsiveness
Potri.016G106000.1.v3.0	PtrLAC37	Box 4	ATTAAT	1043	1063	1088	6	-	Petroselinum crispum	light responsiveness
Potri.016G106000.1.v3.0	PtrLAC37	Box 4	ATTAAT	1522	1542	1567	6	-	Petroselinum crispum	light responsiveness
Potri.016G106000.1.v3.0	PtrLAC37	MRE	AACCTAA	1548	1568	1593	7	+	Petroselinum crispum	MYB binding site involved in light responsiveness
Potri.016G106000.1.v3.0	PtrLAC37	AuxRR-core	GGTCCAT	1778	1798	1823	7	-	Nicotiana tabacum	auxin responsiveness
Potri.016G106000.1.v3.0	PtrLAC37	TCT-motif	TCTTAC	1465	1485	1510	6	-	Arabidopsis thaliana	light responsiveness
Potri.016G106000.1.v3.0	PtrLAC37	TCT-motif	TCTTAC	1722	1742	1767	6	+	Arabidopsis thaliana	light responsiveness
Potri.016G106100.1.v3.0	PtrLAC38	ABRE	ACGTG	690	710	735	5	+	Arabidopsis thaliana	abscisic acid responsiveness
Potri.016G106100.1.v3.0	PtrLAC38	Box 4	ATTAAT	906	926	951	6	+	Petroselinum crispum	light responsiveness
Potri.016G106100.1.v3.0	PtrLAC38	Box 4	ATTAAT	1085	1105	1130	6	-	Petroselinum crispum	light responsiveness
Potri.016G106100.1.v3.0	PtrLAC38	TGA-element	AACGAC	1003	1023	1048	6	+	Brassica oleracea	auxin responsiveness
Potri.016G106100.1.v3.0	PtrLAC38	G-box	CACGTC	689	709	734	6	-	Zea mays	light responsiveness
Potri.016G106100.1.v3.0	PtrLAC38	AE-box	AGAAACTT	765	785	810	8	-	Arabidopsis thaliana	light responsiveness
Potri.016G106100.1.v3.0	PtrLAC38	GT1-motif	GGTTAA	370	390	415	6	-	Arabidopsis thaliana	light responsiveness
Potri.016G106100.1.v3.0	PtrLAC38	GT1-motif	GGTTAA	641	661	686	6	+	Arabidopsis thaliana	light responsiveness
Potri.016G106100.1.v3.0	PtrLAC38	GA-motif	ATAGATAA	1593	1613	1638	8	-	Arabidopsis thaliana	light responsiveness
Potri.016G106100.1.v3.0	PtrLAC38	GA-motif	ATAGATAA	1828	1848	1873	8	-	Arabidopsis thaliana	light responsiveness
Potri.016G106100.1.v3.0	PtrLAC38	TCT-motif	TCTTAC	541	561	586	6	-	Arabidopsis thaliana	light responsiveness
Potri.016G106100.1.v3.0	PtrLAC38	TCT-motif	TCTTAC	1721	1741	1766	6	+	Arabidopsis thaliana	light responsiveness
Potri.016G106100.1.v3.0	PtrLAC38	GARE-motif	TCTGTTG	894	914	939	7	+	Brassica oleracea	gibberellin-responsiveness
Potri.016G106100.1.v3.0	PtrLAC38	TGACG-motif	TGACG	688	708	733	5	+	Hordeum vulgare	MeJA-responsiveness
Potri.016G106100.1.v3.0	PtrLAC38	TGACG-motif	TGACG	728	748	773	5	+	Hordeum vulgare	MeJA-responsiveness
Potri.016G106100.1.v3.0	PtrLAC38	CGTCA-motif	CGTCA	688	708	733	5	-	Hordeum vulgare	MeJA-responsiveness
Potri.016G106100.1.v3.0	PtrLAC38	CGTCA-motif	CGTCA	728	748	773	5	-	Hordeum vulgare	MeJA-responsiveness
Potri.016G106300.1.v3.0	PtrLAC39	GT1-motif	GGTTAA	1007	1027	1052	6	+	Arabidopsis thaliana	light responsiveness
Potri.016G106300.1.v3.0	PtrLAC39	GT1-motif	GGTTAA	1158	1178	1203	6	+	Arabidopsis thaliana	light responsiveness
Potri.016G106300.1.v3.0	PtrLAC39	TCT-motif	TCTTAC	455	475	500	6	+	Arabidopsis thaliana	light responsiveness
Potri.016G106300.1.v3.0	PtrLAC39	TGA-element	AACGAC	1223	1243	1268	6	+	Brassica oleracea	auxin responsiveness
Potri.016G106300.1.v3.0	PtrLAC39	Box 4	ATTAAT	155	175	200	6	+	Petroselinum crispum	light responsiveness
Potri.016G106300.1.v3.0	PtrLAC39	Box 4	ATTAAT	1594	1614	1639	6	-	Petroselinum crispum	light responsiveness
Potri.016G106300.1.v3.0	PtrLAC39	TC-rich repeats	GTTTTCTTAC	1193	1213	1238	9	-	Nicotiana tabacum	defense and stress responsiveness
Potri.016G106300.1.v3.0	PtrLAC39	TC-rich repeats	ATTCTCTAAC	1407	1427	1452	9	-	Nicotiana tabacum	defense and stress responsiveness
Potri.016G106300.1.v3.0	PtrLAC39	MBS	CAACTG	75	95	120	6	+	Arabidopsis thaliana	drought-inducibility
Potri.016G106300.1.v3.0	PtrLAC39	MBS	CAACTG	174	194	219	6	+	Arabidopsis thaliana	drought-inducibility
Potri.016G106300.1.v3.0	PtrLAC39	MBS	CAACTG	1523	1543	1568	6	-	Arabidopsis thaliana	drought-inducibility
Potri.016G106300.1.v3.0	PtrLAC39	chs-CMA2a	TCACTTGA	1469	1489	1514	8	-	Petroselinum crispum	light responsiveness
Potri.016G107500.1.v3.0	PtrLAC52	TGACG-motif	TGACG	850	870	895	5	+	Hordeum vulgare	MeJA-responsiveness
Potri.016G107500.1.v3.0	PtrLAC52	MBS	CAACTG	1219	1239	1264	6	-	Arabidopsis thaliana	drought-inducibility
Potri.016G107500.1.v3.0	PtrLAC52	GATA-motif	AAGGATAAGG	498	518	543	9	-	Solanum tuberosum	light responsiveness
Potri.016G107500.1.v3.0	PtrLAC52	GATA-motif	GATAGGA	622	642	667	7	-	Arabidopsis thaliana	light responsiveness
Potri.016G107500.1.v3.0	PtrLAC52	GARE-motif	TCTGTTG	1020	1040	1065	7	+	Brassica oleracea	gibberellin-responsiveness
Potri.016G107500.1.v3.0	PtrLAC52	I-box	gGATAAGGTG	782	802	827	9	-	Zea mays	light responsiveness
Potri.016G107500.1.v3.0	PtrLAC52	ATCT-motif	AATCTAATCC	341	361	386	9	-	Pisum sativum	light responsiveness
Potri.016G107500.1.v3.0	PtrLAC52	TATC-box	TATCCCA	1620	1640	1665	7	+	Oryza sativa	gibberellin-responsiveness
Potri.016G107500.1.v3.0	PtrLAC52	CGTCA-motif	CGTCA	850	870	895	5	-	Hordeum vulgare	MeJA-responsiveness
Potri.016G107500.1.v3.0	PtrLAC52	TGA-element	AACGAC	1881	1901	1926	6	+	Brassica oleracea	auxin responsiveness
Potri.016G107500.1.v3.0	PtrLAC52	Box 4	ATTAAT	1267	1287	1312	6	-	Petroselinum crispum	light responsiveness
Potri.016G107500.1.v3.0	PtrLAC52	Box 4	ATTAAT	1313	1333	1358	6	-	Petroselinum crispum	light responsiveness
Potri.016G107500.1.v3.0	PtrLAC52	AuxRR-core	GGTCCAT	1756	1776	1801	7	-	Nicotiana tabacum	auxin responsiveness
Potri.016G107500.1.v3.0	PtrLAC52	MRE	AACCTAA	60	80	105	7	+	Petroselinum crispum	MYB binding site involved in light responsiveness
Potri.016G107500.1.v3.0	PtrLAC52	MRE	AACCTAA	194	214	239	7	-	Petroselinum crispum	MYB binding site involved in light responsiveness
Potri.016G107500.1.v3.0	PtrLAC52	MRE	AACCTAA	344	364	389	7	-	Petroselinum crispum	MYB binding site involved in light responsiveness
Potri.016G107500.1.v3.0	PtrLAC52	MRE	AACCTAA	539	559	584	7	-	Petroselinum crispum	MYB binding site involved in light responsiveness
Potri.016G107500.1.v3.0	PtrLAC52	MRE	AACCTAA	581	601	626	7	-	Petroselinum crispum	MYB binding site involved in light responsiveness
Potri.016G107500.1.v3.0	PtrLAC52	GA-motif	ATAGATAA	134	154	179	8	-	Arabidopsis thaliana	light responsiveness
Potri.016G107500.1.v3.0	PtrLAC52	TCT-motif	TCTTAC	533	553	578	6	-	Arabidopsis thaliana	light responsiveness
Potri.016G107500.1.v3.0	PtrLAC52	TCT-motif	TCTTAC	1699	1719	1744	6	+	Arabidopsis thaliana	light responsiveness
Potri.016G107900.1.v3.0	PtrLAC40	GA-motif	ATAGATAA	1603	1623	1648	8	-	Arabidopsis thaliana	light responsiveness
Potri.016G107900.1.v3.0	PtrLAC40	GA-motif	ATAGATAA	1834	1854	1879	8	-	Arabidopsis thaliana	light responsiveness
Potri.016G107900.1.v3.0	PtrLAC40	GT1-motif	GGTTAA	382	402	427	6	-	Arabidopsis thaliana	light responsiveness
Potri.016G107900.1.v3.0	PtrLAC40	GT1-motif	GGTTAA	653	673	698	6	+	Arabidopsis thaliana	light responsiveness
Potri.016G107900.1.v3.0	PtrLAC40	TCT-motif	TCTTAC	553	573	598	6	-	Arabidopsis thaliana	light responsiveness
Potri.016G107900.1.v3.0	PtrLAC40	TCT-motif	TCTTAC	1731	1751	1776	6	+	Arabidopsis thaliana	light responsiveness
Potri.016G107900.1.v3.0	PtrLAC40	ABRE	ACGTG	702	722	747	5	+	Arabidopsis thaliana	abscisic acid responsiveness
Potri.016G107900.1.v3.0	PtrLAC40	Box 4	ATTAAT	757	777	802	6	+	Petroselinum crispum	light responsiveness
Potri.016G107900.1.v3.0	PtrLAC40	Box 4	ATTAAT	918	938	963	6	+	Petroselinum crispum	light responsiveness
Potri.016G107900.1.v3.0	PtrLAC40	Box 4	ATTAAT	1096	1116	1141	6	-	Petroselinum crispum	light responsiveness
Potri.016G107900.1.v3.0	PtrLAC40	TGA-element	AACGAC	1015	1035	1060	6	+	Brassica oleracea	auxin responsiveness
Potri.016G107900.1.v3.0	PtrLAC40	CGTCA-motif	CGTCA	740	760	785	5	-	Hordeum vulgare	MeJA-responsiveness
Potri.016G107900.1.v3.0	PtrLAC40	GARE-motif	TCTGTTG	906	926	951	7	+	Brassica oleracea	gibberellin-responsiveness
Potri.016G107900.1.v3.0	PtrLAC40	G-Box	CACGTT	701	721	746	6	-	Pisum sativum	light responsiveness
Potri.016G107900.1.v3.0	PtrLAC40	TGACG-motif	TGACG	740	760	785	5	+	Hordeum vulgare	MeJA-responsiveness
Potri.016G107900.1.v3.0	PtrLAC40	MBS	CAACTG	1116	1136	1161	6	+	Arabidopsis thaliana	drought-inducibility
Potri.016G112000.1.v3.0	PtrLAC41	TC-rich repeats	GTTTTCTTAC	1743	1763	1788	9	-	Nicotiana tabacum	defense and stress responsiveness
Potri.016G112000.1.v3.0	PtrLAC41	TC-rich repeats	GTTTTCTTAC	1765	1785	1810	9	-	Nicotiana tabacum	defense and stress responsiveness
Potri.016G112000.1.v3.0	PtrLAC41	chs-CMA1a	TTACTTAA	324	344	369	8	-	Daucus carota	light responsiveness
Potri.016G112000.1.v3.0	PtrLAC41	LTR	CCGAAA	1379	1399	1424	6	+	Hordeum vulgare	low-temperature responsiveness
Potri.016G112000.1.v3.0	PtrLAC41	CGTCA-motif	CGTCA	280	300	325	5	-	Hordeum vulgare	MeJA-responsiveness
Potri.016G112000.1.v3.0	PtrLAC41	TGACG-motif	TGACG	280	300	325	5	+	Hordeum vulgare	MeJA-responsiveness
Potri.016G112000.1.v3.0	PtrLAC41	G-Box	CACGTT	1471	1491	1516	6	-	Pisum sativum	light responsiveness
Potri.016G112000.1.v3.0	PtrLAC41	AuxRR-core	GGTCCAT	1734	1754	1779	7	+	Nicotiana tabacum	auxin responsiveness
Potri.016G112000.1.v3.0	PtrLAC41	MRE	AACCTAA	49	69	94	7	+	Petroselinum crispum	MYB binding site involved in light responsiveness
Potri.016G112000.1.v3.0	PtrLAC41	MRE	AACCTAA	519	539	564	7	+	Petroselinum crispum	MYB binding site involved in light responsiveness
Potri.016G112000.1.v3.0	PtrLAC41	AE-box	AGAAACTT	1299	1319	1344	8	+	Arabidopsis thaliana	light responsiveness
Potri.016G112000.1.v3.0	PtrLAC41	AE-box	AGAAACAA	1831	1851	1876	8	+	Arabidopsis thaliana	light responsiveness
Potri.016G112000.1.v3.0	PtrLAC41	GT1-motif	GGTTAAT	312	332	357	7	-	Avena sativa	light responsiveness
Potri.016G112000.1.v3.0	PtrLAC41	GT1-motif	GGTTAA	313	333	358	6	-	Arabidopsis thaliana	light responsiveness
Potri.016G112000.1.v3.0	PtrLAC41	GT1-motif	GGTTAAT	867	887	912	7	+	Avena sativa	light responsiveness
Potri.016G112000.1.v3.0	PtrLAC41	GT1-motif	GGTTAA	889	909	934	6	-	Arabidopsis thaliana	light responsiveness
Potri.016G112000.1.v3.0	PtrLAC41	GT1-motif	GGTTAAT	915	935	960	7	-	Avena sativa	light responsiveness
Potri.016G112000.1.v3.0	PtrLAC41	GT1-motif	GGTTAA	916	936	961	6	-	Arabidopsis thaliana	light responsiveness
Potri.016G112000.1.v3.0	PtrLAC41	TCT-motif	TCTTAC	1765	1785	1810	6	-	Arabidopsis thaliana	light responsiveness
Potri.016G112000.1.v3.0	PtrLAC41	G-box	CACGTC	281	301	326	6	-	Zea mays	light responsiveness
Potri.016G112000.1.v3.0	PtrLAC41	TGA-element	AACGAC	1530	1550	1575	6	+	Brassica oleracea	auxin responsiveness
Potri.016G112000.1.v3.0	PtrLAC41	TGA-element	AACGAC	1837	1857	1882	6	+	Brassica oleracea	auxin responsiveness
Potri.016G112000.1.v3.0	PtrLAC41	chs-CMA2b	GAACCTACACAC	1808	1828	1853	11	+	Hordeum vulgare	light responsiveness
Potri.016G112000.1.v3.0	PtrLAC41	ABRE	ACGTG	282	302	327	5	+	Arabidopsis thaliana	abscisic acid responsiveness
Potri.016G112000.1.v3.0	PtrLAC41	ABRE	ACGTG	1472	1492	1517	5	+	Arabidopsis thaliana	abscisic acid responsiveness
Potri.016G112000.1.v3.0	PtrLAC41	Box 4	ATTAAT	932	952	977	6	+	Petroselinum crispum	light responsiveness
Potri.016G112000.1.v3.0	PtrLAC41	Box 4	ATTAAT	1074	1094	1119	6	-	Petroselinum crispum	light responsiveness
Potri.016G112000.1.v3.0	PtrLAC41	Box 4	ATTAAT	1235	1255	1280	6	-	Petroselinum crispum	light responsiveness
Potri.016G112000.1.v3.0	PtrLAC41	Box 4	ATTAAT	1316	1336	1361	6	-	Petroselinum crispum	light responsiveness
Potri.016G112000.1.v3.0	PtrLAC41	Box 4	ATTAAT	1506	1526	1551	6	-	Petroselinum crispum	light responsiveness
Potri.016G112000.1.v3.0	PtrLAC41	Box 4	ATTAAT	1680	1700	1725	6	-	Petroselinum crispum	light responsiveness
Potri.016G112100.1.v3.0	PtrLAC42	GARE-motif	TCTGTTG	824	844	869	7	+	Brassica oleracea	gibberellin-responsiveness
Potri.016G112100.1.v3.0	PtrLAC42	G-Box	CACGTT	567	587	612	6	-	Pisum sativum	light responsiveness
Potri.016G112100.1.v3.0	PtrLAC42	ATCT-motif	AATCTAATCC	1304	1324	1349	9	+	Pisum sativum	light responsiveness
Potri.016G112100.1.v3.0	PtrLAC42	TATC-box	TATCCCA	1201	1221	1246	7	+	Oryza sativa	gibberellin-responsiveness
Potri.016G112100.1.v3.0	PtrLAC42	TC-rich repeats	GTTTTCTTAC	129	149	174	9	-	Nicotiana tabacum	defense and stress responsiveness
Potri.016G112100.1.v3.0	PtrLAC42	TC-rich repeats	GTTTTCTTAC	1476	1496	1521	9	-	Nicotiana tabacum	defense and stress responsiveness
Potri.016G112100.1.v3.0	PtrLAC42	TC-rich repeats	GTTTTCTTAC	1781	1801	1826	9	-	Nicotiana tabacum	defense and stress responsiveness
Potri.016G112100.1.v3.0	PtrLAC42	TGA-element	AACGAC	1858	1878	1903	6	+	Brassica oleracea	auxin responsiveness
Potri.016G112100.1.v3.0	PtrLAC42	ABRE	ACGTG	568	588	613	5	+	Arabidopsis thaliana	abscisic acid responsiveness
Potri.016G112100.1.v3.0	PtrLAC42	ABRE	ACGTG	1778	1798	1823	5	-	Arabidopsis thaliana	abscisic acid responsiveness
Potri.016G112100.1.v3.0	PtrLAC42	Box 4	ATTAAT	109	129	154	6	+	Petroselinum crispum	light responsiveness
Potri.016G112100.1.v3.0	PtrLAC42	Box 4	ATTAAT	394	414	439	6	+	Petroselinum crispum	light responsiveness
Potri.016G112100.1.v3.0	PtrLAC42	AE-box	AGAAACTT	1489	1509	1534	8	+	Arabidopsis thaliana	light responsiveness
Potri.016G112100.1.v3.0	PtrLAC42	MRE	AACCTAA	166	186	211	7	-	Petroselinum crispum	MYB binding site involved in light responsiveness
Potri.016G112100.1.v3.0	PtrLAC42	MRE	AACCTAA	1843	1863	1888	7	+	Petroselinum crispum	MYB binding site involved in light responsiveness
Potri.016G112100.1.v3.0	PtrLAC42	GT1-motif	GGTTAA	456	476	501	6	+	Arabidopsis thaliana	light responsiveness
Potri.016G112100.1.v3.0	PtrLAC42	TCT-motif	TCTTAC	1781	1801	1826	6	-	Arabidopsis thaliana	light responsiveness
Potri.016G112100.1.v3.0	PtrLAC42	G-box	TACGTG	1778	1798	1823	6	-	Arabidopsis thaliana	light responsiveness
Potri.019G088500.1.v3.0	PtrLAC43	TGACG-motif	TGACG	124	144	169	5	-	Hordeum vulgare	MeJA-responsiveness
Potri.019G088500.1.v3.0	PtrLAC43	GATA-motif	GATAGGA	1973	1993	2018	7	+	Arabidopsis thaliana	light responsiveness
Potri.019G088500.1.v3.0	PtrLAC43	G-Box	CACGTG	674	694	719	6	+	Pisum sativum	light responsiveness
Potri.019G088500.1.v3.0	PtrLAC43	G-Box	CACGTT	716	736	761	6	+	Pisum sativum	light responsiveness
Potri.019G088500.1.v3.0	PtrLAC43	G-Box	CACGTG	842	862	887	6	+	Pisum sativum	light responsiveness
Potri.019G088500.1.v3.0	PtrLAC43	G-Box	CACGTT	1019	1039	1064	6	+	Pisum sativum	light responsiveness
Potri.019G088500.1.v3.0	PtrLAC43	TC-rich repeats	GTTTTCTTAC	279	299	324	9	-	Nicotiana tabacum	defense and stress responsiveness
Potri.019G088500.1.v3.0	PtrLAC43	CGTCA-motif	CGTCA	124	144	169	5	+	Hordeum vulgare	MeJA-responsiveness
Potri.019G088500.1.v3.0	PtrLAC43	Gap-box	CAAATGAA(A/G)A	808	828	853	9.5	-	Arabidopsis thaliana	light responsiveness
Potri.019G088500.1.v3.0	PtrLAC43	TGA-element	AACGAC	1884	1904	1929	6	+	Brassica oleracea	auxin responsiveness
Potri.019G088500.1.v3.0	PtrLAC43	ABRE	ACGTG	428	448	473	5	-	Arabidopsis thaliana	abscisic acid responsiveness
Potri.019G088500.1.v3.0	PtrLAC43	ABRE	CACGTG	674	694	719	6	+	Arabidopsis thaliana	abscisic acid responsiveness
Potri.019G088500.1.v3.0	PtrLAC43	ABRE	ACGTG	675	695	720	5	+	Arabidopsis thaliana	abscisic acid responsiveness
Potri.019G088500.1.v3.0	PtrLAC43	ABRE	ACGTG	716	736	761	5	-	Arabidopsis thaliana	abscisic acid responsiveness
Potri.019G088500.1.v3.0	PtrLAC43	ABRE	CACGTG	842	862	887	6	+	Arabidopsis thaliana	abscisic acid responsiveness
Potri.019G088500.1.v3.0	PtrLAC43	ABRE	ACGTG	843	863	888	5	+	Arabidopsis thaliana	abscisic acid responsiveness
Potri.019G088500.1.v3.0	PtrLAC43	ABRE	ACGTG	1019	1039	1064	5	-	Arabidopsis thaliana	abscisic acid responsiveness
Potri.019G088500.1.v3.0	PtrLAC43	Box 4	ATTAAT	625	645	670	6	+	Petroselinum crispum	light responsiveness
Potri.019G088500.1.v3.0	PtrLAC43	Box 4	ATTAAT	752	772	797	6	+	Petroselinum crispum	light responsiveness
Potri.019G088500.1.v3.0	PtrLAC43	Box 4	ATTAAT	1368	1388	1413	6	-	Petroselinum crispum	light responsiveness
Potri.019G088500.1.v3.0	PtrLAC43	Box 4	ATTAAT	1520	1540	1565	6	-	Petroselinum crispum	light responsiveness
Potri.019G088500.1.v3.0	PtrLAC43	Box 4	ATTAAT	1804	1824	1849	6	-	Petroselinum crispum	light responsiveness
Potri.019G088500.1.v3.0	PtrLAC43	AT1-motif	AATTATTTTTTATT	802	822	847	13	+	Solanum tuberosum	light responsiveness
Potri.019G088500.1.v3.0	PtrLAC43	GA-motif	ATAGATAA	474	494	519	8	+	Arabidopsis thaliana	light responsiveness
Potri.019G088500.1.v3.0	PtrLAC43	TCT-motif	TCTTAC	1473	1493	1518	6	-	Arabidopsis thaliana	light responsiveness
Potri.019G088500.1.v3.0	PtrLAC43	G-box	CACGTC	428	448	473	6	+	Zea mays	light responsiveness
Potri.019G088500.1.v3.0	PtrLAC43	G-box	CACGTG	674	694	719	6	+	Arabidopsis thaliana	light responsiveness
Potri.019G088500.1.v3.0	PtrLAC43	G-box	CACGTG	842	862	887	6	+	Arabidopsis thaliana	light responsiveness
Potri.019G088500.1.v3.0	PtrLAC43	G-box	TAAACGTG	1019	1039	1064	8	-	Brassica oleracea	light responsiveness
Potri.019G088600.1.v3.0	PtrLAC44	P-box	CCTTTTG	352	372	397	7	-	Oryza sativa	gibberellin-responsiveness
Potri.019G088600.1.v3.0	PtrLAC44	G-Box	CACGTT	28	48	73	6	+	Pisum sativum	light responsiveness
Potri.019G088600.1.v3.0	PtrLAC44	G-Box	CACGTG	843	863	888	6	+	Pisum sativum	light responsiveness
Potri.019G088600.1.v3.0	PtrLAC44	G-Box	CACGTT	1355	1375	1400	6	+	Pisum sativum	light responsiveness
Potri.019G088600.1.v3.0	PtrLAC44	GATA-motif	GATAGGA	1973	1993	2018	7	+	Arabidopsis thaliana	light responsiveness
Potri.019G088600.1.v3.0	PtrLAC44	TGACG-motif	TGACG	1073	1093	1118	5	-	Hordeum vulgare	MeJA-responsiveness
Potri.019G088600.1.v3.0	PtrLAC44	MBS	CAACTG	1059	1079	1104	6	+	Arabidopsis thaliana	drought-inducibility
Potri.019G088600.1.v3.0	PtrLAC44	CGTCA-motif	CGTCA	1073	1093	1118	5	+	Hordeum vulgare	MeJA-responsiveness
Potri.019G088600.1.v3.0	PtrLAC44	ABRE	ACGTG	28	48	73	5	-	Arabidopsis thaliana	abscisic acid responsiveness
Potri.019G088600.1.v3.0	PtrLAC44	ABRE	CACGTG	843	863	888	6	+	Arabidopsis thaliana	abscisic acid responsiveness
Potri.019G088600.1.v3.0	PtrLAC44	ABRE	ACGTG	844	864	889	5	+	Arabidopsis thaliana	abscisic acid responsiveness
Potri.019G088600.1.v3.0	PtrLAC44	ABRE	ACGTG	1355	1375	1400	5	-	Arabidopsis thaliana	abscisic acid responsiveness
Potri.019G088600.1.v3.0	PtrLAC44	Box 4	ATTAAT	163	183	208	6	+	Petroselinum crispum	light responsiveness
Potri.019G088600.1.v3.0	PtrLAC44	Box 4	ATTAAT	203	223	248	6	+	Petroselinum crispum	light responsiveness
Potri.019G088600.1.v3.0	PtrLAC44	Box 4	ATTAAT	700	720	745	6	+	Petroselinum crispum	light responsiveness
Potri.019G088600.1.v3.0	PtrLAC44	Box 4	ATTAAT	957	977	1002	6	+	Petroselinum crispum	light responsiveness
Potri.019G088600.1.v3.0	PtrLAC44	Box 4	ATTAAT	1037	1057	1082	6	-	Petroselinum crispum	light responsiveness
Potri.019G088600.1.v3.0	PtrLAC44	Box 4	ATTAAT	1206	1226	1251	6	-	Petroselinum crispum	light responsiveness
Potri.019G088600.1.v3.0	PtrLAC44	Box 4	ATTAAT	1808	1828	1853	6	-	Petroselinum crispum	light responsiveness
Potri.019G088600.1.v3.0	PtrLAC44	Gap-box	CAAATGAA(A/G)A	756	776	801	9.5	-	Arabidopsis thaliana	light responsiveness
Potri.019G088600.1.v3.0	PtrLAC44	G-box	CACGTG	843	863	888	6	+	Arabidopsis thaliana	light responsiveness
Potri.019G088600.1.v3.0	PtrLAC44	G-box	CACGAC	1283	1303	1328	6	-	Zea mays	light responsiveness
Potri.019G088600.1.v3.0	PtrLAC44	G-box	TAAACGTG	1355	1375	1400	8	-	Brassica oleracea	light responsiveness
Potri.019G088600.1.v3.0	PtrLAC44	GT1-motif	GGTTAA	357	377	402	6	+	Arabidopsis thaliana	light responsiveness
Potri.019G088600.1.v3.0	PtrLAC44	GA-motif	ATAGATAA	64	84	109	8	+	Arabidopsis thaliana	light responsiveness
Potri.019G088600.1.v3.0	PtrLAC44	TCT-motif	TCTTAC	510	530	555	6	+	Arabidopsis thaliana	light responsiveness
Potri.019G088600.1.v3.0	PtrLAC44	AT1-motif	AATTATTTTTTATT	750	770	795	13	+	Solanum tuberosum	light responsiveness
Potri.019G088600.1.v3.0	PtrLAC44	MRE	AACCTAA	537	557	582	7	+	Petroselinum crispum	MYB binding site involved in light responsiveness
Potri.019G088700.1.v3.0	PtrLAC45	G-box	CACGAC	1286	1306	1331	6	-	Zea mays	light responsiveness
Potri.019G088700.1.v3.0	PtrLAC45	AuxRR-core	GGTCCAT	1543	1563	1588	7	-	Nicotiana tabacum	auxin responsiveness
Potri.019G088700.1.v3.0	PtrLAC45	Sp1	GGGCGG	1329	1349	1374	6	+	Oryza sativa	light responsiveness
Potri.019G088700.1.v3.0	PtrLAC45	AT1-motif	AATTATTTTTTATT	946	966	991	13	+	Solanum tuberosum	light responsiveness
Potri.019G088700.1.v3.0	PtrLAC45	GT1-motif	GGTTAA	1208	1228	1253	6	+	Arabidopsis thaliana	light responsiveness
Potri.019G088700.1.v3.0	PtrLAC45	Box 4	ATTAAT	546	566	591	6	+	Petroselinum crispum	light responsiveness
Potri.019G088700.1.v3.0	PtrLAC45	Box 4	ATTAAT	1173	1193	1218	6	-	Petroselinum crispum	light responsiveness
Potri.019G088700.1.v3.0	PtrLAC45	Box 4	ATTAAT	1808	1828	1853	6	-	Petroselinum crispum	light responsiveness
Potri.019G088700.1.v3.0	PtrLAC45	Box II	TGGTAATAA	538	558	583	9	-	Solanum tuberosum	light responsiveness
Potri.019G088700.1.v3.0	PtrLAC45	TGA-element	AACGAC	1888	1908	1933	6	+	Brassica oleracea	auxin responsiveness
Potri.019G088700.1.v3.0	PtrLAC45	CGTCA-motif	CGTCA	1033	1053	1078	5	-	Hordeum vulgare	MeJA-responsiveness
Potri.019G088700.1.v3.0	PtrLAC45	CGTCA-motif	CGTCA	1113	1133	1158	5	+	Hordeum vulgare	MeJA-responsiveness
Potri.019G088700.1.v3.0	PtrLAC45	TGACG-motif	TGACG	1033	1053	1078	5	+	Hordeum vulgare	MeJA-responsiveness
Potri.019G088700.1.v3.0	PtrLAC45	TGACG-motif	TGACG	1113	1133	1158	5	-	Hordeum vulgare	MeJA-responsiveness
Potri.019G088700.1.v3.0	PtrLAC45	GATA-motif	GATAGGA	1973	1993	2018	7	+	Arabidopsis thaliana	light responsiveness
Potri.019G088800.1.v3.0	PtrLAC46	TCT-motif	TCTTAC	615	635	660	6	+	Arabidopsis thaliana	light responsiveness
Potri.019G088800.1.v3.0	PtrLAC46	TCT-motif	TCTTAC	1240	1260	1285	6	+	Arabidopsis thaliana	light responsiveness
Potri.019G088800.1.v3.0	PtrLAC46	GA-motif	ATAGATAA	665	685	710	8	-	Arabidopsis thaliana	light responsiveness
Potri.019G088800.1.v3.0	PtrLAC46	G-box	CACGTG	1302	1322	1347	6	-	Arabidopsis thaliana	light responsiveness
Potri.019G088800.1.v3.0	PtrLAC46	G-box	CACGTG	1736	1756	1781	6	-	Arabidopsis thaliana	light responsiveness
Potri.019G088800.1.v3.0	PtrLAC46	ACE	CTAACGTATT	321	341	366	9	-	Petroselinum crispum	light responsiveness
Potri.019G088800.1.v3.0	PtrLAC46	TGA-element	AACGAC	1148	1168	1193	6	+	Brassica oleracea	auxin responsiveness
Potri.019G088800.1.v3.0	PtrLAC46	TGA-element	AACGAC	1884	1904	1929	6	+	Brassica oleracea	auxin responsiveness
Potri.019G088800.1.v3.0	PtrLAC46	Box 4	ATTAAT	107	127	152	6	+	Petroselinum crispum	light responsiveness
Potri.019G088800.1.v3.0	PtrLAC46	Box 4	ATTAAT	488	508	533	6	+	Petroselinum crispum	light responsiveness
Potri.019G088800.1.v3.0	PtrLAC46	Box 4	ATTAAT	853	873	898	6	+	Petroselinum crispum	light responsiveness
Potri.019G088800.1.v3.0	PtrLAC46	Box 4	ATTAAT	893	913	938	6	+	Petroselinum crispum	light responsiveness
Potri.019G088800.1.v3.0	PtrLAC46	Box 4	ATTAAT	1552	1572	1597	6	-	Petroselinum crispum	light responsiveness
Potri.019G088800.1.v3.0	PtrLAC46	Box 4	ATTAAT	1804	1824	1849	6	-	Petroselinum crispum	light responsiveness
Potri.019G088800.1.v3.0	PtrLAC46	ABRE	ACGTG	160	180	205	5	-	Arabidopsis thaliana	abscisic acid responsiveness
Potri.019G088800.1.v3.0	PtrLAC46	ABRE	ACGTG	323	343	368	5	-	Arabidopsis thaliana	abscisic acid responsiveness
Potri.019G088800.1.v3.0	PtrLAC46	ABRE	ACGTG	1090	1110	1135	5	+	Arabidopsis thaliana	abscisic acid responsiveness
Potri.019G088800.1.v3.0	PtrLAC46	ABRE	CACGTG	1302	1322	1347	6	-	Arabidopsis thaliana	abscisic acid responsiveness
Potri.019G088800.1.v3.0	PtrLAC46	ABRE	ACGTG	1303	1323	1348	5	+	Arabidopsis thaliana	abscisic acid responsiveness
Potri.019G088800.1.v3.0	PtrLAC46	ABRE	CACGTG	1736	1756	1781	6	-	Arabidopsis thaliana	abscisic acid responsiveness
Potri.019G088800.1.v3.0	PtrLAC46	ABRE	ACGTG	1737	1757	1782	5	+	Arabidopsis thaliana	abscisic acid responsiveness
Potri.019G088800.1.v3.0	PtrLAC46	ATC-motif	AGTAATCT	632	652	677	8	+	Spinacia oleracea	light responsiveness
Potri.019G088800.1.v3.0	PtrLAC46	CGTCA-motif	CGTCA	929	949	974	5	+	Hordeum vulgare	MeJA-responsiveness
Potri.019G088800.1.v3.0	PtrLAC46	TGACG-motif	TGACG	929	949	974	5	-	Hordeum vulgare	MeJA-responsiveness
Potri.019G088800.1.v3.0	PtrLAC46	GATA-motif	GATAGGA	1973	1993	2018	7	+	Arabidopsis thaliana	light responsiveness
Potri.019G088800.1.v3.0	PtrLAC46	G-Box	CACGTT	160	180	205	6	+	Pisum sativum	light responsiveness
Potri.019G088800.1.v3.0	PtrLAC46	G-Box	CACGTT	323	343	368	6	+	Pisum sativum	light responsiveness
Potri.019G088800.1.v3.0	PtrLAC46	G-Box	CACGTT	1089	1109	1134	6	-	Pisum sativum	light responsiveness
Potri.019G088800.1.v3.0	PtrLAC46	G-Box	CACGTG	1302	1322	1347	6	-	Pisum sativum	light responsiveness
Potri.019G088800.1.v3.0	PtrLAC46	G-Box	CACGTG	1736	1756	1781	6	-	Pisum sativum	light responsiveness
Potri.019G088900.1.v3.0	PtrLAC47	Box 4	ATTAAT	1802	1822	1847	6	-	Petroselinum crispum	light responsiveness
Potri.019G088900.1.v3.0	PtrLAC47	TGA-element	AACGAC	1882	1902	1927	6	+	Brassica oleracea	auxin responsiveness
Potri.019G088900.1.v3.0	PtrLAC47	TCCC-motif	TCTCCCT	1929	1949	1974	7	-	Spinacia oleracea	light responsiveness
Potri.019G088900.1.v3.0	PtrLAC47	GATT-motif	CTCCTGATTGGA	11	31	56	11	-	Oryza sativa	light responsiveness
Potri.019G088900.1.v3.0	PtrLAC47	GATA-motif	GATAGGA	1973	1993	2018	7	+	Arabidopsis thaliana	light responsiveness
Potri.019G088900.1.v3.0	PtrLAC47	chs-CMA2a	TCACTTGA	209	229	254	8	+	Petroselinum crispum	light responsiveness
Potri.019G088900.1.v3.0	PtrLAC47	TGACG-motif	TGACG	1297	1317	1342	5	-	Hordeum vulgare	MeJA-responsiveness
Potri.019G088900.1.v3.0	PtrLAC47	CGTCA-motif	CGTCA	1297	1317	1342	5	+	Hordeum vulgare	MeJA-responsiveness
Potri.019G088900.1.v3.0	PtrLAC47	LTR	CCGAAA	444	464	489	6	+	Hordeum vulgare	low-temperature responsiveness
Potri.019G088900.1.v3.0	PtrLAC47	TC-rich repeats	ATTCTCTAAC	371	391	416	9	+	Nicotiana tabacum	defense and stress responsiveness
Potri.019G088900.1.v3.0	PtrLAC47	ATCT-motif	AATCTAATCC	448	468	493	10	+	Pisum sativum	light responsiveness
Potri.019G121700.1.v3.0	PtrLAC48	MBS	CAACTG	940	960	985	6	+	Arabidopsis thaliana	drought-inducibility
Potri.019G121700.1.v3.0	PtrLAC48	MBS	CAACTG	1690	1710	1735	6	+	Arabidopsis thaliana	drought-inducibility
Potri.019G121700.1.v3.0	PtrLAC48	chs-CMA2a	TCACTTGA	286	306	331	8	+	Petroselinum crispum	light responsiveness
Potri.019G121700.1.v3.0	PtrLAC48	LTR	CCGAAA	1517	1537	1562	6	+	Hordeum vulgare	low-temperature responsiveness
Potri.019G121700.1.v3.0	PtrLAC48	ATCT-motif	AATCTAATCC	969	989	1014	9	+	Pisum sativum	light responsiveness
Potri.019G121700.1.v3.0	PtrLAC48	Box 4	ATTAAT	1329	1349	1374	6	-	Petroselinum crispum	light responsiveness
Potri.019G121700.1.v3.0	PtrLAC48	ABRE	ACGTG	515	535	560	5	+	Arabidopsis thaliana	abscisic acid responsiveness
Potri.019G121700.1.v3.0	PtrLAC48	Gap-box	CAAATGAA(A/G)A	1760	1780	1805	9.5	-	Arabidopsis thaliana	light responsiveness
Potri.019G121700.1.v3.0	PtrLAC48	G-box	CACGTC	514	534	559	6	-	Zea mays	light responsiveness
Potri.019G121700.1.v3.0	PtrLAC48	G-box	CACGAC	796	816	841	6	-	Zea mays	light responsiveness
Potri.019G121700.1.v3.0	PtrLAC48	MRE	AACCTAA	1183	1203	1228	7	+	Petroselinum crispum	MYB binding site involved in light responsiveness
Potri.019G121700.1.v3.0	PtrLAC48	MRE	AACCTAA	1489	1509	1534	7	+	Petroselinum crispum	MYB binding site involved in light responsiveness
Potri.019G121700.1.v3.0	PtrLAC48	TCT-motif	TCTTAC	206	226	251	6	+	Arabidopsis thaliana	light responsiveness
Potri.019G121700.1.v3.0	PtrLAC48	GT1-motif	GGTTAA	358	378	403	6	+	Arabidopsis thaliana	light responsiveness
Potri.019G121700.1.v3.0	PtrLAC48	GT1-motif	GGTTAA	479	499	524	6	-	Arabidopsis thaliana	light responsiveness
Potri.019G121700.1.v3.0	PtrLAC48	GT1-motif	GGTTAAT	1180	1200	1225	7	-	Avena sativa	light responsiveness
Potri.019G121700.1.v3.0	PtrLAC48	GT1-motif	GGTTAA	1181	1201	1226	6	-	Arabidopsis thaliana	light responsiveness
Potri.019G124300.1.v3.0	PtrLAC53	LTR	CCGAAA	1509	1529	1554	6	+	Hordeum vulgare	low-temperature responsiveness
Potri.019G124300.1.v3.0	PtrLAC53	ATCT-motif	AATCTAATCC	948	968	993	9	+	Pisum sativum	light responsiveness
Potri.019G124300.1.v3.0	PtrLAC53	chs-CMA2a	TCACTTGA	265	285	310	8	+	Petroselinum crispum	light responsiveness
Potri.019G124300.1.v3.0	PtrLAC53	MBS	CAACTG	919	939	964	6	+	Arabidopsis thaliana	drought-inducibility
Potri.019G124300.1.v3.0	PtrLAC53	MBS	CAACTG	1690	1710	1735	6	+	Arabidopsis thaliana	drought-inducibility
Potri.019G124300.1.v3.0	PtrLAC53	G-box	CACGAC	775	795	820	6	-	Zea mays	light responsiveness
Potri.019G124300.1.v3.0	PtrLAC53	TCT-motif	TCTTAC	185	205	230	6	+	Arabidopsis thaliana	light responsiveness
Potri.019G124300.1.v3.0	PtrLAC53	GT1-motif	GGTTAAT	1159	1179	1204	7	-	Avena sativa	light responsiveness
Potri.019G124300.1.v3.0	PtrLAC53	GT1-motif	GGTTAA	1160	1180	1205	6	-	Arabidopsis thaliana	light responsiveness
Potri.019G124300.1.v3.0	PtrLAC53	MRE	AACCTAA	1162	1182	1207	7	+	Petroselinum crispum	MYB binding site involved in light responsiveness
Potri.019G124300.1.v3.0	PtrLAC53	MRE	AACCTAA	1481	1501	1526	7	+	Petroselinum crispum	MYB binding site involved in light responsiveness
Potri.019G124300.1.v3.0	PtrLAC53	Box 4	ATTAAT	135	155	180	6	+	Petroselinum crispum	light responsiveness
Potri.019G124300.1.v3.0	PtrLAC53	Box 4	ATTAAT	399	419	444	6	+	Petroselinum crispum	light responsiveness
Potri.019G124300.1.v3.0	PtrLAC53	Box 4	ATTAAT	1321	1341	1366	6	-	Petroselinum crispum	light responsiveness
Potri.019G124300.1.v3.0	PtrLAC53	Gap-box	CAAATGAA(A/G)A	1760	1780	1805	9.5	-	Arabidopsis thaliana	light responsiveness
Potri.T079500.1.v3.0	PtrLAC16	TGACG-motif	TGACG	1145	1165	1190	5	+	Hordeum vulgare	MeJA-responsiveness
Potri.T079500.1.v3.0	PtrLAC16	TGACG-motif	TGACG	1733	1753	1778	5	-	Hordeum vulgare	MeJA-responsiveness
Potri.T079500.1.v3.0	PtrLAC16	MBS	CAACTG	623	643	668	6	-	Arabidopsis thaliana	drought-inducibility
Potri.T079500.1.v3.0	PtrLAC16	LS7	CAGATTTATTTTTA	1810	1830	1855	13	+	Zea mays	light responsiveness
Potri.T079500.1.v3.0	PtrLAC16	G-Box	CACGTT	105	125	150	6	+	Pisum sativum	light responsiveness
Potri.T079500.1.v3.0	PtrLAC16	G-Box	CACGTT	535	555	580	6	+	Pisum sativum	light responsiveness
Potri.T079500.1.v3.0	PtrLAC16	CGTCA-motif	CGTCA	1145	1165	1190	5	-	Hordeum vulgare	MeJA-responsiveness
Potri.T079500.1.v3.0	PtrLAC16	CGTCA-motif	CGTCA	1733	1753	1778	5	+	Hordeum vulgare	MeJA-responsiveness
Potri.T079500.1.v3.0	PtrLAC16	TGA-element	AACGAC	46	66	91	6	-	Brassica oleracea	auxin responsiveness
Potri.T079500.1.v3.0	PtrLAC16	TGA-element	AACGAC	253	273	298	6	-	Brassica oleracea	auxin responsiveness
Potri.T079500.1.v3.0	PtrLAC16	ABRE	ACGTG	105	125	150	5	-	Arabidopsis thaliana	abscisic acid responsiveness
Potri.T079500.1.v3.0	PtrLAC16	ABRE	ACGTG	535	555	580	5	-	Arabidopsis thaliana	abscisic acid responsiveness
Potri.T079500.1.v3.0	PtrLAC16	ABRE	ACGTG	1147	1167	1192	5	+	Arabidopsis thaliana	abscisic acid responsiveness
Potri.T079500.1.v3.0	PtrLAC16	Box II	ACACGTTGT	534	554	579	9	+	Sinapis alba	light responsiveness
Potri.T079500.1.v3.0	PtrLAC16	Box 4	ATTAAT	277	297	322	6	+	Petroselinum crispum	light responsiveness
Potri.T079500.1.v3.0	PtrLAC16	Box 4	ATTAAT	315	335	360	6	+	Petroselinum crispum	light responsiveness
Potri.T079500.1.v3.0	PtrLAC16	Box 4	ATTAAT	387	407	432	6	+	Petroselinum crispum	light responsiveness
Potri.T079500.1.v3.0	PtrLAC16	Box 4	ATTAAT	679	699	724	6	+	Petroselinum crispum	light responsiveness
Potri.T079500.1.v3.0	PtrLAC16	Box 4	ATTAAT	1282	1302	1327	6	-	Petroselinum crispum	light responsiveness
Potri.T079500.1.v3.0	PtrLAC16	Box 4	ATTAAT	1286	1306	1331	6	-	Petroselinum crispum	light responsiveness
Potri.T079500.1.v3.0	PtrLAC16	MRE	AACCTAA	178	198	223	7	-	Petroselinum crispum	MYB binding site involved in light responsiveness
Potri.T079500.1.v3.0	PtrLAC16	MRE	AACCTAA	1494	1514	1539	7	+	Petroselinum crispum	MYB binding site involved in light responsiveness
Potri.T079500.1.v3.0	PtrLAC16	TCT-motif	TCTTAC	588	608	633	6	+	Arabidopsis thaliana	light responsiveness
Potri.T079500.1.v3.0	PtrLAC16	TCT-motif	TCTTAC	1454	1474	1499	6	+	Arabidopsis thaliana	light responsiveness
Potri.T079500.1.v3.0	PtrLAC16	G-box	CACGTC	1146	1166	1191	6	-	Zea mays	light responsiveness
